# Supplementary material for: Reversible NOx storage over Ru/Na–Y zeolite
Source: Royal Society of Chemistry journal article supplement (doi:10.1039/c0sc00285b), 2010-01-01
Supplement: c0sc00285b.pdf [file c0sc00285b.pdf]

## Reversible NO<sub>x</sub> storage over Ru/Na-Y zeolite

*Sylvia Smeekens Steven Heylen, Kenneth Villani, Kristof Houthoofd, Eric Godard, Moniek Tromp, Jin Won Seo, Michaël DeMarco, Christine E. A. Kirschhock, Johan A. Martens\**

### **Electronic Supporting Information**

\* [johan.martens@biw.kuleuven.be](mailto:johan.martens@biw.kuleuven.be)

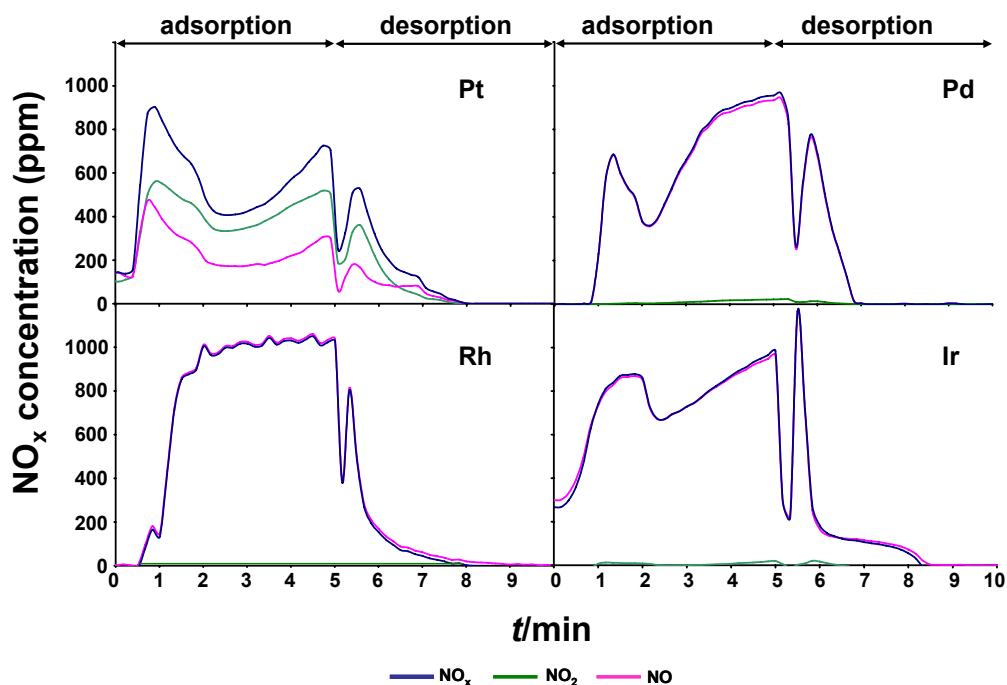

**Fig. S1** Detailed NO<sub>x</sub> adsorption-desorption patterns recorded at the outlet of a Pt(3%)/Na-Y, Pd(3%)/Na-Y, Rh(3%)/Na-Y and Ir(3%)/Na-Y adsorbent bed at 250 °C. All the catalysts were pretreated at 450 °C for 1 h under a flow of 5% O<sub>2</sub>, 3% H<sub>2</sub>O and balance N<sub>2</sub>. Shown are typical reproducible cycles after some time of operation. Gas composition during lean phase was 1000 ppm NO, 5% O<sub>2</sub>, 3% H<sub>2</sub>O and balance N<sub>2</sub>. Regeneration of the bed during desorption phase was done with 1% H<sub>2</sub>, 3% H<sub>2</sub>O and balance N<sub>2</sub>.

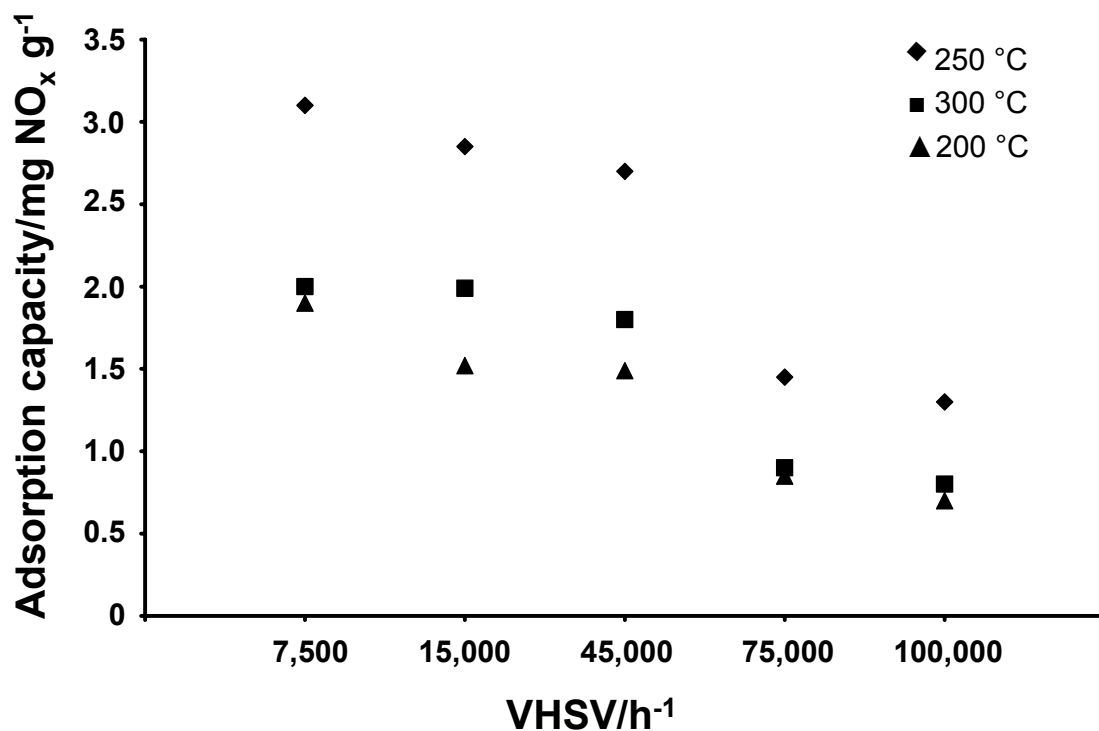

Fig. S2 NO<sub>x</sub> adsorption capacity of a Ru(3%)/NaY zeolite at different volumetric space velocities and different reaction temperatures (◆ 250 °C, ■ 300 °C, ▲ 200 °C). The NO<sub>x</sub> adsorption capacities were calculated based on an average of 10 cycles. The standard deviation of the NO<sub>x</sub> adsorption capacities was less than  $\pm 0.1$  mg NO<sub>x</sub>/g in all data points.

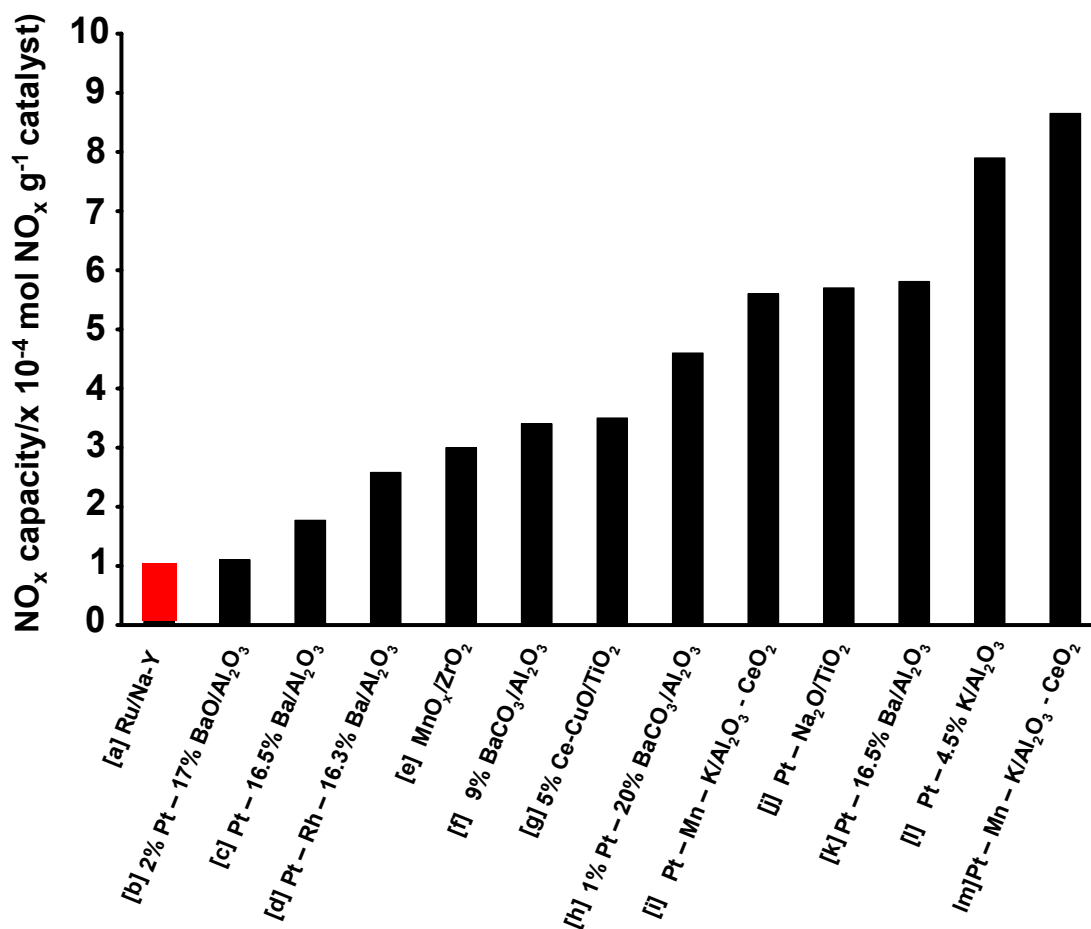

**Fig. S3** Comparison of the NO<sub>x</sub> adsorption capacity of the Ru/Na-Y zeolite with literature data on alternative formulations.<sup>1,5,7</sup> Feed gas comprised at least NO and O<sub>2</sub>. The reaction temperatures were [a] 275 °C; [b]<sup>2</sup> 300 °C; [c]<sup>3</sup> 200 °C; [d]<sup>4</sup> 300 °C; [e]<sup>5</sup> 200 °C; [f]<sup>6</sup> 400 °C; [g]<sup>7</sup> 200 °C; [h]<sup>8</sup> 350 °C; [i]<sup>9</sup> 200 °C; [j]<sup>10</sup> 300 °C; [k]<sup>3</sup> 300 °C; [l]<sup>11</sup> 250 °C; [m]<sup>9</sup> 300 °C.

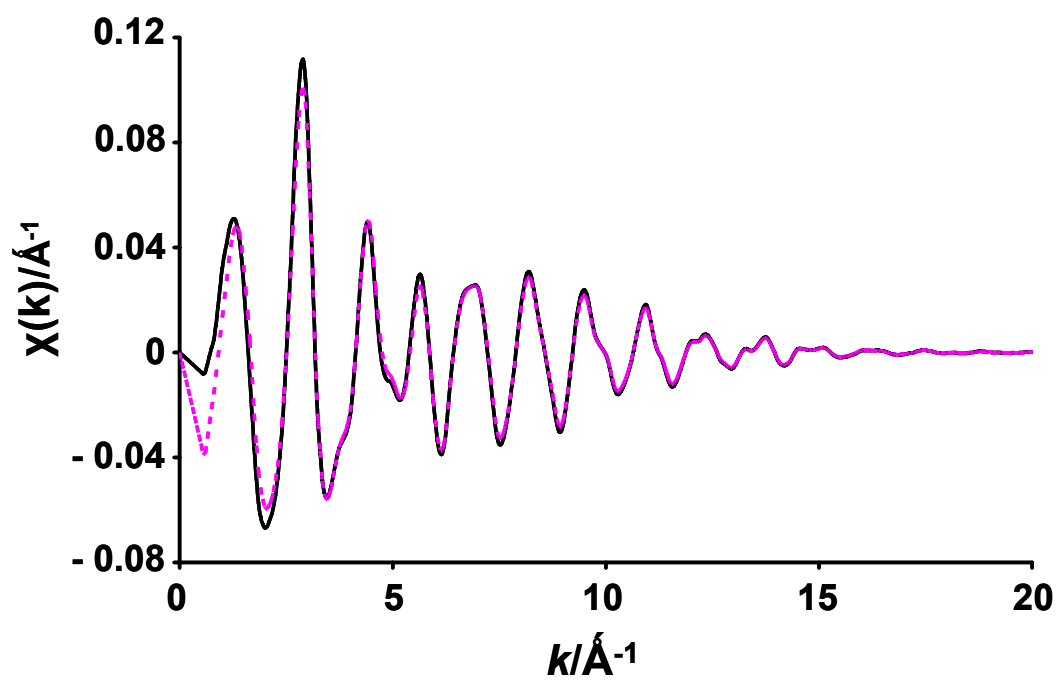

Fig. S4 Experimentally  $\chi(k)$  EXAFS function of the Ru(3%)/Na-Y sample after  $\text{NO}_x$  saturation (—) and after regeneration (---) at the Ru K-edge.

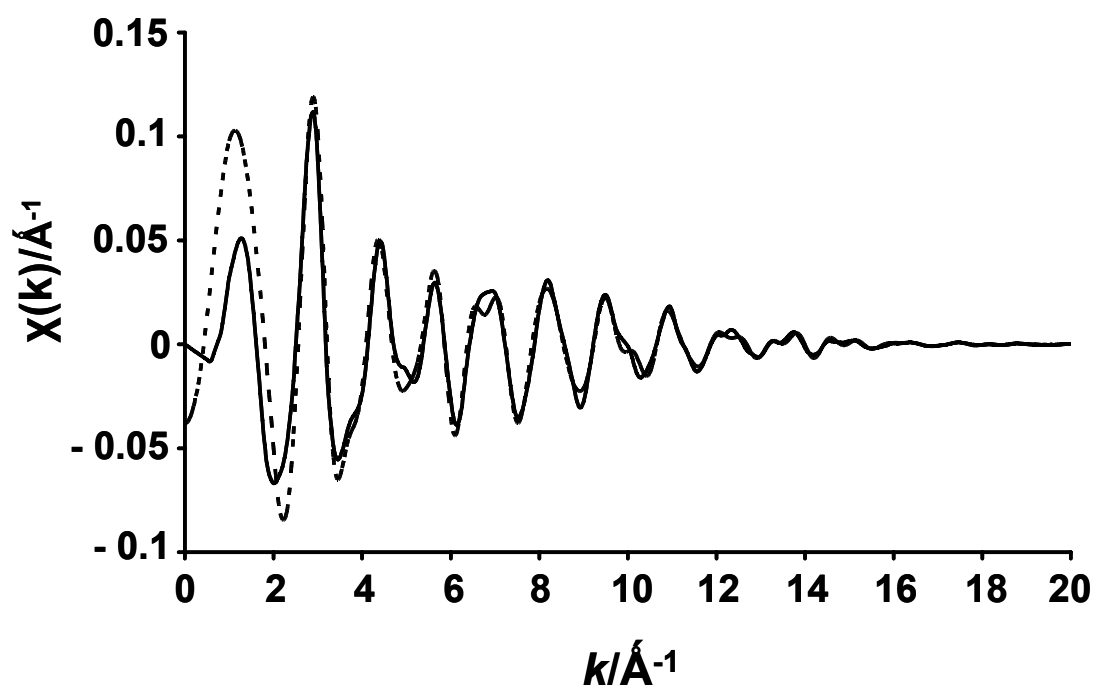

**Fig. S5** Experimentally (—) and calculated (---)  $\chi(k)$  EXAFS function of the  $\text{NO}_x$  saturated Ru(3%)/Na-Y sample at the Ru K-edge.

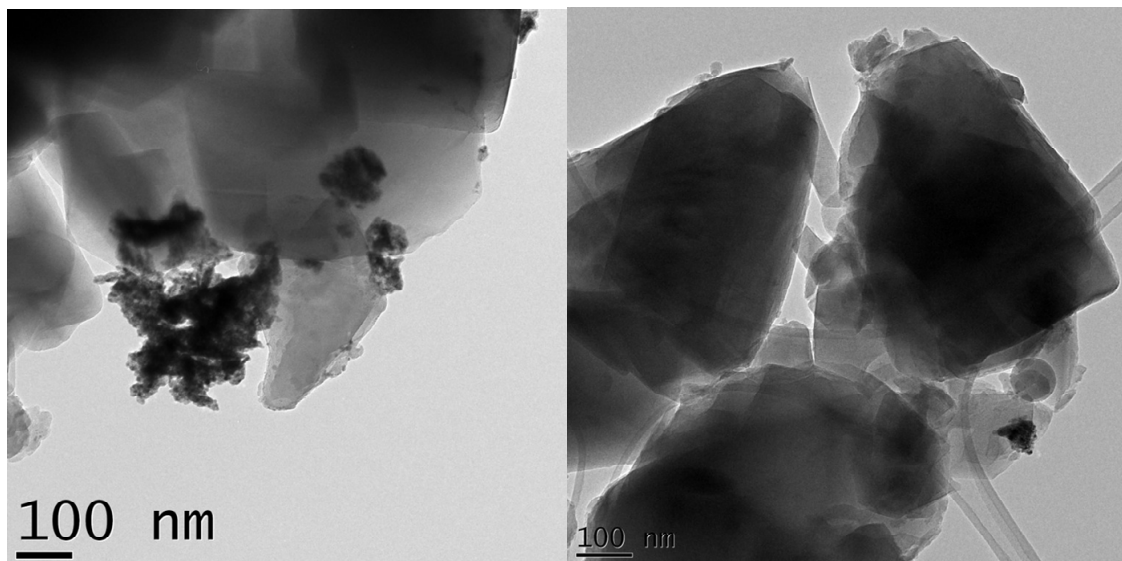

**Fig S6** TEM images of NO<sub>x</sub> saturated Ru(1%)/Na-Y zeolite.

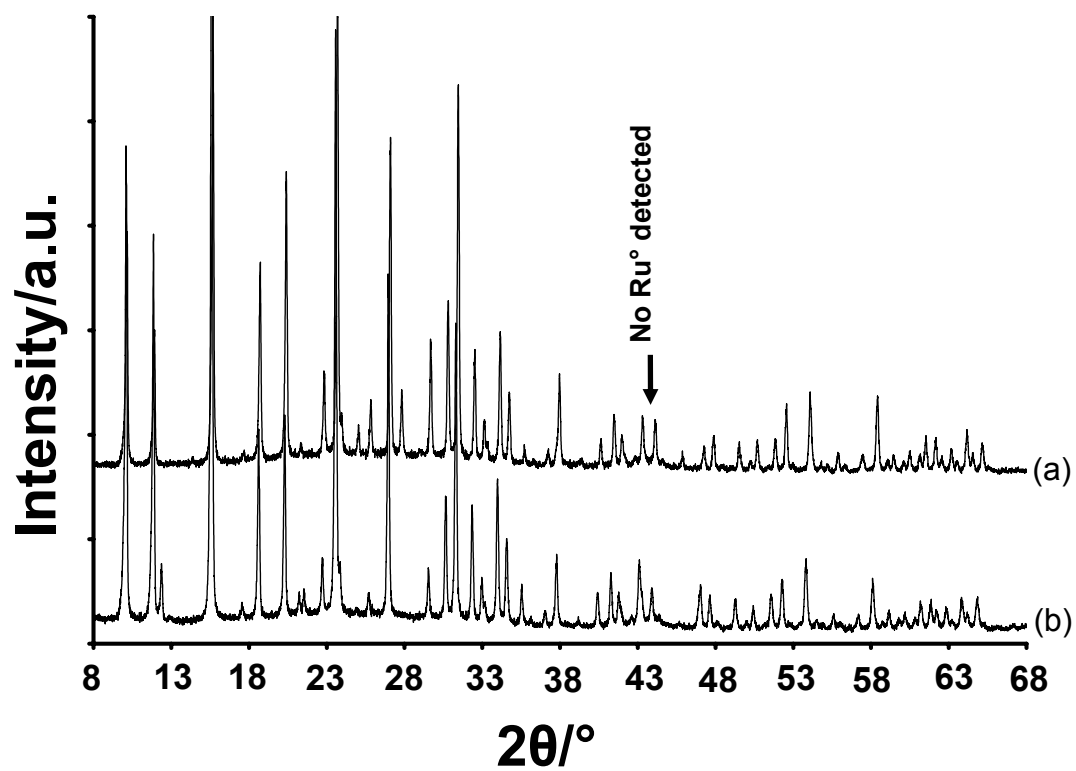

Fig S7 XRD pattern of Ru(1%)/Na-Y after (a) NO<sub>x</sub> saturation and after (b) NO<sub>x</sub> release.



### **Strategy of Rietveld refinement**

Refinement of the structures occurred as follows: At first the structure cycled in oxidising conditions only, after desorption of NO<sub>x</sub> was investigated. This pattern resembled the data obtained in absence of Ruthenium rather closely. The positions of the framework atoms were obtained from the IZA website. Right from the start sodium cations were included on typical positions SII and SI' and SII'. SI was not occupied, as it is known from literature this site is unfavourable for Na<sup>+</sup>. Typical publications in literature are for example <sup>12, 13, 14</sup>. Initially, the framework positions were kept fixed, while background, profileshape, unit cell scaling and cation position and occupation were refined. In a second step the environment of the SII cation was inspected on observed and difference electron density Fourier maps. Electron density at a distance of around 2.3-2.4 Å, typical for Na<sup>+</sup>-oxygen distances, was assigned to water. The obtained positions for water were found to be in accordance with literature on the water surrounding Na<sup>+</sup> on SII and SII\* positions in Faujasite<sup>15,16,17,18</sup>. After inclusion of these positions and refinement, not all sodium ions and water molecules in the structure were accounted for. Further typical sites like SIII, and SV were inspected for residual electron density. SV sodium ions were assumed to be coordinated with water and at first included as rigid bodies describing an octahedron of oxygen molecules centred by a sodium ion. Orientation and occupation of this rigid body was refined while the SIII position initially was kept fixed and at later stages left free to refinement. The obtained result closely resembled structures observed previously in samples without Ruthenium, with water molecules pointing towards the sodium ions on SIII<sup>17,18</sup>. The orientation of the SV-rigid body was then inspected for symmetry and replaced by water and sodium atoms on the respective positions. Initially occupation numbers of water molecules around SV and the corresponding Na<sup>+</sup> were constrained but later left to refinement. Refinement of this model resulted in a reasonable agreement between chemical composition and occupation factors. Also the octahedral environment of the sodium ions on SV far removed from the zeolite framework was essentially retained. At this point the Fourier maps were inspected for possible positions of the Ruthenium ions. Electron density on SI finally was assigned to this species and refinement of the occupation number resulted in good agreement with the actual content of this cation in the material. As final step in all structure refinements the framework atoms were left to refine. Bond angles and distances refined to typical values for faujasite frameworks even though the temperature factors were treated as isotropic.

This structure then served as starting parameters for refinement of the sample cycled in absence of hydrogen after NO<sub>x</sub> adsorption. Already the comparison of the very similar diffraction patterns indicated the structure could be described very well with this set of parameters. An attempt was made to identify a possible adsorption site for the N<sub>2</sub>O<sub>3</sub> molecule. A probable location in the vicinity of the position found in the system without Ruthenium and with similar characteristics was determined and N<sub>2</sub>O<sub>3</sub> was inserted as rigid body. Refinement of position and orientation of the molecule led to a slight improvement of the goodness of fit and a physically sensible position. While the very low occupation factors of the adsorbed species does not allow final proof of this adsorption site we are nonetheless confident the obtained position is close to the real situation as it also corroborates the observed reversible replacement of 2-3 water molecules by the NO<sub>x</sub>.

In a next step the samples cycled in presence of hydrogen were tackled. Already the comparison of the diffraction patterns revealed that a different decoration of the cavities in these samples was about to be encountered. Especially noteworthy was the very strong change of diffraction patterns between adsorption and desorption which – according to NMR – was directly related to a drastic change of sodium positions. Attempts to directly refine the structures with the above obtained models failed. Therefore, the same strategy as explained for samples obtained in absence of hydrogen was applied. The sample without NO<sub>x</sub> showed a similar distribution of cations compared to samples without hydrogen, except that the electron density previously assigned to SIII cations now was displaced significantly towards the framework, so that no significant interaction with water molecules around SV could be assumed. No electron density which could account for Ruthenium was found in this sample on position SI. This was in accordance with the reducing conditions used to prepare this sample, as a reduced Ru species is too large to be accommodated on this site. Furthermore, no indication for occupation of SII' by sodium was observed on Fourier maps and occupation number of any sodium inserted on this site immediately refined either to zero or caused the atom to shift either on SII or SI', or, most noteworthy, into the center of the sodalite cage. Occupation of this site by sodium is highly unlikely as sodium strongly prefers interaction with 6-rings of the framework. Accordingly, refinement of this electron density with Ruthenium was attempted and resulted in occupation factors in agreement with the chemical composition. The sample after adsorption of NO<sub>x</sub> cycled under alternating reducing and oxidising conditions was analysed next. Biggest surprise in this sample were the very low occupation of SII by sodium and the very high occupation of SV and SIII. The latter also was found considerably shifted into the cavity which also explained the comparatively low intensity of the first reflection in the powder pattern. As before, the refinement successively introduced cations and water molecules, discarding intermediate solutions which were unstable or resulted in gross deviations of known chemical composition. Finally, possible positions for Ruthenium and the guest molecule were sought. The electron density in the center of the sodalite cage assigned in the desorbed sample to Ru was not observed. Instead, similar as for the samples cycled entirely under oxidising conditions, Ru was assigned to electron density on position SI. In correspondence to the positions assumed for N<sub>2</sub>O<sub>3</sub> in previous studies the region in vicinity to SII, SIII, and SV cations was studied and the molecule was inserted on a likely site. As before the refinement remained stable and while the low occupation does not allow a final conclusion if this site is correct, the authors are confident the molecule is likely to adsorb on a site not far from the proposed structure.

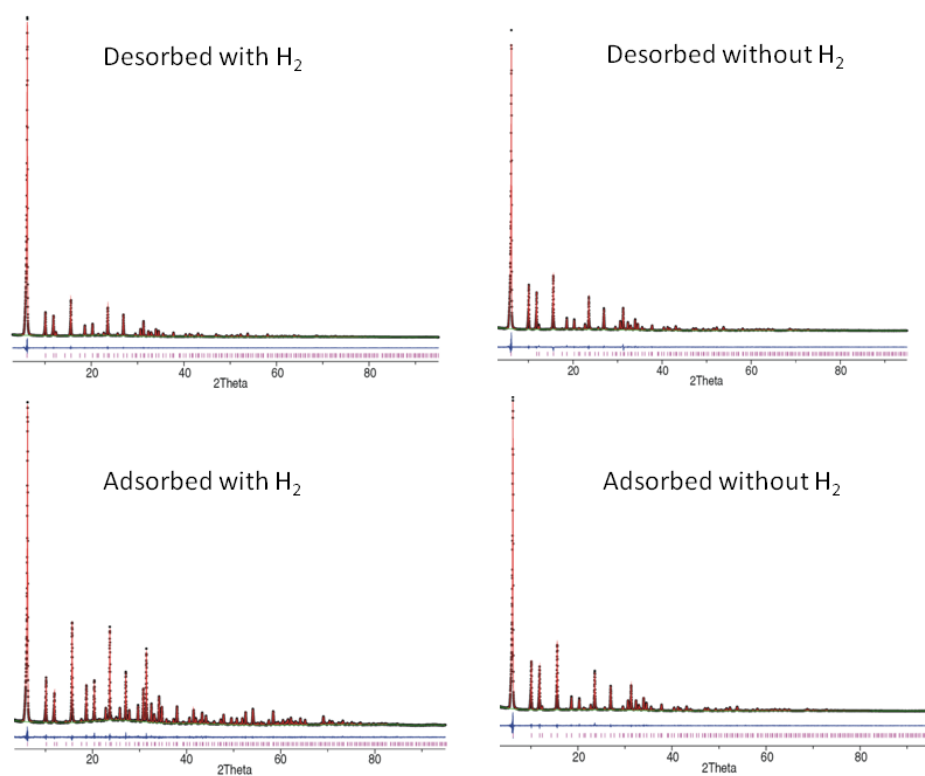

**Fig. S8** Refined XRD patterns of the Ru(1%)/Na-Y zeolite.

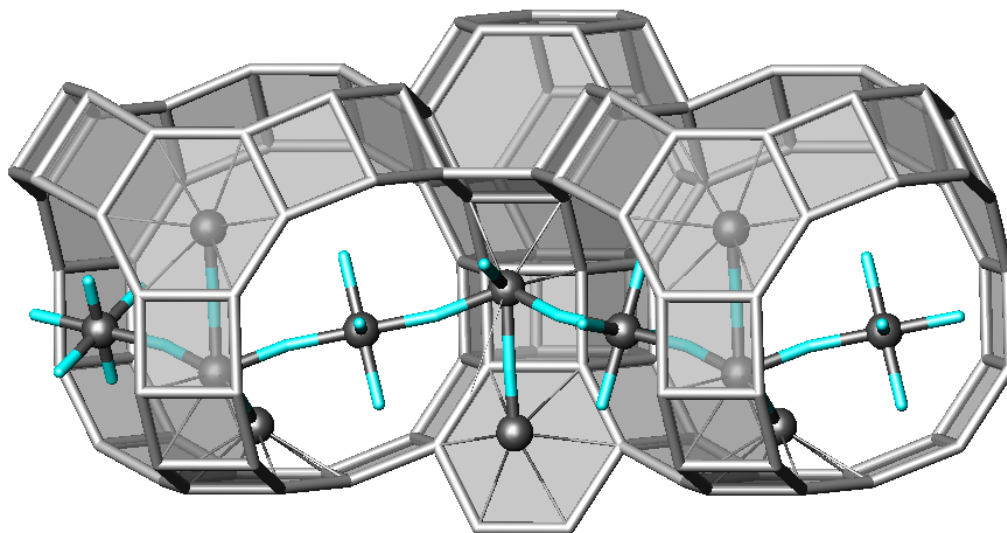

**Fig. S9** Representation of the sodium cation distribution in a Ru(1%)/Na-Y zeolite during NO<sub>x</sub> adsorption-desorption cycles without using a reducing agent during regeneration. A close contact between the frame and Na<sup>+</sup> cations on position SIII is observed.

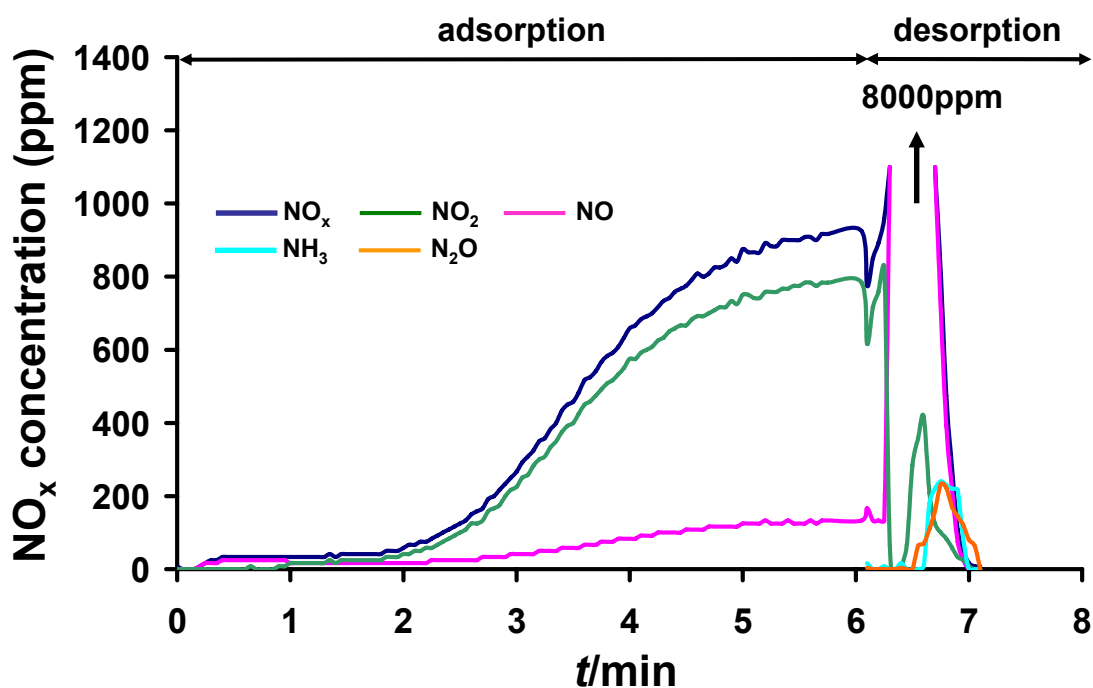

**Fig. S10** A detailed NO<sub>x</sub> adsorption-desorption pattern recorded at the outlet of a Ru(3%)/Na-Y adsorbent bed at 250 °C. The catalyst was pretreated at 450 °C for 1 h under a flow of 5% O<sub>2</sub>, 3% H<sub>2</sub>O and balance N<sub>2</sub> before adsorption-desorption cycles started. Gas composition during lean phase was 50 ppm SO<sub>2</sub>, 1000 ppm NO, 5% O<sub>2</sub>, 3% H<sub>2</sub>O and balance N<sub>2</sub>. Regeneration of the bed during rich phase was done with 1% H<sub>2</sub>, 3% H<sub>2</sub>O and balance N<sub>2</sub>. When SO<sub>x</sub> was absent in the lean phase, but present in the rich phase (50 ppm SO<sub>2</sub>), a very similar NO<sub>x</sub> adsorption-desorption pattern was obtained.

**Rietveld refinements of Ru(3%)/Na-Y samples after Ru ion-exchange and after pretreatment**

We performed Rietveld refinement in combination with analysis of difference electron density charts of the corresponding powder X-ray patterns on more samples: freshly Ru ion-exchanged sample and pretreated sample (Fig. S11). In the freshly Ru ion-exchanged sample electron density was found on SV in an octahedral environment with bond lengths typically found between Ru<sup>+3</sup> and NH<sub>3</sub> (Fig. S12). Other electron density assigned to Na<sup>+</sup> was found at position SII' in the sodalite cage and SII\* and SIII, linked by water molecules in the supercages. To become an active NO<sub>x</sub> adsorbent, the Ru ion first need to migrate into the small cage system of the zeolite. After a pretreatment at 450 °C, electron density was found in the hexagonal prism at cation position SI (Fig. S13). The sodalite cages were crowded, occupied by cations on position SI'. Other electron density was found at position SII, in the 6-ring of the sodalite cage and interacting with one water molecule, resulting in tetrahedral environment. This indicates that after a pretreatment the NH<sub>3</sub> ligands have disappeared, resulting in a redistribution of the cations in the zeolite. Ru is already found in the hexagonal prism at position SI. However, because the large number of Na<sup>+</sup> cations in the sodalite cage, some cycles are necessary to push these cations into the supercage creating the NO<sub>x</sub> adsorption site.

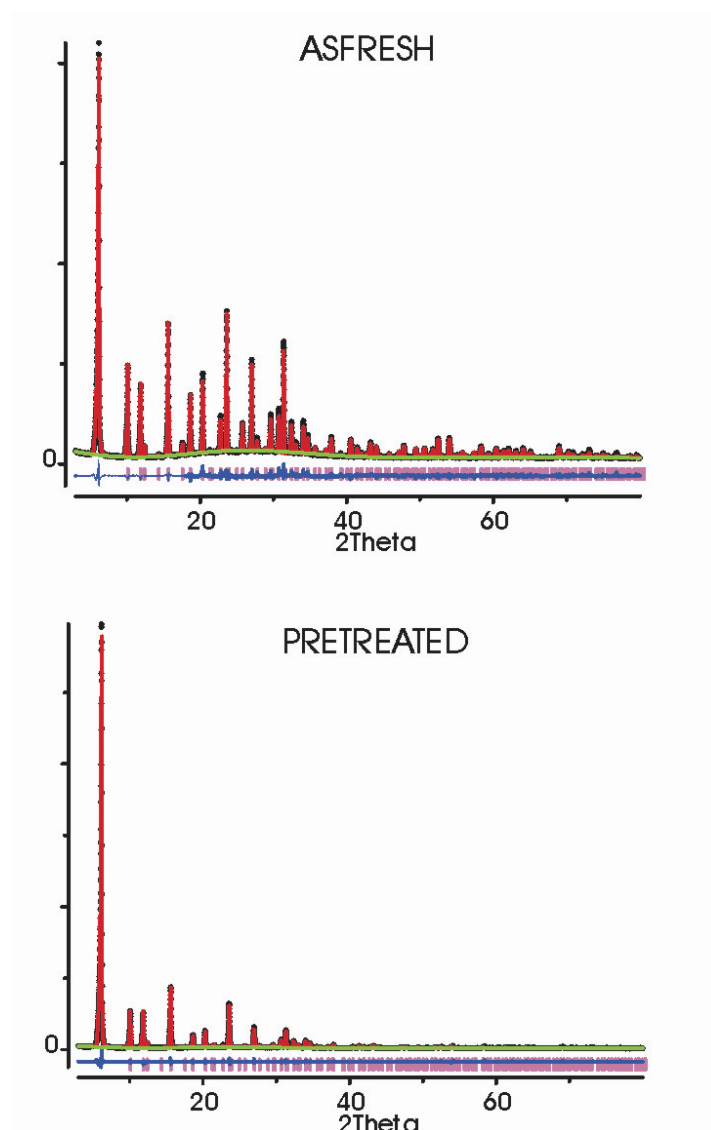

**Fig. S11** Refined XRD patterns of the Ru(3%)/Na-Y zeolite after Ru ion-exchange and after pretreatment at 450°C.

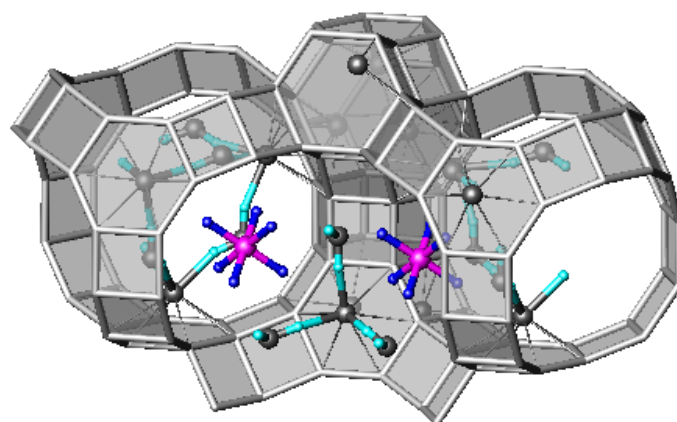

**Fig. S12** Representation of the cation distribution in a Ru(3%)/Na-Y zeolite after fresh Ru ion-exchange. Ru<sup>+3</sup> cations (purple spheres) are found on position SV in an octahedral environment. Na<sup>+</sup> cations are represented as the grey spheres and found at position SII' in the sodalite cages and SII\* and SIII in the supercages.



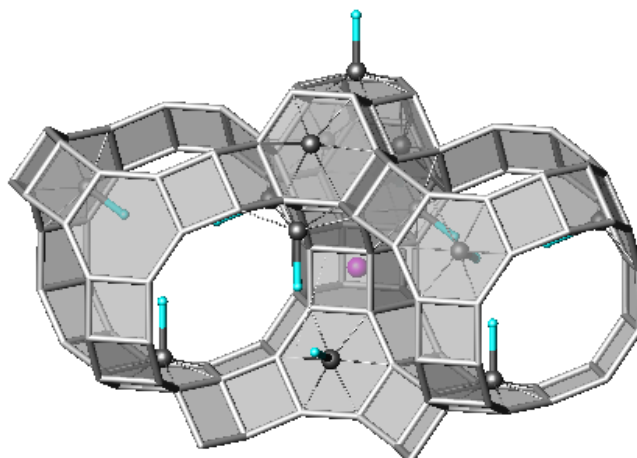

**Fig. S13** Representation of the cation distribution in a Ru(3%)/Na-Y zeolite after pretreatment at 450 °C. Ru<sup>+3</sup> cations (purple spheres) are found in the hexagonal prism at cation position SI. Na<sup>+</sup> cations are found at position SI' and at position SII in the 6-ring of the sodalite cage interacting with a water molecule, resulting in tetrahedral environment.

Table S1 EXAFS fitting parameters at the Ru K-edge for the Ru(3%)/Na-Y sample.

| <b>Abs-Sca<sup>1</sup></b> | <b>CN</b> | <b>R/Å</b>         | <b><math>\Delta \sigma^2/\text{Å}^2</math></b> |
|----------------------------|-----------|--------------------|------------------------------------------------|
| <b>Ru-Ru</b>               | <b>6</b>  | <b>2.70 ± 0.01</b> | <b>0.005 ± 0.001</b>                           |
| <b>Ru-Ru</b>               | <b>6</b>  | <b>3.78 ± 0.01</b> | <b>0.005 ± 0.001</b>                           |
| <b>Ru-Ru</b>               | <b>2</b>  | <b>4.28 ± 0.01</b> | <b>0.005 ± 0.001</b>                           |
| <b>Ru-Ru</b>               | <b>12</b> | <b>4.65 ± 0.01</b> | <b>0.005 ± 0.001</b>                           |
| <b>Ru-Ru</b>               | <b>6</b>  | <b>4.68 ± 0.01</b> | <b>0.005 ± 0.001</b>                           |
| <b>Ru-Ru</b>               | <b>12</b> | <b>5.06 ± 0.01</b> | <b>0.005 ± 0.001</b>                           |
| <b>Ru-Ru-Ru</b>            | <b>24</b> | <b>4.00 ± 0.01</b> | <b>0.005 ± 0.001</b>                           |
| <b>Ru-Ru-Ru</b>            | <b>24</b> | <b>5.00 ± 0.01</b> | <b>0.005 ± 0.001</b>                           |
| <b>Ru-Ru-Ru</b>            | <b>24</b> | <b>5.04 ± 0.01</b> | <b>0.005 ± 0.001</b>                           |
| <b>Ru-Ru-Ru</b>            | <b>12</b> | <b>5.06 ± 0.01</b> | <b>0.005 ± 0.001</b>                           |

<sup>1</sup>Abbreviations: Abs-Sca: Absorber – Scatterer, CN: coordination number,

R: interatomic distance,  $\Delta\sigma^2$ : Debye-Waller factor

Fit: R-space,  $2.5 \text{ Å}^{-1} < k < 19.2 \text{ Å}^{-1}$  and  $1.39 \text{ Å} < R < 5.83 \text{ Å}$

$S_0^2$ :  $0.82 \pm 0.05$

$\Delta E_0$ :  $-7.0 \pm 0.5 \text{ eV}$

R-factor: 0.05

**Table S2** Rietveld parameters for the refined Ru(1%)/Na-Y structures.

| Rietveld parameters | Ru(1%)/Na-Y                        |             |                                  |         |
|---------------------|------------------------------------|-------------|----------------------------------|---------|
|                     | With H <sub>2</sub> during cycling |             | No H <sub>2</sub> during cycling |         |
|                     | NO <sub>x</sub> saturated          | regenerated | NO <sub>x</sub> saturated        |         |
| R <sub>p</sub>      | 0.0342                             | 0.0318      | 0.0407                           | 0.0444  |
| R <sub>wp</sub>     | 0.0486                             | 0.0431      | 0.0550                           | 0.0606  |
| R <sub>e</sub>      | 0.0442                             | 0.043       | 0.0599                           | 0.0598  |
| R <sub>F</sub>      | 0.0982                             | 0.105       | 0.12834                          | 0.11349 |
| χ <sup>2</sup>      | 0.93                               | 1.01        | 0.92                             | 1.02    |

**Table S3** CIF files for Ru(1%)/Na-Y zeolite after (a) NO<sub>x</sub> saturation and after (b) NO<sub>x</sub> regeneration. H<sub>2</sub> was used during regeneration.

(a)

data\_ADShREV2\_publ

```
_pd_block_id
2010-08-06T09:28|ADShREV2|ceak|stadip

_audit_creation_method "from EXP file using GSAS2CIF"
_audit_creation_date      2010-08-06T09:28
_audit_author_name       ceak
_audit_update_record
; 2010-08-06T09:28 Initial CIF as created by GSAS2CIF
:
_refine_ls_shift/su_max   0.92
_refine_ls_shift/su_mean  0.07
_computing_structure_refinement  GSAS
_refine_ls_number_parameters  57
_refine_ls_goodness_of_fit_all  0.93
_refine_ls_number_restraints  0
_refine_ls_matrix_type      full
```

```
_pd_phase_name
"Ru1% NaY adsorbed NOx with H2"
_cell_length_a      24.60508(8)
_cell_length_b      24.60508
_cell_length_c      24.60508
_cell_angle_alpha   90.0
_cell_angle_beta    90.0
_cell_angle_gamma   90.0
_cell_volume        14896.16(14)
_symmetry_cell_setting  cubic
_symmetry_space_group_name_H-M  "F d -3 m"
```

loop\_

```
_atom_site_type_symbol
_atom_site_label
_atom_site_fract_x
_atom_site_fract_y
_atom_site_fract_z
_atom_site_occupancy
_atom_site_thermal_displace_type
_atom_site_U_iso_or_equiv
_atom_site_symmetry_multiplicity
O
O1  0.89306(10) 0.10694(10) 0.0      1.0      Uiso  0.0017(5)  96
O
O2  0.96580(18) 0.07523(12) 0.07523(12) 1.0      Uiso  0.0017(5)  96
O
O3  0.99602(13) 0.14239(14) 0.99602(13) 1.0      Uiso  0.0017(5)  96
O
O4  0.92629(16) 0.17841(12) 0.07159(12) 1.0      Uiso  0.0017(5)  96
Si
```

**Supplementary Material (ESI) for Chemical Science**  
**This journal is (c) The Royal Society of Chemistry 2010**

|                          |             |             |             |                                |      |             |     |
|--------------------------|-------------|-------------|-------------|--------------------------------|------|-------------|-----|
| T1                       | 0.94578(6)  | 0.12757(6)  | 0.03571(6)  | 1.0                            | Uiso | 0.00133(26) | 192 |
| O                        |             |             |             |                                |      |             |     |
| ow1                      | 0.3087(8)   | 0.3087(8)   | 0.5405(17)  | 0.1773(21)                     | Uiso | 0.096(8)    | 96  |
| Na                       |             |             |             |                                |      |             |     |
| Sii'                     | 0.17289(26) | 0.17289(26) | 0.17289(26) | 0.507(10)                      | Uiso | 0.101(7)    | 32  |
| Na                       |             |             |             |                                |      |             |     |
| Si'                      | 0.07344(29) | 0.07344(29) | 0.07344(29) | 0.469(10)                      | Uiso | 0.055(6)    | 32  |
| Na                       |             |             |             |                                |      |             |     |
| siii                     | 0.375       | 0.375       | 0.5098(12)  | 0.1773(21)                     | Uiso | 0.101(14)   | 48  |
| Na                       |             |             |             |                                |      |             |     |
| sV                       | 0.5         | 0.5         | 0.5         | 0.532(6)                       | Uiso | 0.056(6)    | 16  |
| Ru                       |             |             |             |                                |      |             |     |
| ru                       | 0.0         | 0.0         | 0.0         | 0.0639(27)                     | Uiso | 0.071(28)   | 16  |
| O                        |             |             |             |                                |      |             |     |
| ow2                      | 0.3171(12)  | 0.3171(12)  | 0.2274(21)  | 0.185(11)                      | Uiso | 0.089(18)   | 96  |
| N                        |             |             |             |                                |      |             |     |
| n1                       | 0.247(7)    | 0.398(11)   | 0.454(10)   | 0.0212(21)                     | Uiso | 0.025       | 192 |
| N                        |             |             |             |                                |      |             |     |
| n2                       | 0.299(9)    | 0.346(5)    | 0.437(10)   | 0.0219(12)                     | Uiso | 0.025       | 192 |
| N                        |             |             |             |                                |      |             |     |
| on1                      | 0.270(5)    | 0.438(6)    | 0.456(8)    | 0.0219(12)                     | Uiso | 0.025       | 192 |
| N                        |             |             |             |                                |      |             |     |
| on2                      | 0.345(10)   | 0.363(6)    | 0.432(7)    | 0.0219(12)                     | Uiso | 0.025       | 192 |
| N                        |             |             |             |                                |      |             |     |
| on3                      | 0.282(6)    | 0.300(9)    | 0.432(5)    | 0.0219(12)                     | Uiso | 0.025       | 192 |
| O                        |             |             |             |                                |      |             |     |
| ow3                      | 0.375       | 0.375       | 0.4221(18)  | 0.1780(12)                     | Uiso | 0.09(4)     | 48  |
| O                        |             |             |             |                                |      |             |     |
| ow4                      | 0.375       | 0.375       | 0.6000(15)  | 0.170(9)                       | Uiso | 0.085(25)   | 48  |
| O                        |             |             |             |                                |      |             |     |
| ow5                      | 0.2457(11)  | 0.2457(11)  | 0.5903(15)  | 0.1774(21)                     | Uiso | 0.090(8)    | 96  |
| O                        |             |             |             |                                |      |             |     |
| ow6                      | 0.4405(9)   | 0.5595(9)   | 0.5         | 0.1774(21)                     | Uiso | 0.090(8)    | 96  |
| Na                       |             |             |             |                                |      |             |     |
| SII                      | 0.251(4)    | 0.251(4)    | 0.251(4)    | 0.0353(21)                     | Uiso | 0.090(8)    | 32  |
| _chemical_formula_sum    |             |             |             | "N0.11 Na0.26 O2.45 Ru0.01 Si" |      |             |     |
| _chemical_formula_weight |             |             |             | 74.94                          |      |             |     |
| _cell_formula_units_Z    |             |             |             | 192                            |      |             |     |

```

loop__atom_type_symbol
  _atom_type_number_in_cell
  _atom_type_scatter_dispersion_real
  _atom_type_scatter_dispersion_imag
  _atom_type_scatter_Cromer_Mann_a1
  _atom_type_scatter_Cromer_Mann_a2
  _atom_type_scatter_Cromer_Mann_a3
  _atom_type_scatter_Cromer_Mann_a4
  _atom_type_scatter_Cromer_Mann_b1
  _atom_type_scatter_Cromer_Mann_b2
  _atom_type_scatter_Cromer_Mann_b3
  _atom_type_scatter_Cromer_Mann_b4
  _atom_type_scatter_Cromer_Mann_c
  _atom_type_scatter_source

```

Supplementary Material (ESI) for Chemical Science  
This journal is (c) The Royal Society of Chemistry 2010

```
O      469.58  0.000  0.000
3.04850 13.2771 2.28680 5.70110 1.54630 0.32390 0.86700 32.9089 0.25080
International_Tables_Vol_C
Si     192.0   0.000  0.000
6.29150 2.43860 3.03530 32.3337 1.98910 0.67850 1.54100 81.6937 1.14070
International_Tables_Vol_C
Na     49.389  0.000  0.000
4.76260 3.28500 3.17360 8.84220 1.26740 0.31360 1.11280 129.424 0.67600
International_Tables_Vol_C
Ru     1.022   0.000  0.000
19.2674 0.80852 12.9182 8.43467 4.86337 24.7997 1.56756 94.2928 5.37874
International_Tables_Vol_C
N      20.869  0.000  0.000
12.2126 0.00570 3.13220 9.89330 2.01250 28.9975 1.16630 0.58260 -11.529
International_Tables_Vol_C
_diffn_radiation_probe      x-ray
_diffn_radiation_polarisn_ratio  0.0
_diffn_radiation_wavelength    1.5405
_diffn_radiation_type         Cu_K\alpha~1~
_pd_proc_ls_prof_R_factor      0.0342
_pd_proc_ls_prof_wR_factor     0.0486
_pd_proc_ls_prof_wR_expected   0.0442
_refine_ls_R_Fsqd_factor      0.09816

_pd_proc_ls_background_function
; GSAS Background function number 1 with 20 terms.
Shifted Chebyshev function of 1st kind
  1: 263.659  2: -132.615  3: 22.6845  4: 24.5332
  5: -17.5921 6: -31.2151 7: 43.6860  8: -14.6541
  9: -1.82601 10: 10.9365 11: -12.5844 12: -1.62933
 13: 9.25131 14: -15.1842 15: 0.557432 16: 7.62129
 17: -2.06372 18: 1.86382 19: 7.24730 20: 1.59525
;

_pd_spec_mounting
;sealed glass capillary 1mm outer diameter packing density 50%
;
_pd_spec_mount_mode      'transmission'
_pd_spec_shape           'cylinder'
_exptl_absorpt_process_details
; GSAS Absorption/surface roughness correction: function number 0
Debye-Scherrer absorption correction
Term (= MU.r/wave) =    3.0000
Correction is not refined.
;
_exptl_absorpt_correction_T_min    0.00381
_exptl_absorpt_correction_T_max    0.03700

_pd_proc_ls_profile_function
;
CW Profile function number 3 with 19 terms
Pseudovoigt profile coefficients as parameterized in
P. Thompson, D.E. Cox & J.B. Hastings (1987). J. Appl. Cryst.,20,79-83.
Asymmetry correction of L.W. Finger, D.E. Cox & A. P. Jephcoat (1994).
J. Appl. Cryst.,27,892-900.
#1(GU) = 9.816 #2(GV) = 32.491 #3(GW) = 1.438
```

Supplementary Material (ESI) for Chemical Science  
This journal is (c) The Royal Society of Chemistry 2010

#4(GP) = 3.633 #5(LX) = 2.885 #6(LY) = 1.756  
#7(S/L) = 0.0266 #8(H/L) = 0.0274  
#9(trns) = 0.00 #10(shft) = 0.0000  
#11(stec) = 0.00 #12(pte) = 0.00 #13(sfec) = 0.00  
#14(L11) = 0.054 #15(L22) = 0.138 #16(L33) = -0.161  
#17(L12) = -0.082 #18(L13) = 0.008 #19(L23) = 0.081  
Peak tails are ignored where the intensity is below 0.0010 times the peak  
Aniso. broadening axis 0.0 0.0 1.0

;  
\_pd\_proc\_ls\_peak\_cutoff 0.00100  
\_pd\_proc\_info\_datetime 2010-08-06T09:28:53  
\_pd\_calc\_method "Rietveld Refinement"

\_pd\_meas\_2theta\_range\_min 3.41  
\_pd\_meas\_2theta\_range\_max 95.0  
\_pd\_meas\_2theta\_range\_inc 0.01  
\_pd\_proc\_2theta\_range\_min 3.39792  
\_pd\_proc\_2theta\_range\_max 94.98792  
\_pd\_proc\_2theta\_range\_inc 0.01

loop\_  
\_refln\_index\_h  
\_refln\_index\_k  
\_refln\_index\_l  
\_refln\_observed\_status  
\_refln\_F\_squared\_meas  
\_refln\_F\_squared\_calc  
\_refln\_phase\_calc  
\_refln\_d\_spacing  
\_gsas\_i100\_meas  
1 1 1 o 1382589.4 1373154.3 180.00 14.20575 100.00  
2 2 0 o 264332.00 260189.44 0.00 8.69921 11.68  
3 1 1 o 118604.48 119938.63 0.00 7.41871 7.99  
2 2 2 o 11187.445 10754.289 0.00 7.10287 0.23  
4 0 0 o 40595.34 34839.734 180.00 6.15127 0.50  
3 3 1 o 621576.6 630092.8 180.00 5.64479 26.88  
4 2 2 o 17030.764 16207.318 0.00 5.02249 0.61  
5 1 1 o 255227.61 252875.28 0.00 4.73525 8.48  
3 3 3 o 64255.17 63677.49 0.00 4.73525 0.72  
4 4 0 o 627228.4 597319.8 180.00 4.34960 9.17  
4 4 2 o 10676.085 10470.126 180.00 4.10085 0.28  
5 3 1 o 4101.588 3591.914 0.00 4.15902 0.23  
6 2 0 o 109159.76 105059.59 0.00 3.89040 2.73  
5 3 3 o 877998.6 872803.1 180.00 3.75224 20.73  
6 2 2 o 16585.871 15232.650 0.00 3.70936 0.38  
4 4 4 o 77614.30 71672.70 180.00 3.55144 0.57  
7 1 1 o 7961.906 8227.182 180.00 3.44540 0.17  
5 5 1 o 144841.67 149594.80 0.00 3.44540 3.04  
6 4 2 o 299289.44 294806.78 180.00 3.28799 11.67  
5 5 3 o 10968.317 10682.683 180.00 3.20331 0.20  
7 3 1 o 56833.21 55232.16 0.00 3.20331 2.14  
8 0 0 o 20650.693 12569.461 180.00 3.07564 0.09  
7 3 3 o 222379.66 208791.58 180.00 3.00599 3.82  
6 4 4 o 2626.077 2491.409 180.00 2.98380 0.04  
8 2 2 o 198269.22 199133.20 0.00 2.89974 3.25

Supplementary Material (ESI) for Chemical Science  
This journal is (c) The Royal Society of Chemistry 2010

|    |   |   |   |           |           |        |         |       |
|----|---|---|---|-----------|-----------|--------|---------|-------|
| 6  | 6 | 0 | o | 619646.9  | 623163.6  | 0.00   | 2.89974 | 5.06  |
| 6  | 6 | 2 | o | 2006.788  | 1974.021  | 0.00   | 2.82240 | 0.03  |
| 7  | 5 | 1 | o | 54328.63  | 54188.55  | 0.00   | 2.84115 | 1.71  |
| 5  | 5 | 5 | o | 2991939.3 | 2984181.5 | 180.00 | 2.84115 | 15.67 |
| 9  | 1 | 1 | o | 56418.07  | 55738.55  | 0.00   | 2.70076 | 0.82  |
| 8  | 4 | 0 | o | 271118.53 | 262712.13 | 0.00   | 2.75093 | 4.10  |
| 7  | 5 | 3 | o | 47261.43  | 46857.71  | 0.00   | 2.70076 | 1.39  |
| 8  | 4 | 2 | o | 23827.662 | 23270.939 | 0.00   | 2.68463 | 0.67  |
| 6  | 6 | 4 | o | 552509.2  | 556719.9  | 180.00 | 2.62291 | 7.79  |
| 9  | 3 | 1 | o | 156342.75 | 158206.42 | 0.00   | 2.57931 | 4.28  |
| 7  | 7 | 1 | o | 3792.458  | 3596.323  | 0.00   | 2.47290 | 0.04  |
| 8  | 4 | 4 | o | 69320.98  | 69289.43  | 0.00   | 2.51125 | 0.94  |
| 9  | 3 | 3 | o | 950.759   | 904.032   | 180.00 | 2.47290 | 0.01  |
| 7  | 5 | 5 | o | 23968.391 | 22995.740 | 180.00 | 2.47290 | 0.34  |
| 8  | 6 | 2 | o | 26929.551 | 27120.621 | 0.00   | 2.41273 | 0.71  |
| 10 | 2 | 0 | o | 37068.16  | 37158.87  | 0.00   | 2.41273 | 0.43  |
| 7  | 7 | 3 | o | 16647.758 | 16019.349 | 0.00   | 2.37866 | 0.21  |
| 10 | 2 | 2 | o | 17045.570 | 16752.359 | 180.00 | 2.36762 | 0.20  |
| 9  | 5 | 1 | o | 21158.240 | 20504.016 | 0.00   | 2.37866 | 0.51  |
| 6  | 6 | 6 | o | 1057343.3 | 1043566.8 | 0.00   | 2.36762 | 4.04  |
| 8  | 6 | 4 | o | 18464.668 | 18554.021 | 180.00 | 2.28452 | 0.39  |
| 9  | 5 | 3 | o | 15148.684 | 15040.277 | 180.00 | 2.29444 | 0.30  |
| 11 | 1 | 1 | o | 79574.24  | 80255.80  | 180.00 | 2.21857 | 0.89  |
| 10 | 4 | 2 | o | 467.135   | 464.639   | 0.00   | 2.24613 | 0.01  |
| 7  | 7 | 5 | o | 85383.19  | 86262.98  | 0.00   | 2.21857 | 0.89  |
| 8  | 8 | 0 | o | 763459.1  | 779626.9  | 0.00   | 2.17480 | 3.68  |
| 8  | 8 | 2 | o | 3162.710  | 2927.732  | 180.00 | 2.14160 | 0.03  |
| 11 | 3 | 1 | o | 49810.27  | 48265.34  | 180.00 | 2.14976 | 0.99  |
| 9  | 7 | 1 | o | 16218.581 | 15782.628 | 0.00   | 2.14976 | 0.30  |
| 9  | 5 | 5 | o | 7883.169  | 7674.750  | 180.00 | 2.14976 | 0.08  |
| 10 | 4 | 4 | o | 14699.570 | 13602.644 | 0.00   | 2.14160 | 0.14  |
| 12 | 0 | 0 | o | 187698.53 | 175610.56 | 180.00 | 2.05042 | 0.46  |
| 8  | 6 | 6 | o | 2957.958  | 2995.686  | 0.00   | 2.10987 | 0.03  |
| 9  | 7 | 3 | o | 51328.37  | 50171.12  | 180.00 | 2.08698 | 0.96  |
| 11 | 3 | 3 | o | 253735.70 | 251862.00 | 0.00   | 2.08698 | 2.23  |
| 10 | 6 | 0 | o | 72296.48  | 73882.20  | 0.00   | 2.10987 | 0.71  |
| 8  | 8 | 4 | o | 262347.94 | 248715.73 | 180.00 | 2.05042 | 2.36  |
| 10 | 6 | 2 | o | 11189.457 | 11340.618 | 180.00 | 2.07951 | 0.20  |
| 7  | 7 | 7 | o | 50190.54  | 46569.44  | 0.00   | 2.02939 | 0.14  |
| 12 | 2 | 2 | o | 1910.988  | 1813.560  | 180.00 | 1.99574 | 0.02  |
| 11 | 5 | 1 | o | 12066.240 | 11162.248 | 0.00   | 2.02939 | 0.22  |
| 10 | 6 | 4 | o | 8371.099  | 8161.130  | 0.00   | 1.99574 | 0.14  |
| 9  | 7 | 5 | o | 45297.14  | 44761.68  | 180.00 | 1.97633 | 0.76  |
| 11 | 5 | 3 | o | 278.942   | 276.234   | 180.00 | 1.97633 | 0.00  |
| 12 | 4 | 0 | o | 6290.609  | 5795.040  | 180.00 | 1.94520 | 0.05  |
| 9  | 9 | 1 | o | 30657.766 | 30931.377 | 180.00 | 1.92722 | 0.22  |
| 8  | 8 | 6 | o | 137125.33 | 137501.25 | 0.00   | 1.92133 | 1.04  |
| 12 | 4 | 2 | o | 25322.066 | 25429.941 | 0.00   | 1.92133 | 0.38  |
| 13 | 1 | 1 | o | 3313.388  | 3124.144  | 180.00 | 1.88160 | 0.02  |
| 9  | 9 | 3 | o | 18204.217 | 17184.619 | 0.00   | 1.88160 | 0.14  |
| 10 | 8 | 2 | o | 193387.92 | 198565.19 | 0.00   | 1.89832 | 2.92  |
| 11 | 5 | 5 | o | 247.653   | 219.879   | 0.00   | 1.88160 | 0.00  |
| 11 | 7 | 1 | o | 2160.061  | 2064.480  | 0.00   | 1.88160 | 0.03  |
| 10 | 6 | 6 | o | 1628.776  | 1366.812  | 180.00 | 1.87612 | 0.01  |
| 12 | 4 | 4 | o | 28084.170 | 27477.434 | 0.00   | 1.85468 | 0.21  |
| 13 | 3 | 1 | o | 53188.32  | 53659.70  | 180.00 | 1.83907 | 0.75  |



Supplementary Material (ESI) for Chemical Science  
This journal is (c) The Royal Society of Chemistry 2010

|    |    |   |   |           |           |        |         |      |
|----|----|---|---|-----------|-----------|--------|---------|------|
| 10 | 8  | 4 | o | 36877.28  | 37224.39  | 180.00 | 1.83395 | 0.50 |
| 11 | 7  | 3 | o | 17036.920 | 17244.787 | 0.00   | 1.83907 | 0.24 |
| 9  | 7  | 7 | o | 118642.31 | 120581.61 | 0.00   | 1.83907 | 0.82 |
| 9  | 9  | 5 | o | 322328.66 | 321842.16 | 0.00   | 1.79930 | 2.09 |
| 12 | 6  | 2 | o | 30568.521 | 29467.717 | 180.00 | 1.81391 | 0.42 |
| 13 | 3  | 3 | o | 14776.219 | 14772.984 | 0.00   | 1.79930 | 0.10 |
| 8  | 8  | 8 | o | 209413.56 | 208340.17 | 0.00   | 1.77572 | 0.44 |
| 14 | 2  | 0 | o | 136121.75 | 135421.59 | 180.00 | 1.73984 | 0.83 |
| 11 | 7  | 5 | o | 118857.17 | 117955.80 | 180.00 | 1.76201 | 1.48 |
| 13 | 5  | 1 | o | 31113.861 | 30894.359 | 180.00 | 1.76201 | 0.39 |
| 12 | 6  | 4 | o | 11485.400 | 11270.489 | 180.00 | 1.75751 | 0.14 |
| 14 | 2  | 2 | o | 17749.762 | 17040.813 | 0.00   | 1.72270 | 0.10 |
| 10 | 8  | 6 | o | 11856.271 | 11846.711 | 0.00   | 1.73984 | 0.14 |
| 10 | 10 | 2 | o | 8525.201  | 8192.695  | 0.00   | 1.72270 | 0.05 |
| 10 | 10 | 0 | o | 997148.6  | 998792.4  | 180.00 | 1.73984 | 2.98 |
| 13 | 5  | 3 | o | 1006.898  | 961.412   | 180.00 | 1.72694 | 0.02 |
| 11 | 9  | 1 | o | 21259.563 | 20526.049 | 180.00 | 1.72694 | 0.25 |
| 11 | 9  | 3 | o | 474630.1  | 477624.7  | 180.00 | 1.69388 | 5.17 |
| 9  | 9  | 7 | o | 2049.595  | 2061.256  | 0.00   | 1.69388 | 0.01 |
| 10 | 10 | 4 | o | 654.353   | 621.600   | 180.00 | 1.67416 | 0.00 |
| 12 | 8  | 0 | o | 11096.272 | 10567.970 | 0.00   | 1.70606 | 0.06 |
| 12 | 8  | 2 | o | 59049.46  | 59601.84  | 180.00 | 1.68988 | 0.63 |
| 14 | 4  | 2 | o | 13975.672 | 13344.466 | 180.00 | 1.67416 | 0.15 |
| 12 | 6  | 6 | o | 43096.34  | 41298.38  | 180.00 | 1.67416 | 0.24 |
| 15 | 1  | 1 | o | 782.882   | 761.439   | 180.00 | 1.63310 | 0.00 |
| 13 | 7  | 1 | o | 2592.607  | 2582.942  | 180.00 | 1.66266 | 0.03 |
| 13 | 5  | 5 | o | 1618.579  | 1604.635  | 0.00   | 1.66266 | 0.01 |
| 11 | 7  | 7 | o | 110878.66 | 110592.97 | 180.00 | 1.66266 | 0.58 |
| 12 | 8  | 4 | o | 98976.08  | 95547.64  | 180.00 | 1.64400 | 0.99 |
| 11 | 9  | 5 | o | 10468.164 | 10268.700 | 0.00   | 1.63310 | 0.10 |
| 13 | 7  | 3 | o | 13562.112 | 13358.782 | 0.00   | 1.63310 | 0.13 |
| 14 | 4  | 4 | o | 89050.21  | 89245.09  | 0.00   | 1.62951 | 0.43 |
| 15 | 3  | 1 | o | 45019.31  | 43572.25  | 0.00   | 1.60506 | 0.42 |
| 10 | 8  | 8 | o | 26850.969 | 27183.619 | 0.00   | 1.62951 | 0.13 |
| 10 | 10 | 6 | o | 8034.338  | 7942.859  | 180.00 | 1.60165 | 0.04 |
| 14 | 6  | 2 | o | 151912.02 | 152295.94 | 0.00   | 1.60165 | 1.34 |
| 14 | 6  | 0 | o | 416.397   | 322.311   | 180.00 | 1.61540 | 0.00 |
| 15 | 3  | 3 | o | 45718.61  | 45402.02  | 180.00 | 1.57842 | 0.20 |
| 11 | 11 | 1 | o | 910337.8  | 905932.8  | 0.00   | 1.57842 | 3.95 |
| 16 | 0  | 0 | o | 942220.9  | 935349.6  | 0.00   | 1.53782 | 0.90 |
| 9  | 9  | 9 | o | 293009.53 | 292147.44 | 0.00   | 1.57842 | 0.42 |
| 13 | 7  | 5 | o | 25561.748 | 25486.494 | 0.00   | 1.57842 | 0.22 |
| 12 | 8  | 6 | o | 0.012     | 0.001     | 0.00   | 1.57518 | 0.00 |
| 11 | 11 | 3 | o | 9004.659  | 8752.307  | 0.00   | 1.55306 | 0.04 |
| 12 | 10 | 2 | o | 131.299   | 129.552   | 0.00   | 1.56242 | 0.00 |
| 14 | 6  | 4 | o | 70955.45  | 70143.86  | 0.00   | 1.56242 | 0.60 |
| 11 | 9  | 7 | o | 83095.61  | 80769.11  | 0.00   | 1.55306 | 0.66 |
| 15 | 5  | 1 | o | 14280.349 | 13884.371 | 0.00   | 1.55306 | 0.11 |
| 13 | 9  | 1 | o | 8654.576  | 8401.486  | 180.00 | 1.55306 | 0.07 |
| 16 | 2  | 2 | o | 350.275   | 351.780   | 180.00 | 1.51434 | 0.00 |
| 15 | 5  | 3 | o | 157815.36 | 160247.22 | 0.00   | 1.52889 | 1.19 |
| 12 | 10 | 4 | o | 4447.500  | 4471.191  | 180.00 | 1.52594 | 0.03 |
| 11 | 11 | 5 | o | 619318.6  | 620334.7  | 180.00 | 1.50581 | 2.17 |
| 10 | 10 | 8 | o | 256746.02 | 257567.66 | 0.00   | 1.51434 | 0.93 |
| 13 | 9  | 3 | o | 47729.34  | 48498.52  | 180.00 | 1.52889 | 0.37 |
| 14 | 8  | 2 | o | 7780.187  | 7814.076  | 180.00 | 1.51434 | 0.06 |

Supplementary Material (ESI) for Chemical Science  
This journal is (c) The Royal Society of Chemistry 2010

16 4 0 o 52559.63 52725.23 0.00 1.49190 0.18  
13 7 7 o 39740.13 39752.23 180.00 1.50581 0.14  
16 4 2 o 30085.428 30024.584 180.00 1.48105 0.19  
14 6 6 o 996.989 1008.485 0.00 1.50299 0.00  
13 9 5 o 28325.277 28369.521 180.00 1.48374 0.19  
12 10 6 o 218771.52 215843.19 180.00 1.47043 1.38  
12 8 8 o 538533.0 541966.4 0.00 1.49190 1.82  
15 5 5 o 133278.39 133589.58 180.00 1.48374 0.44  
17 1 1 o 80506.39 76334.28 180.00 1.44238 0.23  
14 8 4 o 2943.160 2940.289 0.00 1.48105 0.02  
15 7 1 o 23811.344 23903.305 180.00 1.48374 0.16  
11 11 7 o 3916.990 3700.720 180.00 1.44238 0.01  
15 7 3 o 46360.00 44932.20 0.00 1.46262 0.29  
16 4 4 o 11639.464 11397.981 180.00 1.44987 0.03  
11 9 9 o 57377.07 55630.11 0.00 1.46262 0.18  
12 12 2 o 2775.327 2644.463 0.00 1.43990 0.01  
12 12 0 o 1381437.3 1355706.9 0.00 1.44987 2.04  
17 3 1 o 25371.662 24667.090 180.00 1.42295 0.13  
13 11 1 o 58348.07 54904.75 0.00 1.44238 0.34  
13 11 3 o 10070.784 9802.386 0.00 1.42295 0.06  
16 6 2 o 12249.090 12030.151 0.00 1.43014 0.07  
12 12 4 o 631.926 516.460 0.00 1.41120 0.00  
14 8 6 o 284188.03 279245.75 180.00 1.43014 1.56  
13 9 7 o 939.011 918.558 180.00 1.42295 0.00  
17 3 3 o 30625.424 27345.822 180.00 1.40429 0.07  
15 7 5 o 4248.880 4154.523 0.00 1.42295 0.02  
14 10 2 o 16383.570 15677.204 180.00 1.42057 0.08  
10 10 10 o 6573.692 6275.688 180.00 1.42057 0.01  
14 10 0 o 14378.768 14173.026 180.00 1.43014 0.04  
12 10 8 o 368.657 323.867 180.00 1.40200 0.00  
16 6 4 o 424.115 372.123 180.00 1.40200 0.00  
13 11 5 o 8878.890 8803.234 180.00 1.38634 0.04  
14 10 4 o 26497.479 25667.041 0.00 1.39299 0.12  
15 9 1 o 13830.822 12393.058 180.00 1.40429 0.07  
12 12 6 o 14023.628 13700.698 0.00 1.36695 0.03  
15 9 3 o 8517.784 8490.918 180.00 1.38634 0.04  
17 5 1 o 8763.521 8717.235 180.00 1.38634 0.04  
18 2 0 o 716.131 700.984 180.00 1.35859 0.00  
11 11 9 o 9480.165 9267.192 0.00 1.36906 0.02  
17 5 3 o 2672.975 2617.138 180.00 1.36906 0.01  
18 2 2 o 39689.71 38388.45 180.00 1.35038 0.07  
16 8 0 o 5200.873 4541.380 180.00 1.37547 0.01  
15 7 7 o 24019.379 23606.262 180.00 1.36906 0.05  
16 8 2 o 70303.16 68902.61 0.00 1.36695 0.28  
14 10 6 o 935.251 905.972 0.00 1.35038 0.00  
14 8 8 o 0.110 0.099 0.00 1.36695 0.00  
16 6 6 o 1439649.0 1413547.4 0.00 1.35859 2.86  
15 9 5 o 62172.37 60075.70 180.00 1.35242 0.24  
13 9 9 o 110143.26 106428.59 180.00 1.35242 0.21  
13 13 1 o 95029.33 94084.16 0.00 1.33636 0.17  
13 11 7 o 1747.267 1731.158 0.00 1.33636 0.01  
17 5 5 o 718054.4 710891.4 0.00 1.33636 1.26  
16 8 4 o 109815.41 105717.32 180.00 1.34232 0.40  
18 4 2 o 30184.459 29777.080 0.00 1.32662 0.10  
13 13 3 o 111324.21 108327.73 0.00 1.32087 0.18  
14 12 2 o 208093.55 205122.30 0.00 1.32662 0.69

Supplementary Material (ESI) for Chemical Science  
This journal is (c) The Royal Society of Chemistry 2010

|    |    |    |   |           |           |        |         |      |
|----|----|----|---|-----------|-----------|--------|---------|------|
| 12 | 12 | 8  | o | 49298.20  | 51003.37  | 180.00 | 1.31146 | 0.07 |
| 17 | 7  | 1  | o | 1.686     | 1.466     | 180.00 | 1.33636 | 0.00 |
| 19 | 1  | 1  | o | 2058.335  | 2002.486  | 0.00   | 1.29143 | 0.00 |
| 12 | 10 | 10 | o | 145052.39 | 142771.67 | 0.00   | 1.32662 | 0.24 |
| 17 | 7  | 3  | o | 286.584   | 273.391   | 180.00 | 1.32087 | 0.00 |
| 14 | 12 | 4  | o | 3585.828  | 3617.998  | 0.00   | 1.30407 | 0.01 |
| 18 | 4  | 4  | o | 3922.595  | 3958.332  | 180.00 | 1.30407 | 0.01 |
| 15 | 11 | 1  | o | 2592.746  | 2478.697  | 0.00   | 1.32087 | 0.01 |
| 13 | 13 | 5  | o | 15500.298 | 15036.750 | 180.00 | 1.29143 | 0.02 |
| 15 | 11 | 3  | o | 211980.22 | 207610.33 | 0.00   | 1.30590 | 0.61 |
| 15 | 9  | 7  | o | 24518.449 | 23964.377 | 0.00   | 1.30590 | 0.07 |
| 16 | 8  | 6  | o | 34.643    | 34.968    | 180.00 | 1.30407 | 0.00 |
| 14 | 10 | 8  | o | 90952.17  | 87917.23  | 180.00 | 1.29680 | 0.25 |
| 18 | 6  | 0  | o | 100482.70 | 96997.16  | 180.00 | 1.29680 | 0.14 |
| 19 | 3  | 1  | o | 61900.33  | 64070.24  | 180.00 | 1.27743 | 0.15 |
| 18 | 6  | 2  | o | 1656.668  | 1655.497  | 180.00 | 1.28966 | 0.00 |
| 16 | 10 | 2  | o | 53561.90  | 51714.07  | 180.00 | 1.29680 | 0.14 |
| 11 | 11 | 11 | o | 1688750.0 | 1612611.6 | 0.00   | 1.29143 | 0.73 |
| 17 | 7  | 5  | o | 206030.22 | 196833.25 | 0.00   | 1.29143 | 0.54 |
| 15 | 11 | 5  | o | 6970.864  | 7186.145  | 180.00 | 1.27743 | 0.02 |
| 13 | 11 | 9  | o | 123587.78 | 127095.41 | 180.00 | 1.27743 | 0.29 |
| 19 | 3  | 3  | o | 48848.09  | 47530.59  | 0.00   | 1.26388 | 0.05 |
| 14 | 12 | 6  | o | 4628.953  | 4494.249  | 0.00   | 1.26891 | 0.01 |
| 16 | 10 | 4  | o | 6562.528  | 6978.902  | 0.00   | 1.27571 | 0.01 |
| 18 | 6  | 4  | o | 50572.52  | 48875.36  | 0.00   | 1.26891 | 0.11 |
| 20 | 0  | 0  | o | 46021.52  | 47387.86  | 180.00 | 1.23025 | 0.01 |
| 13 | 13 | 7  | o | 41908.46  | 43736.60  | 0.00   | 1.25075 | 0.04 |
| 17 | 9  | 1  | o | 26918.820 | 27506.887 | 180.00 | 1.27743 | 0.06 |
| 17 | 9  | 3  | o | 359693.1  | 347892.59 | 180.00 | 1.26388 | 0.73 |
| 19 | 5  | 1  | o | 14.802    | 15.683    | 180.00 | 1.25075 | 0.00 |
| 12 | 12 | 10 | o | 795.980   | 846.747   | 0.00   | 1.24913 | 0.00 |
| 17 | 7  | 7  | o | 14406.760 | 15181.440 | 180.00 | 1.25075 | 0.01 |
| 16 | 8  | 8  | o | 367561.6  | 355645.7  | 0.00   | 1.25562 | 0.35 |
| 19 | 5  | 3  | o | 373649.3  | 347047.41 | 180.00 | 1.23802 | 0.59 |
| 16 | 10 | 6  | o | 84554.37  | 81653.81  | 180.00 | 1.24274 | 0.14 |
| 14 | 14 | 2  | o | 422.586   | 414.567   | 180.00 | 1.23645 | 0.00 |
| 20 | 2  | 2  | o | 99230.95  | 90264.30  | 180.00 | 1.21813 | 0.06 |
| 15 | 9  | 9  | o | 12903.682 | 13609.981 | 0.00   | 1.25075 | 0.01 |
| 15 | 11 | 7  | o | 78413.91  | 72515.04  | 180.00 | 1.23802 | 0.12 |
| 17 | 9  | 5  | o | 896.689   | 822.056   | 0.00   | 1.23802 | 0.00 |
| 14 | 14 | 0  | o | 166839.80 | 160728.22 | 0.00   | 1.24274 | 0.07 |
| 18 | 8  | 2  | o | 59364.23  | 57194.95  | 180.00 | 1.24274 | 0.10 |
| 18 | 6  | 6  | o | 1955.482  | 1918.595  | 0.00   | 1.23645 | 0.00 |
| 15 | 13 | 1  | o | 155.503   | 140.874   | 0.00   | 1.23802 | 0.00 |
| 15 | 13 | 3  | o | 11467.690 | 11631.074 | 0.00   | 1.22567 | 0.02 |
| 14 | 12 | 8  | o | 20433.002 | 20869.826 | 180.00 | 1.22415 | 0.03 |
| 14 | 14 | 4  | o | 85667.96  | 77112.34  | 0.00   | 1.21813 | 0.05 |
| 14 | 10 | 10 | o | 19108.957 | 18750.479 | 180.00 | 1.23645 | 0.01 |
| 18 | 8  | 4  | o | 37322.05  | 38146.46  | 180.00 | 1.22415 | 0.05 |
| 16 | 12 | 2  | o | 254.585   | 260.741   | 180.00 | 1.22415 | 0.00 |
| 19 | 5  | 5  | o | 4388.782  | 4151.122  | 0.00   | 1.21368 | 0.00 |
| 20 | 4  | 0  | o | 14900.120 | 14794.469 | 180.00 | 1.20636 | 0.01 |
| 16 | 12 | 0  | o | 43109.25  | 44377.25  | 180.00 | 1.23025 | 0.03 |
| 13 | 13 | 9  | o | 21370.395 | 20440.678 | 0.00   | 1.20204 | 0.01 |
| 15 | 13 | 5  | o | 137584.89 | 131015.41 | 0.00   | 1.20204 | 0.14 |
| 16 | 12 | 4  | o | 35005.281 | 34589.785 | 180.00 | 1.20636 | 0.04 |

Supplementary Material (ESI) for Chemical Science  
This journal is (c) The Royal Society of Chemistry 2010

20 4 2 o 7276.947 7751.815 180.00 1.20061 0.01  
19 7 1 o 84325.25 79253.44 0.00 1.21368 0.10  
13 11 11 o 126941.79 118805.48 180.00 1.21368 0.08  
14 14 6 o 782334.7 789188.6 0.00 1.18933 0.31  
17 11 1 o 59474.24 55443.50 180.00 1.21368 0.07  
21 1 1 o 63171.39 74866.02 0.00 1.16902 0.02  
19 7 3 o 120994.18 112831.45 180.00 1.20204 0.12  
17 11 3 o 1619.663 1499.889 180.00 1.20204 0.00  
16 10 8 o 22083.920 23429.754 0.00 1.20061 0.02  
17 9 7 o 55683.30 51520.11 0.00 1.20204 0.06  
18 8 6 o 1767.201 2964.486 0.00 1.19493 0.00  
20 4 4 o 139421.97 124103.91 180.00 1.18381 0.05  
15 11 9 o 11291.755 11339.039 0.00 1.19072 0.01  
18 10 2 o 1364.882 1334.822 0.00 1.18933 0.00  
12 12 12 o 599684.4 522860.5 180.00 1.18381 0.07  
16 12 6 o 35417.16 34727.598 180.00 1.17837 0.02  
18 10 0 o 3781.583 6242.375 0.00 1.19493 0.00  
19 7 5 o 608.710 521.090 0.00 1.17972 0.00  
17 11 5 o 436307.2 378504.9 180.00 1.17972 0.30  
21 3 1 o 1860.427 23047.855 180.00 1.15861 0.00  
15 13 7 o 1123.906 1207.500 0.00 1.16902 0.00  
20 6 2 o 230544.48 207437.55 180.00 1.17300 0.14  
14 12 10 o 54952.24 49263.57 0.00 1.17300 0.03  
18 10 4 o 4287.638 3795.650 180.00 1.17300 0.00  
21 3 3 o 64824.33 54525.20 0.00 1.14847 0.01  
14 14 8 o 12669.525 13597.711 180.00 1.15224 0.00  
19 9 1 o 346057.38 339613.56 0.00 1.16902 0.19  
15 15 1 o 1558.905 11032.013 180.00 1.15861 0.00  
15 15 3 o 22761.734 18660.736 0.00 1.14847 0.00  
20 6 4 o 296.608 3632.676 0.00 1.15733 0.00  
19 9 3 o -0.896 0.880 0.00 1.15861 0.00  
13 13 11 o 1555.791 1269.763 180.00 1.14847 0.00  
16 14 2 o 117352.93 115077.06 0.00 1.15224 0.04  
17 9 9 o 2282.937 12034.660 180.00 1.15861 0.00  
18 8 8 o 383.847 2931.899 0.00 1.15733 0.00  
17 11 7 o 23668.818 18513.270 0.00 1.14847 0.01  
19 7 7 o 3936.891 3025.729 0.00 1.14847 0.00  
16 10 10 o 6967.676 6306.784 180.00 1.15224 0.00  
15 15 5 o 82.558 12714.532 0.00 1.12896 0.00  
21 5 1 o 50418.59 44463.59 180.00 1.13859 0.01  
18 10 6 o 23854.025 21393.313 180.00 1.14722 0.01  
16 12 8 o 1620.064 1014.693 0.00 1.14226 0.00  
16 14 4 o 13211.588 20768.498 180.00 1.13737 0.00  
17 13 1 o 23515.664 17713.188 0.00 1.14847 0.01  
17 13 3 o 42861.59 36016.57 0.00 1.13859 0.01  
19 9 5 o 5099.930 4133.288 0.00 1.13859 0.00  
20 8 0 o 1859593.4 1129215.8 0.00 1.14226 0.24  
21 5 3 o 17.950 360.477 0.00 1.12896 0.00  
15 13 9 o -948.817 16056.077 0.00 1.12896 0.00  
20 8 2 o 2883.435 4309.497 0.00 1.13737 0.00  
22 2 0 o 434523.2 141421.67 0.00 1.11382 0.01  
20 6 6 o -536.965 6217.801 0.00 1.13254 0.00  
15 11 11 o 2011.163 1585.428 180.00 1.13859 0.00  
18 12 2 o 8.468 296.419 0.00 1.13254 0.00  
22 2 2 o 34644.832 24866.334 0.00 1.10928 0.00  
17 13 5 o 1557.649 2632.559 180.00 1.11957 0.00

Supplementary Material (ESI) for Chemical Science  
This journal is (c) The Royal Society of Chemistry 2010

20 8 4 o 14250.973 33379.434 0.00 1.12306 0.00  
16 14 6 o 35450.93 10634.270 180.00 1.11382 0.00  
18 12 4 o 555.960 2020.203 0.00 1.11841 0.00  
14 14 10 o 19912.291 14865.208 0.00 1.10928 0.00  
15 15 7 o 730592.7 67270.84 180.00 1.10147 0.01  
21 5 5 o 114274.41 43960.29 180.00 1.11041 0.00  
14 12 12 o 4009.179 16451.443 180.00 1.11841 0.00  
19 11 1 o 6444.791 9349.010 180.00 1.11957 0.00  
21 7 1 o 2906.118 1038.661 0.00 1.11041 0.00  
18 10 8 o 5943.831 1670.468 180.00 1.11382 0.00  
22 4 2 o 3206216.3 101458.89 0.00 1.09600 0.01  
19 11 3 o 4801.356 1432.664 180.00 1.11041 0.00  
19 9 7 o 117051.32 41302.91 180.00 1.11041 0.01  
17 11 9 o 39430.66 13971.546 180.00 1.11041 0.00  
21 7 3 o 73143.36 6798.811 0.00 1.10147 0.00  
20 8 6 o 213965.78 16943.299 180.00 1.10037 0.00  
16 12 10 o 71367.54 5842.029 180.00 1.10037 0.00  
17 13 7 o 278.888 8.049 180.00 1.09275 0.00  
22 4 4 o -1582.033 21905.373 0.00 1.08318 0.00  
18 12 6 o 2401410.3 66901.76 0.00 1.09600 0.01  
23 1 1 o 219562.56 212229.44 0.00 1.06777 0.01  
13 13 13 o 1220744.5 134442.63 180.00 1.09275 0.00  
19 11 5 o 71320.48 7750.123 0.00 1.09275 0.00  
20 10 2 o 3386263.5 85981.78 180.00 1.09600 0.02  
16 16 2 o -123.950 1452.357 180.00 1.08318 0.00  
16 14 8 o -434.086 16895.537 0.00 1.08318 0.00  
15 13 11 o -1441.774 20239.908 180.00 1.08423 0.00  
21 7 5 o -154.170 3135.082 0.00 1.08423 0.00  
15 15 9 o 35851.96 27066.129 0.00 1.06777 0.00  
17 15 1 o -51.123 458.746 180.00 1.08423 0.00  
16 16 0 o -6637.277 73635.21 180.00 1.08740 0.00  
16 16 4 o -8402.842 97267.59 0.00 1.07080 0.00  
20 10 4 o -112.444 1723.068 0.00 1.08318 0.00  
22 6 0 o 1842750.3 290951.59 180.00 1.07900 0.01  
17 15 3 o 297728.34 91277.89 180.00 1.07591 0.01  
22 6 2 o -22.760 549.880 0.00 1.07488 0.00  
23 3 1 o 49902.48 42709.21 0.00 1.05982 0.01  
18 14 2 o -21.619 9.823 0.00 1.07488 0.00  
21 9 1 o 64773.91 16110.661 180.00 1.07591 0.00  
19 9 9 o 8129.820 2013.940 180.00 1.07591 0.00  
18 14 0 o 318770.63 40900.08 180.00 1.07900 0.00  
17 15 5 o 130678.01 106618.99 0.00 1.05982 0.01  
18 12 8 o 7435.911 9180.756 0.00 1.06677 0.00  
14 14 12 o 247970.80 121117.32 180.00 1.06278 0.01  
22 6 4 o 135969.59 66556.41 180.00 1.06278 0.01  
23 3 3 o 396675.5 257159.20 0.00 1.05204 0.03  
18 10 10 o -191.058 1834.407 180.00 1.07488 0.00  
19 11 7 o 18426.975 10069.465 0.00 1.06777 0.00  
21 9 3 o 93892.71 50914.70 180.00 1.06777 0.01  
20 8 8 o -437.426 5005.379 180.00 1.07080 0.00  
16 16 6 o 47435.23 35051.488 0.00 1.05108 0.00  
18 14 4 o 197642.88 94795.55 180.00 1.06278 0.02  
17 13 9 o 181810.80 148009.22 0.00 1.05982 0.02  
20 10 6 o 46930.58 21729.619 180.00 1.06278 0.00  
17 11 11 o 1789.041 997.297 180.00 1.06777 0.00  
19 13 1 o 130510.66 64075.57 180.00 1.06777 0.01

Supplementary Material (ESI) for Chemical Science  
This journal is (c) The Royal Society of Chemistry 2010

```
19 13 3 o 6795.745 5321.949 0.00 1.05982 0.00
21 7 7 o 7514.474 5993.589 180.00 1.05982 0.00
16 14 10 o 4549.924 4585.568 0.00 1.04726 0.00
21 9 5 o 13732.551 7640.153 180.00 1.05204 0.00
16 12 12 o 17867.943 40250.26 0.00 1.05493 0.00
20 12 2 o 2916.319 2001.818 0.00 1.05108 0.00
22 8 2 o 13660.693 13884.042 180.00 1.04726 0.00
20 12 0 o 490.310 1155.964 180.00 1.05493 0.00
_reflns_number_total          369
_reflns_limit_h_min           1
_reflns_limit_h_max           23
_reflns_limit_k_min           0
_reflns_limit_k_max           16
_reflns_limit_l_min           0
_reflns_limit_l_max           13
_reflns_d_resolution_high      1.047
_reflns_d_resolution_low      14.206
#--eof--eof--eof--eof--eof--eof--eof--eof--eof--eof--eof--eof--eof--#
```

(b)

data\_DESHREV2\_publ

```
_pd_block_id
2010-08-06T11:07|DESHREV2|ceak|stadip

_audit_creation_method "from EXP file using GSAS2CIF"
_audit_creation_date    2010-08-06T11:07
_audit_author_name     ceak
_audit_update_record
;2010-08-06T11:07 Initial CIF as created by GSAS2CIF
;
```

```
_refine_ls_shift/su_max      0.59
_refine_ls_shift/su_mean     0.02
_computing_structure_refinement GSAS
_refine_ls_number_parameters  41
_refine_ls_goodness_of_fit_all 1.01
_refine_ls_number_restraints  0
_refine_ls_matrix_type       full
```

```
_pd_phase_name
"Ru1% NaY desobed NOx with H2"
_cell_length_a              24.73623(9)
_cell_length_b              24.73623
_cell_length_c              24.73623
_cell_angle_alpha           90.0
_cell_angle_beta            90.0
_cell_angle_gamma           90.0
_cell_volume                 15135.63(17)
_symmetry_cell_setting      cubic
_symmetry_space_group_name_H-M "F d -3 m"
```

```
loop_
  _atom_site_type_symbol
  _atom_site_label
  _atom_site_fract_x
```

**Supplementary Material (ESI) for Chemical Science**  
**This journal is (c) The Royal Society of Chemistry 2010**

```

_atom_site_fract_y
_atom_site_fract_z
_atom_site_occupancy
_atom_site_thermal_displace_type
_atom_site_U_iso_or_equiv
_atom_site_symmetry_multiplicity
O
O1  0.8963(4)  0.1037(4)  0.0    1.0    Uiso  0.029(7)  96
O
O2  0.9667(6)  0.07587(35)  0.07587(35)  1.0    Uiso  0.023(5)  96
O
O3  0.9962(5)  0.1396(7)  0.9962(5)  1.0    Uiso  0.081(7)  96
O
O4  0.9318(5)  0.1784(4)  0.0716(4)  1.0    Uiso  0.013(6)  96
Si
T1  0.94820(22)  0.12442(24)  0.03579(22)  1.0    Uiso  0.0278(14)  192
O
ow1  0.4483(10)  0.4483(10)  0.5434(15)  0.127(7)  Uiso  0.077(28)  96
Na
SII  0.23290(15)  0.23290(15)  0.23290(15)  0.861(14)  Uiso  0.082(6)  32
Na
SI'  0.06752(24)  0.06752(24)  0.06752(24)  0.483(13)  Uiso  0.055(7)  32
Na
siii 0.375    0.375    0.6210(27)  0.115(13)  Uiso  0.072(7)  48
Na
sV   0.5      0.5      0.5      0.159(10)  Uiso  0.019(4)  16
Ru
ru   0.125    0.125    0.125    0.142(8)  Uiso  0.0834(3)  8
O
ow2  0.3133(5)  0.3133(5)  0.2068(7)  0.638(13)  Uiso  0.117(12)  96
O
ow3  0.2801(11)  0.2801(11)  0.2801(11)  0.219(24)  Uiso  0.11(4)  32

_chemical_formula_sum      "Na0.27 O2.37 Ru0.01 Si"
_chemical_formula_weight   72.84
_cell_formula_units_Z     192

loop__atom_type_symbol
_atom_type_number_in_cell
_atom_type_scatter_dispersion_real
_atom_type_scatter_dispersion_imag
_atom_type_scatter_Cromer_Mann_a1
_atom_type_scatter_Cromer_Mann_a2
_atom_type_scatter_Cromer_Mann_a3
_atom_type_scatter_Cromer_Mann_a4
_atom_type_scatter_Cromer_Mann_b1
_atom_type_scatter_Cromer_Mann_b2
_atom_type_scatter_Cromer_Mann_b3
_atom_type_scatter_Cromer_Mann_b4
_atom_type_scatter_Cromer_Mann_c
_atom_type_scatter_source
O    454.203  0.000  0.000
3.04850 13.2771 2.28680 5.70110 1.54630 0.32390 0.86700 32.9089 0.25080
International_Tables_Vol_C
Si   192.0  0.000  0.000

```

Supplementary Material (ESI) for Chemical Science  
This journal is (c) The Royal Society of Chemistry 2010

6.29150 2.43860 3.03530 32.3337 1.98910 0.67850 1.54100 81.6937 1.14070  
International\_Tables\_Vol\_C  
Na 52.657 0.000 0.000  
4.76260 3.28500 3.17360 8.84220 1.26740 0.31360 1.11280 129.424 0.67600  
International\_Tables\_Vol\_C  
Ru 1.137 0.000 0.000  
19.2674 0.80852 12.9182 8.43467 4.86337 24.7997 1.56756 94.2928 5.37874  
International\_Tables\_Vol\_C  
\_diffn\_radiation\_probe x-ray  
\_diffn\_radiation\_polarisn\_ratio 0.0  
\_diffn\_radiation\_wavelength 1.540562  
\_diffn\_radiation\_type Cu\_K\alpha~1~  
\_pd\_proc\_ls\_prof\_R\_factor 0.0318  
\_pd\_proc\_ls\_prof\_wR\_factor 0.0431  
\_pd\_proc\_ls\_prof\_wR\_expected 0.0430  
\_refine\_ls\_R\_Fsqd\_factor 0.10536  
  
\_pd\_proc\_ls\_background\_function  
; GSAS Background function number 1 with 18 terms.  
Shifted Chebyshev function of 1st kind  
1: 294.374 2: -201.102 3: 60.4383 4: -11.2548  
5: -12.1908 6: -15.5667 7: 38.3328 8: -23.6268  
9: 1.30625 10: 5.76620 11: -15.6537 12: 2.51078  
13: 2.17043 14: -13.5866 15: 4.08970 16: 3.01348  
17: -1.50847 18: -1.53944  
;  
  
\_pd\_spec\_mounting  
;sealed glass capillary .7mm outer diameter packing density 40%  
;  
\_pd\_spec\_mount\_mode 'transmission'  
\_pd\_spec\_shape 'cylinder'  
\_exptl\_absorpt\_process\_details  
; GSAS Absorption/surface roughness correction: function number 0  
Debye-Scherrer absorption correction  
Term (= MU.r/wave) = 1.7234  
Correction is not refined.  
;  
\_exptl\_absorpt\_correction\_T\_min 0.02124  
\_exptl\_absorpt\_correction\_T\_max 0.07490  
  
\_pd\_proc\_ls\_profile\_function  
;  
CW Profile function number 3 with 19 terms  
Pseudovoigt profile coefficients as parameterized in  
P. Thompson, D.E. Cox & J.B. Hastings (1987). J. Appl. Cryst.,20,79-83.  
Asymmetry correction of L.W. Finger, D.E. Cox & A. P. Jephcoat (1994).  
J. Appl. Cryst.,27,892-900.  
#1(GU) = 0.000 #2(GV) = 6.338 #3(GW) = 4.936  
#4(GP) = 3.355 #5(LX) = 2.602 #6(LY) = 3.376  
#7(S/L) = 0.0249 #8(H/L) = 0.0269  
#9(trns) = 0.00 #10(shft)= 0.0000  
#11(stec)= 0.00 #12(ptec)= 0.00 #13(sfec)= 0.00  
#14(L11) = 0.036 #15(L22) = 0.032 #16(L33) = -0.045  
#17(L12) = -0.017 #18(L13) = 0.010 #19(L23) = 0.015  
Peak tails are ignored where the intensity is below 0.0005 times the peak



Supplementary Material (ESI) for Chemical Science  
This journal is (c) The Royal Society of Chemistry 2010

```
Aniso. broadening axis  0.0  0.0  1.0
;
_pd_proc_ls_peak_cutoff 0.00050
_pd_proc_info_datetime  2010-08-06T11:07:20
_pd_calc_method         "Rietveld Refinement"

_pd_meas_2theta_range_min  3.01
_pd_meas_2theta_range_max  95.0
_pd_meas_2theta_range_inc  0.01
_pd_proc_2theta_range_min  2.99985
_pd_proc_2theta_range_max  94.98985
_pd_proc_2theta_range_inc  0.01

loop_
  _refln_index_h
  _refln_index_k
  _refln_index_l
  _refln_observed_status
  _refln_F_squared_meas
  _refln_F_squared_calc
  _refln_phase_calc
  _refln_d_spacing
  _gsas_i100_meas
1 1 1 o 2497974.3 2496519.5 180.00 14.28147 100.00
2 2 0 o 274097.47 271738.34 0.00 8.74558 6.24
3 1 1 o 166889.67 166418.28 0.00 7.45825 5.57
2 2 2 o 92352.23 89812.51 180.00 7.14074 0.93
4 0 0 o 5592.597 3753.370 0.00 6.18406 0.03
3 3 1 o 458189.0 455704.6 180.00 5.67488 8.97
4 2 2 o 7222.535 4206.879 180.00 5.04926 0.11
5 1 1 o 186469.08 186936.39 0.00 4.76049 2.60
3 3 3 o 1386.526 1388.429 0.00 4.76049 0.01
4 4 0 o 464355.5 459447.8 180.00 4.37279 2.73
5 3 1 o 760.004 257.172 180.00 4.18119 0.02
4 4 2 o 36147.39 34495.734 180.00 4.12271 0.37
6 2 0 o 68739.50 66586.31 0.00 3.91114 0.66
5 3 3 o 783752.0 778260.4 180.00 3.77224 6.92
6 2 2 o 38632.80 38220.75 180.00 3.72913 0.33
4 4 4 o 28745.502 27856.016 180.00 3.57037 0.08
7 1 1 o 12029.757 11685.793 180.00 3.46377 0.09
5 5 1 o 60031.78 58440.78 0.00 3.46377 0.45
6 4 2 o 396942.2 394657.3 180.00 3.30552 5.40
5 5 3 o 18664.697 15971.466 180.00 3.22038 0.12
7 3 1 o 577.487 487.131 0.00 3.22038 0.01
8 0 0 o 28537.539 28586.979 180.00 3.09203 0.04
7 3 3 o 102016.17 98872.61 180.00 3.02201 0.59
6 4 4 o 16855.811 18067.436 0.00 2.99971 0.09
8 2 2 o 60495.51 58791.73 0.00 2.91519 0.33
6 6 0 o 543139.7 531366.3 0.00 2.91519 1.45
7 5 1 o 14976.570 14735.022 0.00 2.85629 0.16
6 6 2 o 49600.14 48216.73 180.00 2.83744 0.24
5 5 5 o 1929517.9 1904171.6 180.00 2.85629 3.28
9 1 1 o 21009.258 21107.697 180.00 2.71515 0.09
8 4 0 o 271707.94 270213.66 0.00 2.76559 1.31
7 5 3 o 102363.07 103397.44 0.00 2.71515 0.94
```

Supplementary Material (ESI) for Chemical Science  
This journal is (c) The Royal Society of Chemistry 2010

|    |   |   |   |           |           |        |         |      |
|----|---|---|---|-----------|-----------|--------|---------|------|
| 8  | 4 | 2 | o | 46575.39  | 45829.46  | 0.00   | 2.69894 | 0.41 |
| 6  | 6 | 4 | o | 422732.8  | 422591.9  | 180.00 | 2.63689 | 1.85 |
| 9  | 3 | 1 | o | 190077.64 | 190803.69 | 0.00   | 2.59306 | 1.59 |
| 8  | 4 | 4 | o | 210213.06 | 208566.02 | 0.00   | 2.52463 | 0.84 |
| 9  | 3 | 3 | o | 4584.304  | 4359.965  | 0.00   | 2.48608 | 0.02 |
| 7  | 7 | 1 | o | 21703.912 | 20702.326 | 180.00 | 2.48608 | 0.08 |
| 7  | 5 | 5 | o | 31468.625 | 29962.592 | 180.00 | 2.48608 | 0.13 |
| 10 | 2 | 0 | o | 1249.337  | 1159.148  | 0.00   | 2.42559 | 0.00 |
| 8  | 6 | 2 | o | 14457.450 | 13193.655 | 0.00   | 2.42559 | 0.11 |
| 10 | 2 | 2 | o | 1025.360  | 993.475   | 0.00   | 2.38024 | 0.00 |
| 9  | 5 | 1 | o | 1136.676  | 1101.876  | 0.00   | 2.39134 | 0.01 |
| 7  | 7 | 3 | o | 30416.080 | 29498.355 | 0.00   | 2.39134 | 0.11 |
| 6  | 6 | 6 | o | 877145.1  | 853233.8  | 0.00   | 2.38024 | 0.98 |
| 9  | 5 | 3 | o | 46.975    | 36.001    | 180.00 | 2.30667 | 0.00 |
| 8  | 6 | 4 | o | 13137.244 | 11972.955 | 180.00 | 2.29670 | 0.08 |
| 10 | 4 | 2 | o | 590.917   | 740.996   | 180.00 | 2.25810 | 0.00 |
| 11 | 1 | 1 | o | 51536.42  | 53226.30  | 180.00 | 2.23039 | 0.16 |
| 7  | 7 | 5 | o | 158354.94 | 162491.31 | 0.00   | 2.23039 | 0.47 |
| 8  | 8 | 0 | o | 444941.0  | 437435.6  | 0.00   | 2.18639 | 0.60 |
| 11 | 3 | 1 | o | 46623.26  | 45968.13  | 180.00 | 2.16121 | 0.26 |
| 10 | 4 | 4 | o | 28310.174 | 26962.561 | 0.00   | 2.15301 | 0.08 |
| 9  | 7 | 1 | o | 15322.054 | 15126.481 | 0.00   | 2.16121 | 0.08 |
| 9  | 5 | 5 | o | 27602.797 | 27239.025 | 180.00 | 2.16121 | 0.08 |
| 8  | 8 | 2 | o | 455.749   | 432.513   | 0.00   | 2.15301 | 0.00 |
| 10 | 6 | 0 | o | 28734.609 | 29168.361 | 0.00   | 2.12111 | 0.08 |
| 8  | 6 | 6 | o | 31777.275 | 32130.650 | 0.00   | 2.12111 | 0.08 |
| 11 | 3 | 3 | o | 187250.22 | 186379.23 | 0.00   | 2.09810 | 0.45 |
| 9  | 7 | 3 | o | 72784.91  | 72475.01  | 180.00 | 2.09810 | 0.37 |
| 12 | 0 | 0 | o | 298018.16 | 284942.69 | 180.00 | 2.06135 | 0.19 |
| 10 | 6 | 2 | o | 56717.58  | 56105.46  | 180.00 | 2.09059 | 0.28 |
| 8  | 8 | 4 | o | 126940.80 | 122430.97 | 180.00 | 2.06135 | 0.31 |
| 11 | 5 | 1 | o | 10992.308 | 10748.995 | 0.00   | 2.04021 | 0.06 |
| 12 | 2 | 2 | o | 6109.491  | 5347.641  | 180.00 | 2.00637 | 0.02 |
| 7  | 7 | 7 | o | 65725.20  | 64949.36  | 0.00   | 2.04021 | 0.05 |
| 10 | 6 | 4 | o | 382.020   | 342.315   | 180.00 | 2.00637 | 0.00 |
| 11 | 5 | 3 | o | 4885.815  | 5890.600  | 0.00   | 1.98686 | 0.02 |
| 9  | 7 | 5 | o | 3240.629  | 3940.842  | 180.00 | 1.98686 | 0.02 |
| 12 | 4 | 0 | o | 9062.313  | 10439.397 | 180.00 | 1.95557 | 0.02 |
| 12 | 4 | 2 | o | 139177.47 | 139608.73 | 0.00   | 1.93157 | 0.56 |
| 9  | 9 | 1 | o | 59676.39  | 58782.96  | 180.00 | 1.93749 | 0.12 |
| 13 | 1 | 1 | o | 7.085     | 8.174     | 180.00 | 1.89163 | 0.00 |
| 8  | 8 | 6 | o | 67357.27  | 67366.44  | 0.00   | 1.93157 | 0.13 |
| 10 | 8 | 2 | o | 73219.58  | 76334.28  | 0.00   | 1.90844 | 0.29 |
| 11 | 5 | 5 | o | 2590.930  | 2733.239  | 180.00 | 1.89163 | 0.00 |
| 11 | 7 | 1 | o | 8043.176  | 8589.621  | 180.00 | 1.89163 | 0.03 |
| 9  | 9 | 3 | o | 51163.47  | 54587.44  | 0.00   | 1.89163 | 0.10 |
| 10 | 6 | 6 | o | 5315.026  | 5044.011  | 180.00 | 1.88612 | 0.01 |
| 12 | 4 | 4 | o | 1137.648  | 1741.977  | 0.00   | 1.86456 | 0.00 |
| 13 | 3 | 1 | o | 18001.412 | 18340.420 | 180.00 | 1.84887 | 0.07 |
| 11 | 7 | 3 | o | 41885.69  | 42475.87  | 0.00   | 1.84887 | 0.15 |
| 10 | 8 | 4 | o | 101.885   | 102.559   | 180.00 | 1.84373 | 0.00 |
| 9  | 7 | 7 | o | 69242.84  | 69900.23  | 0.00   | 1.84887 | 0.12 |
| 12 | 6 | 2 | o | 46627.81  | 50483.76  | 180.00 | 1.82358 | 0.16 |
| 13 | 3 | 3 | o | 87162.23  | 89240.79  | 0.00   | 1.80889 | 0.15 |
| 9  | 9 | 5 | o | 161140.89 | 164524.81 | 0.00   | 1.80889 | 0.27 |
| 13 | 5 | 1 | o | 39520.43  | 40838.82  | 180.00 | 1.77140 | 0.13 |

Supplementary Material (ESI) for Chemical Science  
This journal is (c) The Royal Society of Chemistry 2010

|    |    |   |   |           |           |        |         |      |
|----|----|---|---|-----------|-----------|--------|---------|------|
| 12 | 6  | 4 | o | 8079.923  | 8494.992  | 180.00 | 1.76687 | 0.02 |
| 14 | 2  | 0 | o | 77951.76  | 79136.86  | 180.00 | 1.74912 | 0.12 |
| 8  | 8  | 8 | o | 199385.17 | 194779.16 | 0.00   | 1.78518 | 0.11 |
| 11 | 7  | 5 | o | 95472.45  | 98617.01  | 180.00 | 1.77140 | 0.30 |
| 14 | 2  | 2 | o | 2417.637  | 2275.566  | 180.00 | 1.73188 | 0.00 |
| 10 | 8  | 6 | o | 9293.488  | 9432.561  | 0.00   | 1.74912 | 0.03 |
| 13 | 5  | 3 | o | 38944.14  | 38205.43  | 180.00 | 1.73614 | 0.11 |
| 10 | 10 | 0 | o | 767969.7  | 779610.8  | 180.00 | 1.74912 | 0.57 |
| 11 | 9  | 1 | o | 14339.095 | 14095.006 | 180.00 | 1.73614 | 0.04 |
| 10 | 10 | 2 | o | 1146.771  | 1073.345  | 0.00   | 1.73188 | 0.00 |
| 12 | 8  | 0 | o | 5733.256  | 5437.688  | 0.00   | 1.71515 | 0.01 |
| 12 | 8  | 2 | o | 19070.744 | 19093.926 | 180.00 | 1.69889 | 0.05 |
| 14 | 4  | 2 | o | 19461.422 | 19206.045 | 180.00 | 1.68309 | 0.05 |
| 11 | 9  | 3 | o | 327846.22 | 329206.38 | 180.00 | 1.70291 | 0.89 |
| 9  | 9  | 7 | o | 37079.91  | 37243.19  | 0.00   | 1.70291 | 0.05 |
| 12 | 6  | 6 | o | 38543.97  | 38087.66  | 180.00 | 1.68309 | 0.05 |
| 10 | 10 | 4 | o | 43077.77  | 42600.01  | 180.00 | 1.68309 | 0.06 |
| 13 | 5  | 5 | o | 170.771   | 145.503   | 180.00 | 1.67152 | 0.00 |
| 13 | 7  | 1 | o | 2191.285  | 1867.343  | 180.00 | 1.67152 | 0.01 |
| 15 | 1  | 1 | o | 2255.957  | 1865.749  | 180.00 | 1.64180 | 0.00 |
| 11 | 7  | 7 | o | 28060.639 | 23580.611 | 180.00 | 1.67152 | 0.04 |
| 12 | 8  | 4 | o | 113403.23 | 120729.89 | 180.00 | 1.65276 | 0.28 |
| 14 | 4  | 4 | o | 16513.971 | 13741.272 | 180.00 | 1.63820 | 0.02 |
| 13 | 7  | 3 | o | 5330.226  | 4334.867  | 0.00   | 1.64180 | 0.01 |
| 11 | 9  | 5 | o | 6.913     | 5.720     | 0.00   | 1.64180 | 0.00 |
| 10 | 8  | 8 | o | 3986.096  | 3257.941  | 0.00   | 1.63820 | 0.00 |
| 15 | 3  | 1 | o | 2693.746  | 2783.866  | 0.00   | 1.61361 | 0.01 |
| 14 | 6  | 0 | o | 6162.771  | 6563.440  | 180.00 | 1.62401 | 0.01 |
| 10 | 10 | 6 | o | 11100.396 | 11792.243 | 180.00 | 1.61019 | 0.01 |
| 14 | 6  | 2 | o | 50230.89  | 53410.14  | 0.00   | 1.61019 | 0.11 |
| 15 | 3  | 3 | o | 57164.05  | 56660.62  | 180.00 | 1.58683 | 0.06 |
| 13 | 7  | 5 | o | 4616.004  | 4556.317  | 0.00   | 1.58683 | 0.01 |
| 12 | 8  | 6 | o | 13260.555 | 13379.494 | 0.00   | 1.58357 | 0.03 |
| 14 | 6  | 4 | o | 49064.09  | 53908.86  | 0.00   | 1.57075 | 0.10 |
| 16 | 0  | 0 | o | 446089.8  | 484450.0  | 0.00   | 1.54601 | 0.10 |
| 11 | 11 | 1 | o | 597503.6  | 588512.8  | 0.00   | 1.58683 | 0.62 |
| 15 | 5  | 1 | o | 101.817   | 103.911   | 0.00   | 1.56134 | 0.00 |
| 12 | 10 | 2 | o | 318.746   | 348.886   | 0.00   | 1.57075 | 0.00 |
| 9  | 9  | 9 | o | 12759.521 | 12546.324 | 180.00 | 1.58683 | 0.00 |
| 13 | 9  | 1 | o | 47467.36  | 48123.98  | 180.00 | 1.56134 | 0.09 |
| 11 | 11 | 3 | o | 1109.167  | 1124.881  | 0.00   | 1.56134 | 0.00 |
| 11 | 9  | 7 | o | 46200.81  | 46759.52  | 0.00   | 1.56134 | 0.09 |
| 15 | 5  | 3 | o | 73200.65  | 84082.66  | 0.00   | 1.53703 | 0.13 |
| 16 | 2  | 2 | o | 637.450   | 694.903   | 180.00 | 1.52241 | 0.00 |
| 13 | 9  | 3 | o | 17391.340 | 20007.049 | 180.00 | 1.53703 | 0.03 |
| 12 | 10 | 4 | o | 1586.358  | 1942.627  | 0.00   | 1.53408 | 0.00 |
| 14 | 8  | 2 | o | 55089.42  | 58348.42  | 180.00 | 1.52241 | 0.09 |
| 14 | 6  | 6 | o | 7322.623  | 8545.669  | 180.00 | 1.51101 | 0.01 |
| 13 | 7  | 7 | o | 11754.853 | 12128.087 | 180.00 | 1.51383 | 0.01 |
| 11 | 11 | 5 | o | 267109.22 | 275671.97 | 180.00 | 1.51383 | 0.22 |
| 10 | 10 | 8 | o | 33879.129 | 35743.13  | 0.00   | 1.52241 | 0.03 |
| 16 | 4  | 0 | o | 19688.123 | 20705.162 | 0.00   | 1.49985 | 0.02 |
| 16 | 4  | 2 | o | 10398.124 | 10611.491 | 180.00 | 1.48895 | 0.02 |
| 13 | 9  | 5 | o | 2011.140  | 1787.482  | 180.00 | 1.49165 | 0.00 |
| 15 | 5  | 5 | o | 27367.867 | 24928.424 | 180.00 | 1.49165 | 0.02 |
| 15 | 7  | 1 | o | 66142.64  | 59831.37  | 180.00 | 1.49165 | 0.10 |

Supplementary Material (ESI) for Chemical Science  
This journal is (c) The Royal Society of Chemistry 2010

12 8 8 o 244944.81 255673.48 0.00 1.49985 0.20  
14 8 4 o 399.295 406.441 0.00 1.48895 0.00  
15 7 3 o 2357.570 2654.433 0.00 1.47042 0.00  
12 10 6 o 100810.94 100037.52 180.00 1.47827 0.15  
17 1 1 o 129267.29 133420.25 180.00 1.45006 0.09  
16 4 4 o 10509.092 10809.168 0.00 1.45760 0.01  
11 9 9 o 72115.75 78516.10 0.00 1.47042 0.05  
12 12 0 o 1212793.3 1231148.1 0.00 1.45760 0.42  
16 6 2 o 3609.920 3754.522 0.00 1.43776 0.00  
13 11 1 o 71873.05 72330.07 0.00 1.45006 0.10  
11 11 7 o 803.021 808.733 0.00 1.45006 0.00  
17 3 1 o 72.723 95.605 0.00 1.43053 0.00  
12 12 2 o 761.750 843.568 0.00 1.44758 0.00  
14 8 6 o 177853.05 182813.81 180.00 1.43776 0.23  
13 9 7 o 13756.104 18474.963 180.00 1.43053 0.02  
15 7 5 o 4864.334 6617.506 180.00 1.43053 0.01  
13 11 3 o 5370.638 7380.779 0.00 1.43053 0.01  
17 3 3 o 3906.896 8736.073 180.00 1.41177 0.00  
14 10 0 o 44490.50 45066.05 180.00 1.43776 0.03  
14 10 2 o 74.388 137.811 0.00 1.42815 0.00  
12 12 4 o -136.356 4425.332 180.00 1.41872 0.00  
16 6 4 o 2287.953 8921.359 180.00 1.40948 0.00  
10 10 10 o 26039.877 45407.86 0.00 1.42815 0.01  
15 9 1 o 19202.990 45140.50 180.00 1.41177 0.02  
17 5 1 o 4736.669 14501.015 180.00 1.39373 0.01  
12 10 8 o 975.761 3444.238 180.00 1.40948 0.00  
14 10 4 o -249.416 4421.743 0.00 1.40041 0.00  
13 11 5 o 2147.586 6002.125 180.00 1.39373 0.00  
15 9 3 o 1517.313 3790.261 0.00 1.39373 0.00  
17 5 3 o 348.706 414.877 0.00 1.37636 0.00  
16 8 0 o 40637.37 81867.02 180.00 1.38280 0.02  
18 2 2 o 0.730 1.114 0.00 1.35758 0.00  
16 8 2 o 34359.293 35757.50 0.00 1.37424 0.03  
18 2 0 o 4224.046 3846.409 180.00 1.36583 0.00  
15 7 7 o 4890.965 5717.678 180.00 1.37636 0.00  
14 8 8 o 4180.478 4300.302 180.00 1.37424 0.00  
12 12 6 o 91414.20 94254.36 0.00 1.37424 0.04  
16 6 6 o 766020.6 688246.1 0.00 1.36583 0.35  
11 11 9 o 453.423 527.404 0.00 1.37636 0.00  
15 9 5 o 70502.02 68966.97 180.00 1.35963 0.06  
17 5 5 o 296574.59 293419.66 0.00 1.34349 0.12  
14 10 6 o 8244.829 8654.954 180.00 1.35758 0.01  
16 8 4 o 19132.484 16386.277 180.00 1.34947 0.02  
13 9 9 o 150037.25 145890.97 180.00 1.35963 0.07  
17 7 1 o 2.244 2.062 0.00 1.34349 0.00  
18 4 2 o 337.403 323.855 0.00 1.33369 0.00  
13 11 7 o 6987.583 6791.881 0.00 1.34349 0.01  
13 13 1 o 17962.160 17362.734 0.00 1.34349 0.01  
17 7 3 o 3683.446 4165.302 180.00 1.32791 0.00  
14 12 2 o 145038.72 136249.89 0.00 1.33369 0.11  
13 13 3 o 135570.45 150237.97 0.00 1.32791 0.05  
15 11 1 o 2656.939 2932.744 0.00 1.32791 0.00  
12 10 10 o 12158.741 11164.903 0.00 1.33369 0.00  
18 4 4 o 437.286 449.222 0.00 1.31102 0.00  
19 1 1 o 88.279 84.130 180.00 1.29832 0.00  
15 11 3 o 130752.88 121028.93 0.00 1.31286 0.08

Supplementary Material (ESI) for Chemical Science  
This journal is (c) The Royal Society of Chemistry 2010

15 9 7 o 38187.24 35352.90 0.00 1.31286 0.03  
12 12 8 o 31990.455 47651.41 180.00 1.31845 0.01  
14 12 4 o 38188.40 39015.99 0.00 1.31102 0.02  
16 8 6 o 3924.260 4017.922 0.00 1.31102 0.00  
17 7 5 o 249283.63 227310.94 0.00 1.29832 0.15  
18 6 2 o 24.802 27.185 180.00 1.29653 0.00  
16 10 2 o 23732.211 20186.268 180.00 1.30371 0.01  
18 6 0 o 79778.81 68259.33 180.00 1.30371 0.02  
19 3 1 o 32225.713 43510.92 180.00 1.28424 0.02  
13 13 5 o 26397.607 23675.111 0.00 1.29832 0.01  
14 10 8 o 30103.369 25359.760 180.00 1.30371 0.02  
11 11 11 o 626556.0 545283.2 0.00 1.29832 0.06  
19 3 3 o 22136.928 23043.689 0.00 1.27061 0.01  
17 9 1 o 19398.268 24736.307 180.00 1.28424 0.01  
15 11 5 o 441.811 584.134 180.00 1.28424 0.00  
18 6 4 o 37517.64 56773.49 0.00 1.27567 0.02  
16 10 4 o 0.871 1.844 180.00 1.28251 0.00  
13 11 9 o 35826.49 44534.77 180.00 1.28424 0.02  
14 12 6 o 13756.503 20598.154 0.00 1.27567 0.01  
17 9 3 o 205629.84 205598.42 180.00 1.27061 0.10  
17 7 7 o 3936.256 13554.758 180.00 1.25741 0.00  
19 5 1 o 1643.289 5258.175 180.00 1.25741 0.00  
16 8 8 o 210021.94 230236.52 0.00 1.26232 0.05  
19 5 3 o 129942.38 105004.80 180.00 1.24461 0.05  
20 0 0 o -1390.947 43186.55 180.00 1.23681 0.00  
13 13 7 o 87.874 280.189 180.00 1.25741 0.00  
15 9 9 o 1255.137 3670.417 0.00 1.25741 0.00  
18 8 2 o 99115.20 124365.27 180.00 1.24937 0.04  
17 9 5 o 948.105 738.343 180.00 1.24461 0.00  
18 6 6 o 3560.587 4272.795 0.00 1.24304 0.00  
12 12 10 o 3032.806 21371.691 0.00 1.25579 0.00  
16 10 6 o 6747.894 8429.432 180.00 1.24937 0.00  
20 2 2 o -2187.037 25578.018 180.00 1.22463 0.00  
15 11 7 o 11703.477 8642.239 180.00 1.24461 0.00  
14 14 0 o 92016.80 112283.89 0.00 1.24937 0.01  
14 14 2 o 364.775 408.797 0.00 1.24304 0.00  
15 13 1 o 15108.701 10828.710 0.00 1.24461 0.01  
18 8 4 o -59.380 3819.141 180.00 1.23067 0.00  
14 10 10 o 3069.736 3320.509 180.00 1.24304 0.00  
19 5 5 o 3823.041 17549.412 0.00 1.22015 0.00  
15 13 3 o -3.889 0.774 0.00 1.23220 0.00  
16 12 0 o -1787.825 18331.102 180.00 1.23681 0.00  
16 12 2 o -549.494 11420.653 0.00 1.23067 0.00  
14 12 8 o -915.377 26052.135 180.00 1.23067 0.00  
20 4 2 o 352.586 1128.007 0.00 1.20700 0.00  
19 7 1 o 3021.027 11676.045 0.00 1.22015 0.00  
20 4 0 o 15260.179 52836.45 180.00 1.21279 0.00  
14 14 4 o -118.635 907.997 0.00 1.22463 0.00  
19 7 3 o 48112.12 49758.31 180.00 1.20844 0.01  
17 11 1 o 11009.990 36142.34 180.00 1.22015 0.00  
16 12 4 o 4024.432 12653.277 180.00 1.21279 0.00  
17 9 7 o 37595.47 36300.41 0.00 1.20844 0.01  
17 11 3 o 2664.210 2527.752 0.00 1.20844 0.00  
13 11 11 o 6903.303 19989.246 180.00 1.22015 0.00  
20 4 4 o 120349.77 92309.20 180.00 1.19012 0.01  
15 13 5 o 34240.766 32196.037 0.00 1.20844 0.01

Supplementary Material (ESI) for Chemical Science  
This journal is (c) The Royal Society of Chemistry 2010

13 13 9 o 16991.742 15071.945 0.00 1.20844 0.00  
18 8 6 o -1.644 87.272 180.00 1.20130 0.00  
16 10 8 o 642.083 1553.956 0.00 1.20700 0.00  
18 10 2 o 142.020 117.988 180.00 1.19567 0.00  
14 14 6 o 220800.53 180563.77 0.00 1.19567 0.02  
18 10 0 o -831.857 16294.994 180.00 1.20130 0.00  
21 1 1 o 19074.604 39843.75 0.00 1.17525 0.00  
19 7 5 o 2147.510 1481.227 180.00 1.18601 0.00  
15 11 9 o 46.196 71.722 0.00 1.19707 0.00  
17 11 5 o 220313.52 145227.81 180.00 1.18601 0.03  
20 6 2 o 152444.50 89723.34 180.00 1.17925 0.02  
16 12 6 o 11375.646 10706.395 180.00 1.18465 0.00  
18 10 4 o 1052.141 583.106 180.00 1.17925 0.00  
12 12 12 o 528343.1 361538.1 180.00 1.19012 0.02  
21 3 1 o -633.597 5712.232 180.00 1.16478 0.00  
20 6 4 o -386.695 7822.500 0.00 1.16349 0.00  
19 9 1 o 26148.148 32800.539 0.00 1.17525 0.00  
15 13 7 o 2879.440 3393.149 180.00 1.17525 0.00  
14 12 10 o 14054.198 7204.763 0.00 1.17925 0.00  
21 3 3 o 24773.867 12581.939 0.00 1.15459 0.00  
19 9 3 o -504.852 6848.065 0.00 1.16478 0.00  
17 9 9 o -1980.243 20999.467 180.00 1.16478 0.00  
18 8 8 o -967.185 22200.213 0.00 1.16349 0.00  
19 7 7 o 112244.90 55026.14 0.00 1.15459 0.00  
15 15 1 o -506.731 6942.636 180.00 1.16478 0.00  
18 10 6 o 20.071 9.748 0.00 1.15333 0.00  
14 14 8 o 4230.742 1780.311 180.00 1.15838 0.00  
16 14 2 o 73297.41 29780.602 0.00 1.15838 0.01  
21 5 1 o 3008.472 990.315 180.00 1.14466 0.00  
15 15 3 o 23829.441 11184.695 0.00 1.15459 0.00  
17 11 7 o 52231.68 24916.412 0.00 1.15459 0.00  
20 8 0 o 1611188.5 411955.5 0.00 1.14835 0.05  
16 10 10 o 7026.784 2745.721 180.00 1.15838 0.00  
19 9 5 o 5267.865 1568.518 0.00 1.14466 0.00  
20 6 6 o -3.747 234.853 0.00 1.13858 0.00  
17 13 1 o 58794.08 26828.730 0.00 1.15459 0.00  
13 13 11 o 35807.05 16394.678 180.00 1.15459 0.00  
20 8 2 o 1380.524 1601.004 180.00 1.14343 0.00  
16 12 8 o 8355.021 1953.843 0.00 1.14835 0.00  
21 5 3 o -721.075 9390.445 180.00 1.13498 0.00  
17 13 3 o 15737.676 4391.105 0.00 1.14466 0.00  
16 14 4 o 428.348 437.039 0.00 1.14343 0.00  
20 8 4 o -2646.759 28561.264 0.00 1.12905 0.00  
15 11 11 o 8453.088 2243.156 180.00 1.14466 0.00  
18 12 2 o -62.314 1051.699 0.00 1.13858 0.00  
22 2 2 o -128.915 4241.732 0.00 1.11520 0.00  
22 2 0 o -3907.114 56216.17 0.00 1.11976 0.00  
15 15 5 o -638.031 29143.365 0.00 1.13498 0.00  
15 13 9 o -225.956 2915.499 0.00 1.13498 0.00  
21 5 5 o -50.672 517.839 180.00 1.11633 0.00  
17 13 5 o -177.225 3435.452 180.00 1.12554 0.00  
18 12 4 o -97.421 1811.623 180.00 1.12437 0.00  
21 7 1 o -2.592 17.392 0.00 1.11633 0.00  
19 11 1 o -905.552 11887.913 180.00 1.12554 0.00  
18 10 8 o 308.280 300.753 180.00 1.11976 0.00  
16 14 6 o 13493.415 11416.340 180.00 1.11976 0.00

Supplementary Material (ESI) for Chemical Science  
This journal is (c) The Royal Society of Chemistry 2010

|    |    |      |           |           |        |         |      |
|----|----|------|-----------|-----------|--------|---------|------|
| 19 | 11 | 3 o  | -279.568  | 1101.583  | 180.00 | 1.11633 | 0.00 |
| 19 | 9  | 7 o  | -1230.318 | 13829.672 | 180.00 | 1.11633 | 0.00 |
| 14 | 12 | 12 o | -26.864   | 957.111   | 180.00 | 1.12437 | 0.00 |
| 21 | 7  | 3 o  | -915.922  | 14828.898 | 0.00   | 1.10735 | 0.00 |
| 22 | 4  | 2 o  | 639324.3  | 24144.439 | 0.00   | 1.10184 | 0.00 |
| 20 | 8  | 6 o  | -26.783   | 352.466   | 0.00   | 1.10624 | 0.00 |
| 17 | 11 | 9 o  | -6.618    | 1.118     | 180.00 | 1.11633 | 0.00 |
| 14 | 14 | 10 o | 3.000     | 30.111    | 0.00   | 1.11520 | 0.00 |
| 15 | 15 | 7 o  | -1611.260 | 29605.473 | 180.00 | 1.10735 | 0.00 |
| 22 | 4  | 4 o  | -420.172  | 12725.728 | 0.00   | 1.08895 | 0.00 |
| 18 | 12 | 6 o  | 1962159.9 | 62077.74  | 0.00   | 1.10184 | 0.01 |
| 20 | 10 | 2 o  | 1513957.9 | 48208.75  | 180.00 | 1.10184 | 0.00 |
| 16 | 12 | 10 o | -74.519   | 1735.601  | 180.00 | 1.10624 | 0.00 |
| 21 | 7  | 5 o  | -43.931   | 622.363   | 180.00 | 1.09001 | 0.00 |
| 17 | 13 | 7 o  | -4.476    | 0.008     | 0.00   | 1.09857 | 0.00 |
| 19 | 11 | 5 o  | -1254.817 | 17169.373 | 0.00   | 1.09857 | 0.00 |
| 23 | 1  | 1 o  | 848564.8  | 55487.71  | 0.00   | 1.07346 | 0.00 |
| 20 | 10 | 4 o  | -79.848   | 2076.732  | 0.00   | 1.08895 | 0.00 |
| 22 | 6  | 2 o  | 3208.280  | 118.913   | 0.00   | 1.08061 | 0.00 |
| 22 | 6  | 0 o  | 11696103. | 75534.98  | 180.00 | 1.08476 | 0.00 |
| 16 | 14 | 8 o  | -252.581  | 5260.558  | 0.00   | 1.08895 | 0.00 |
| 16 | 16 | 0 o  | -279.953  | 1160.140  | 180.00 | 1.09320 | 0.00 |
| 21 | 9  | 1 o  | 3915722.  | 73211.30  | 180.00 | 1.08164 | 0.01 |
| 15 | 13 | 11 o | -386.415  | 4415.642  | 180.00 | 1.09001 | 0.00 |
| 17 | 15 | 1 o  | -88.934   | 2255.903  | 0.00   | 1.09001 | 0.00 |
| 13 | 13 | 13 o | -141.408  | 472.166   | 180.00 | 1.09857 | 0.00 |
| 16 | 16 | 2 o  | -58.902   | 851.202   | 0.00   | 1.08895 | 0.00 |
| 17 | 15 | 3 o  | 1694578.6 | 30825.813 | 180.00 | 1.08164 | 0.00 |
| 19 | 9  | 9 o  | 269776.81 | 4943.006  | 180.00 | 1.08164 | 0.00 |
| 20 | 8  | 8 o  | 22856.309 | 60635.60  | 180.00 | 1.07651 | 0.00 |
| 18 | 14 | 2 o  | 110300.22 | 4775.297  | 180.00 | 1.08061 | 0.00 |
| 18 | 10 | 10 o | 336052.22 | 14416.889 | 0.00   | 1.08061 | 0.00 |
| 23 | 3  | 1 o  | 30809.498 | 7753.623  | 0.00   | 1.06546 | 0.00 |
| 18 | 14 | 0 o  | 155905.86 | 829.349   | 180.00 | 1.08476 | 0.00 |
| 21 | 9  | 3 o  | 152274.20 | 8870.828  | 180.00 | 1.07346 | 0.00 |
| 19 | 11 | 7 o  | 231427.11 | 12996.703 | 0.00   | 1.07346 | 0.00 |
| 22 | 6  | 4 o  | 268630.84 | 15897.639 | 180.00 | 1.06844 | 0.00 |
| 16 | 16 | 4 o  | -2654.105 | 39138.70  | 0.00   | 1.07651 | 0.00 |
| 21 | 7  | 7 o  | 3080.408  | 697.093   | 180.00 | 1.06546 | 0.00 |
| 19 | 13 | 1 o  | 782990.6  | 42364.52  | 180.00 | 1.07346 | 0.00 |
| 15 | 15 | 9 o  | 48937.18  | 2617.770  | 0.00   | 1.07346 | 0.00 |
| 20 | 10 | 6 o  | 45992.20  | 2519.854  | 180.00 | 1.06844 | 0.00 |
| 18 | 12 | 8 o  | 1534.691  | 156.204   | 180.00 | 1.07245 | 0.00 |
| 23 | 3  | 3 o  | -8396.249 | 138615.69 | 0.00   | 1.05764 | 0.00 |
| 17 | 11 | 11 o | 6206.060  | 195.022   | 0.00   | 1.07346 | 0.00 |
| 18 | 14 | 4 o  | 1269347.0 | 69496.41  | 180.00 | 1.06844 | 0.01 |
| 21 | 9  | 5 o  | -655.285  | 7729.662  | 180.00 | 1.05764 | 0.00 |
| 17 | 13 | 9 o  | 124100.01 | 23451.785 | 0.00   | 1.06546 | 0.00 |
| 17 | 15 | 5 o  | 13528.660 | 2521.516  | 0.00   | 1.06546 | 0.00 |
| 19 | 13 | 3 o  | 1343.300  | 271.765   | 180.00 | 1.06546 | 0.00 |
| 23 | 5  | 1 o  | 128099.50 | 25294.229 | 180.00 | 1.04999 | 0.00 |
| 14 | 14 | 12 o | 799500.4  | 40160.75  | 180.00 | 1.06844 | 0.00 |
| 22 | 6  | 6 o  | 168381.48 | 36100.55  | 0.00   | 1.04905 | 0.00 |
| 22 | 8  | 2 o  | -981.384  | 8077.358  | 180.00 | 1.05284 | 0.00 |
| 20 | 12 | 2 o  | -184.861  | 3564.161  | 0.00   | 1.05668 | 0.00 |
| 20 | 12 | 0 o  | -2088.219 | 42237.53  | 180.00 | 1.06056 | 0.00 |

```
16 16 6 o -70.928 2754.914 180.00 1.05668 0.00
16 12 12 o -2981.276 38478.96 0.00 1.06056 0.00
19 13 5 o 109192.79 18928.904 180.00 1.04999 0.00
18 14 6 o 5741.820 1166.955 180.00 1.04905 0.00
16 14 10 o -158.963 1537.741 0.00 1.05284 0.00
20 12 4 o 34756.754 6370.162 0.00 1.04530 0.00
_reflns_number_total 374
_reflns_limit_h_min 1
_reflns_limit_h_max 24
_reflns_limit_k_min 0
_reflns_limit_k_max 17
_reflns_limit_l_min 0
_reflns_limit_l_max 13
_reflns_d_resolution_high 1.045
_reflns_d_resolution_low 14.281
#--eof--eof--eof--eof--eof--eof--eof--eof--eof--eof--eof--eof--eof--#
```

**Table S4** CIF files for Ru(1%)/Na-Y zeolite after (a) NO<sub>x</sub> saturation and after (b) NO<sub>x</sub> regeneration. No H<sub>2</sub> was used during regeneration.

(a)

```
data_ADSREV_publ

_pd_block_id
2010-07-27T10:33|ADSHRGB|CEAK|stadip

_audit_creation_method "from EXP file using GSAS2CIF"
_audit_creation_date 2010-07-27T10:33
_audit_author_name CEAK
_audit_update_record
; 2010-07-27T10:33 Initial CIF as created by GSAS2CIF
;

_refine_ls_shift/su_max 3.57
_refine_ls_shift/su_mean 0.85
_computing_structure_refinement GSAS
_refine_ls_number_parameters 49
_refine_ls_goodness_of_fit_all 0.92
_refine_ls_number_restraints 0
_refine_ls_matrix_type full

_pd_phase_name
"Ru1% NaY adsorbed NOx no H2"
_cell_length_a 24.70180(18)
_cell_length_b 24.7018
_cell_length_c 24.7018
_cell_angle_alpha 90.0
_cell_angle_beta 90.0
_cell_angle_gamma 90.0
_cell_volume 15072.52(32)
_symmetry_cell_setting cubic
_symmetry_space_group_name_H-M "F d -3 m"

loop_
```



**Supplementary Material (ESI) for Chemical Science**  
**This journal is (c) The Royal Society of Chemistry 2010**

```

_atom_site_type_symbol
_atom_site_label
_atom_site_fract_x
_atom_site_fract_y
_atom_site_fract_z
_atom_site_occupancy
_atom_site_thermal_displace_type
_atom_site_U_iso_or_equiv
_atom_site_symmetry_multiplicity
O
O1  0.89305(15) 0.10694(15) 0.0      1.0      Uiso  0.0008(24) 96
O
O2  0.96627(25) 0.07873(15) 0.07873(15) 1.0      Uiso  0.0098(25) 96
O
O3  1.00023(15) 0.14204(21) 1.00023(15) 1.0      Uiso  0.0043(23) 96
O
O4  0.92696(18) 0.17756(15) 0.07244(15) 1.0      Uiso  0.0145(26) 96
Si
T1  0.94646(9)  0.12572(9)  0.03614(8)  1.0      Uiso  0.0040(4)  192
Na
sii 0.23499(13) 0.23499(13) 0.23499(13) 0.915(11) Uiso  0.0102(34) 32
Na
Si' 0.0675(6)  0.0675(6)  0.0675(6)  0.257(10) Uiso  0.088(16)  32
Na
siii 0.375      0.375      0.2101(17) 0.186(16) Uiso  0.037(23)  48
Na
sV  0.5      0.5      0.5      0.243(14) Uiso  0.002(19)  16
Ru
ru  0.0      0.0      0.0      0.0970(33) Uiso  0.002(11)  16
O
ow1 0.3196(7) 0.3196(7) 0.5207(9) 0.245(10) Uiso  0.016(14) 96
O
ow2 0.3090(10) 0.3090(10) 0.2163(12) 0.180(9) Uiso  0.036(19) 96
O
O14 0.375      0.375      0.6016(22) 0.188(19) Uiso  0.045(31) 48
O
O15 0.375      0.375      0.4644(19) 0.188(13) Uiso  0.040(25) 48
N
N16 0.248(7)  0.398(6)  0.459(10)  0.01      Uiso  0.025      192
N
N17 0.300(7)  0.347(6)  0.440(6)   0.01      Uiso  0.025      192
N
on1 0.271(7)  0.438(6)  0.462(11)  0.01      Uiso  0.025      192
N
on2 0.345(7)  0.364(6)  0.435(7)   0.01      Uiso  0.025      192
N
on3 0.282(7)  0.301(6)  0.435(7)   0.01      Uiso  0.025      192

_chemical_formula_sum      "N0.05 Na0.26 O2.31 Ru0.01 Si"
_chemical_formula_weight    72.54
_cell_formula_units_Z      192

loop__atom_type_symbol
__atom_type_number_in_cell
__atom_type_scatter_dispersion_real
__atom_type_scatter_dispersion_imag

```

```
_atom_type_scatter_Cromer_Mann_a1
_atom_type_scatter_Cromer_Mann_a2
_atom_type_scatter_Cromer_Mann_a3
_atom_type_scatter_Cromer_Mann_a4
_atom_type_scatter_Cromer_Mann_b1
_atom_type_scatter_Cromer_Mann_b2
_atom_type_scatter_Cromer_Mann_b3
_atom_type_scatter_Cromer_Mann_b4
_atom_type_scatter_Cromer_Mann_c
_atom_type_scatter_source
O      442.937  0.000  0.000
3.04850 13.2771 2.28680 5.70110 1.54630 0.32390 0.86700 32.9089 0.25080
International_Tables_Vol_C
Si     192.0  0.000  0.000
6.29150 2.43860 3.03530 32.3337 1.98910 0.67850 1.54100 81.6937 1.14070
International_Tables_Vol_C
Na     50.322  0.000  0.000
4.76260 3.28500 3.17360 8.84220 1.26740 0.31360 1.11280 129.424 0.67600
International_Tables_Vol_C
Ru     1.552  0.000  0.000
19.2674 0.80852 12.9182 8.43467 4.86337 24.7997 1.56756 94.2928 5.37874
International_Tables_Vol_C
N      9.6  0.000  0.000
12.2126 0.00570 3.13220 9.89330 2.01250 28.9975 1.16630 0.58260 -11.529
International_Tables_Vol_C
_diffraction_radiation_probe      x-ray
_diffraction_radiation_polarisation_ratio  0.0
_diffraction_radiation_wavelength  1.540562
_diffraction_radiation_type        Cu_K\alpha~1~
_pd_proc_ls_profile_R_factor        0.0407
_pd_proc_ls_profile_wR_factor       0.0550
_pd_proc_ls_profile_wR_expected     0.0599
_refine_ls_R_Fsqd_factor            0.12834

_pd_proc_ls_background_function
; GSAS Background function number 1 with 10 terms.
Shifted Chebyshev function of 1st kind
  1: 153.372  2: -117.997  3: 70.3842  4: -38.2430
  5: 24.3030  6: -29.1598  7: 36.6038  8: -20.2819
  9: 9.56488 10: 0.510292
;

_pd_spec_mounting
;sealed glass capillary .7mm outer diameter packing density 40%
;
_pd_spec_mount_mode      'transmission'
_pd_spec_shape           'cylinder'
_exptl_absorption_process_details
; GSAS Absorption/surface roughness correction: function number 0
Debye-Scherrer absorption correction
Term (= MU.r/wave) = 1.7234
Correction is not refined.
;
_exptl_absorption_correction_T_min  0.02124
_exptl_absorption_correction_T_max  0.07327
```

Supplementary Material (ESI) for Chemical Science  
This journal is (c) The Royal Society of Chemistry 2010

```
_pd_proc_ls_profile_function
;
CW Profile function number 3 with 19 terms
Pseudovoigt profile coefficients as parameterized in
P. Thompson, D.E. Cox & J.B. Hastings (1987). J. Appl. Cryst.,20,79-83.
Asymmetry correction of L.W. Finger, D.E. Cox & A. P. Jephcoat (1994).
J. Appl. Cryst.,27,892-900.
#1(GU) = 0.000 #2(GV) = -1.425 #3(GW) = 3.831
#4(GP) = 0.000 #5(LX) = 1.489 #6(LY) = 0.130
#7(S/L) = 0.0329 #8(H/L) = 0.0181
#9(trns) = 0.00 #10(shft)= 0.0000
#11(stec)= 0.00 #12(ptec)= 0.00 #13(sfec)= 0.00
#14(L11) = 0.066 #15(L22) = 0.066 #16(L33) = 0.016
#17(L12) = 0.000 #18(L13) = -0.003 #19(L23) = 0.003
Peak tails are ignored where the intensity is below 0.0010 times the peak
Aniso. broadening axis 0.0 0.0 1.0
;
_pd_proc_ls_peak_cutoff 0.00100
_pd_proc_info_datetime 2010-07-27T10:33:47
_pd_calc_method "Rietveld Refinement"

_pd_meas_2theta_range_min 3.0
_pd_meas_2theta_range_max 94.99
_pd_meas_2theta_range_inc 0.01
_pd_proc_2theta_range_min 2.99081
_pd_proc_2theta_range_max 94.9808
_pd_proc_2theta_range_inc 0.01

loop_
_refln_index_h
_refln_index_k
_refln_index_l
_refln_observed_status
_refln_F_squared_meas
_refln_F_squared_calc
_refln_phase_calc
_refln_d_spacing
_gsas_i100_meas
1 1 1 o 1659701.5 1659874.6 180.00 14.26159 100.00
2 2 0 o 439506.7 437285.9 0.00 8.73341 15.02
3 1 1 o 252171.97 253988.53 0.00 7.44787 12.59
2 2 2 o 60336.45 62568.59 180.00 7.13080 0.93
4 0 0 o 1095.797 842.791 0.00 6.17545 0.01
3 3 1 o 665876.9 666811.1 180.00 5.66698 19.54
4 2 2 o 7652.867 6505.881 180.00 5.04223 0.18
5 1 1 o 134157.78 130738.27 0.00 4.75386 2.82
3 3 3 o 119036.22 116049.80 0.00 4.75386 0.83
4 4 0 o 360415.8 350634.84 180.00 4.36670 3.20
5 3 1 o 17516.734 16833.367 0.00 4.17537 0.57
4 4 2 o 17360.129 17613.088 180.00 4.11697 0.27
6 2 0 o 104739.51 104983.48 0.00 3.90570 1.50
5 3 3 o 833736.6 807448.3 180.00 3.76699 11.08
6 2 2 o 19020.016 18692.617 180.00 3.72394 0.25
4 4 4 o 2086.574 1655.291 0.00 3.56540 0.01
5 5 1 o 62501.12 65090.15 0.00 3.45894 0.71
7 1 1 o 2593.827 2702.169 180.00 3.45894 0.03
```

Supplementary Material (ESI) for Chemical Science  
This journal is (c) The Royal Society of Chemistry 2010

|    |   |   |   |           |           |        |         |      |
|----|---|---|---|-----------|-----------|--------|---------|------|
| 6  | 4 | 2 | o | 362334.0  | 368144.4  | 180.00 | 3.30092 | 7.43 |
| 7  | 3 | 1 | o | 8986.820  | 9393.815  | 0.00   | 3.21590 | 0.18 |
| 5  | 5 | 3 | o | 1204.662  | 1261.039  | 180.00 | 3.21590 | 0.01 |
| 8  | 0 | 0 | o | 67224.92  | 65891.47  | 0.00   | 3.08773 | 0.15 |
| 7  | 3 | 3 | o | 121954.70 | 124253.71 | 180.00 | 3.01781 | 1.06 |
| 6  | 4 | 4 | o | 2353.725  | 2259.445  | 180.00 | 2.99553 | 0.02 |
| 6  | 6 | 0 | o | 531278.6  | 531554.8  | 0.00   | 2.91114 | 2.13 |
| 8  | 2 | 2 | o | 136558.16 | 136427.91 | 0.00   | 2.91114 | 1.10 |
| 7  | 5 | 1 | o | 52544.52  | 52751.55  | 0.00   | 2.85232 | 0.80 |
| 6  | 6 | 2 | o | 1039.128  | 1033.973  | 180.00 | 2.83349 | 0.01 |
| 5  | 5 | 5 | o | 2667860.8 | 2683572.8 | 180.00 | 2.85232 | 6.81 |
| 8  | 4 | 0 | o | 462007.8  | 463532.4  | 0.00   | 2.76175 | 3.32 |
| 9  | 1 | 1 | o | 8704.093  | 8520.556  | 180.00 | 2.71138 | 0.06 |
| 7  | 5 | 3 | o | 104103.21 | 101794.16 | 0.00   | 2.71138 | 1.43 |
| 8  | 4 | 2 | o | 49745.85  | 50645.00  | 0.00   | 2.69519 | 0.67 |
| 6  | 6 | 4 | o | 614533.2  | 609207.3  | 180.00 | 2.63322 | 4.03 |
| 9  | 3 | 1 | o | 201840.34 | 196578.69 | 0.00   | 2.58945 | 2.54 |
| 8  | 4 | 4 | o | 202289.97 | 196892.02 | 0.00   | 2.52112 | 1.21 |
| 7  | 7 | 1 | o | 2084.855  | 1986.674  | 180.00 | 2.48263 | 0.01 |
| 9  | 3 | 3 | o | 87.359    | 84.083    | 0.00   | 2.48262 | 0.00 |
| 7  | 5 | 5 | o | 52418.31  | 50218.91  | 180.00 | 2.48263 | 0.32 |
| 8  | 6 | 2 | o | 5489.810  | 4920.390  | 0.00   | 2.42221 | 0.07 |
| 10 | 2 | 0 | o | 1878.635  | 1737.079  | 0.00   | 2.42221 | 0.01 |
| 9  | 5 | 1 | o | 3678.798  | 3660.051  | 180.00 | 2.38801 | 0.03 |
| 7  | 7 | 3 | o | 69326.80  | 68979.33  | 0.00   | 2.38801 | 0.37 |
| 10 | 2 | 2 | o | 21713.326 | 21532.553 | 180.00 | 2.37693 | 0.11 |
| 6  | 6 | 6 | o | 1034780.6 | 1028456.7 | 0.00   | 2.37693 | 1.74 |
| 9  | 5 | 3 | o | 898.140   | 876.776   | 0.00   | 2.30346 | 0.01 |
| 8  | 6 | 4 | o | 10151.340 | 9789.740  | 180.00 | 2.29351 | 0.09 |
| 10 | 4 | 2 | o | 54.716    | 51.542    | 0.00   | 2.25496 | 0.00 |
| 11 | 1 | 1 | o | 167422.11 | 163917.91 | 180.00 | 2.22729 | 0.77 |
| 7  | 7 | 5 | o | 101665.87 | 99736.77  | 0.00   | 2.22729 | 0.45 |
| 8  | 8 | 0 | o | 754891.1  | 744740.1  | 0.00   | 2.18335 | 1.53 |
| 9  | 7 | 1 | o | 23399.248 | 23102.742 | 0.00   | 2.15821 | 0.19 |
| 11 | 3 | 1 | o | 49205.42  | 48550.23  | 180.00 | 2.15821 | 0.41 |
| 8  | 8 | 2 | o | 3786.622  | 3747.255  | 180.00 | 2.15002 | 0.01 |
| 9  | 5 | 5 | o | 26304.680 | 25947.857 | 180.00 | 2.15821 | 0.11 |
| 10 | 4 | 4 | o | 38317.62  | 37920.69  | 0.00   | 2.15002 | 0.15 |
| 10 | 6 | 0 | o | 33795.059 | 33079.121 | 0.00   | 2.11816 | 0.14 |
| 8  | 6 | 6 | o | 7898.516  | 7728.902  | 0.00   | 2.11816 | 0.03 |
| 11 | 3 | 3 | o | 337010.06 | 336166.81 | 0.00   | 2.09518 | 1.23 |
| 9  | 7 | 3 | o | 61883.96  | 61717.29  | 180.00 | 2.09518 | 0.48 |
| 10 | 6 | 2 | o | 45439.39  | 45138.92  | 180.00 | 2.08768 | 0.34 |
| 12 | 0 | 0 | o | 293862.84 | 288888.88 | 180.00 | 2.05848 | 0.29 |
| 8  | 8 | 4 | o | 99275.19  | 97636.36  | 180.00 | 2.05848 | 0.37 |
| 11 | 5 | 1 | o | 1069.671  | 1042.332  | 0.00   | 2.03737 | 0.01 |
| 7  | 7 | 7 | o | 131132.45 | 128962.74 | 0.00   | 2.03737 | 0.15 |
| 10 | 6 | 4 | o | 397.385   | 373.734   | 0.00   | 2.00358 | 0.00 |
| 12 | 2 | 2 | o | 4501.238  | 4278.404  | 0.00   | 2.00358 | 0.01 |
| 9  | 7 | 5 | o | 26680.506 | 25427.840 | 180.00 | 1.98410 | 0.18 |
| 11 | 5 | 3 | o | 2.547     | 1.686     | 0.00   | 1.98410 | 0.00 |
| 12 | 4 | 0 | o | 10213.274 | 9732.139  | 0.00   | 1.95285 | 0.03 |
| 9  | 9 | 1 | o | 64116.25  | 63814.76  | 180.00 | 1.93479 | 0.19 |
| 12 | 4 | 2 | o | 91413.31  | 91438.74  | 0.00   | 1.92889 | 0.55 |
| 8  | 8 | 6 | o | 176396.89 | 176592.47 | 0.00   | 1.92889 | 0.53 |
| 10 | 8 | 2 | o | 200877.88 | 200155.13 | 0.00   | 1.90579 | 1.20 |

Supplementary Material (ESI) for Chemical Science  
This journal is (c) The Royal Society of Chemistry 2010

9 9 3 o 50053.78 49776.76 0.00 1.88899 0.14  
13 1 1 o 32495.561 32319.861 180.00 1.88899 0.09  
11 7 1 o 170.317 169.627 0.00 1.88899 0.00  
11 5 5 o 243.493 242.268 180.00 1.88899 0.00  
10 6 6 o 10469.378 10325.482 180.00 1.88349 0.03  
12 4 4 o 34348.238 34266.395 0.00 1.86197 0.10  
11 7 3 o 66398.41 66179.90 0.00 1.84630 0.36  
13 3 1 o 17833.176 17771.516 180.00 1.84630 0.10  
10 8 4 o 5787.169 5780.381 180.00 1.84116 0.03  
9 7 7 o 133589.05 133190.67 0.00 1.84630 0.36  
12 6 2 o 45833.75 45040.05 180.00 1.82104 0.24  
9 9 5 o 176051.22 172164.55 0.00 1.80638 0.44  
13 3 3 o 13575.191 13266.121 0.00 1.80637 0.04  
13 5 1 o 95548.59 95072.88 180.00 1.76893 0.45  
11 7 5 o 134148.53 133514.95 180.00 1.76893 0.64  
12 6 4 o 453.332 450.802 180.00 1.76441 0.00  
14 2 0 o 154833.14 152948.66 180.00 1.74668 0.35  
10 10 0 o 1177342.3 1163275.5 180.00 1.74668 1.32  
8 8 8 o 402319.0 399189.3 0.00 1.78270 0.32  
11 9 1 o 267.282 259.502 180.00 1.73373 0.00  
10 8 6 o 8432.680 8330.354 0.00 1.74668 0.04  
14 2 2 o 2377.648 2319.620 0.00 1.72947 0.01  
10 10 2 o 8789.574 8576.805 180.00 1.72947 0.02  
13 5 3 o 691.918 678.629 0.00 1.73373 0.00  
12 8 0 o 42309.98 41501.84 0.00 1.71276 0.09  
11 9 3 o 488954.0 485788.8 180.00 1.70054 1.99  
12 8 2 o 14460.031 14405.974 180.00 1.69653 0.06  
9 9 7 o 22959.188 22811.596 0.00 1.70054 0.05  
10 10 4 o 46456.78 45619.82 180.00 1.68074 0.09  
14 4 2 o 32977.105 32379.859 180.00 1.68075 0.13  
13 7 1 o 10571.652 10340.885 0.00 1.66919 0.04  
12 6 6 o 40188.62 39443.34 180.00 1.68074 0.08  
11 7 7 o 45443.04 44461.38 180.00 1.66919 0.09  
13 5 5 o 20902.715 20460.365 180.00 1.66919 0.04  
12 8 4 o 73282.38 70515.55 180.00 1.65046 0.27  
13 7 3 o 50945.95 49290.12 0.00 1.63952 0.18  
11 9 5 o 4049.220 3917.313 0.00 1.63952 0.01  
15 1 1 o 34966.781 33813.219 180.00 1.63952 0.06  
14 4 4 o 29577.520 28339.377 0.00 1.63592 0.05  
14 6 0 o 1486.177 1386.672 180.00 1.62175 0.00  
10 8 8 o 19365.266 18553.652 0.00 1.63592 0.03  
15 3 1 o 4375.027 4240.417 0.00 1.61137 0.02  
14 6 2 o 150402.66 147092.13 0.00 1.60795 0.48  
10 10 6 o 13390.821 13100.627 180.00 1.60795 0.02  
11 11 1 o 523772.6 516387.8 0.00 1.58462 0.83  
13 7 5 o 27793.631 27395.211 0.00 1.58462 0.09  
15 3 3 o 71047.69 70046.18 180.00 1.58462 0.11  
12 8 6 o 13270.509 13188.052 0.00 1.58137 0.04  
12 10 2 o 2358.637 2314.568 180.00 1.56857 0.01  
15 5 1 o 3415.644 3395.632 0.00 1.55916 0.01  
13 9 1 o 62628.63 62249.86 180.00 1.55916 0.18  
11 11 3 o 17398.514 17298.057 0.00 1.55916 0.02  
14 6 4 o 39213.56 38427.79 0.00 1.56857 0.12  
9 9 9 o 3324.078 3264.669 0.00 1.58462 0.00  
11 9 7 o 66571.56 66219.26 0.00 1.55916 0.19  
16 0 0 o 774209.4 761914.7 0.00 1.54386 0.27

Supplementary Material (ESI) for Chemical Science  
This journal is (c) The Royal Society of Chemistry 2010

15 5 3 o 119658.63 117510.89 0.00 1.53490 0.32  
13 9 3 o 41033.78 40285.70 180.00 1.53490 0.11  
12 10 4 o 3023.461 2973.249 0.00 1.53194 0.01  
16 2 2 o 134.604 131.668 0.00 1.52029 0.00  
14 8 2 o 46699.05 45520.54 180.00 1.52029 0.12  
11 11 5 o 485979.3 475899.5 180.00 1.51173 0.60  
13 7 7 o 5009.804 4899.337 180.00 1.51173 0.01  
10 10 8 o 117414.77 114368.62 0.00 1.52029 0.15  
14 6 6 o 2425.378 2390.225 0.00 1.50890 0.00  
16 4 0 o 87117.26 85613.77 0.00 1.49777 0.11  
13 9 5 o 77710.91 75949.02 180.00 1.48957 0.18  
15 7 1 o 42105.25 41177.13 180.00 1.48957 0.10  
15 5 5 o 78184.14 76393.48 180.00 1.48957 0.09  
12 8 8 o 519778.0 510903.1 0.00 1.49777 0.62  
16 4 2 o 8809.799 8668.583 180.00 1.48687 0.02  
14 8 4 o 12.731 12.475 0.00 1.48687 0.00  
12 10 6 o 291108.09 287819.88 180.00 1.47622 0.65  
15 7 3 o 46277.48 45409.68 0.00 1.46837 0.10  
12 12 0 o 1626263.3 1597509.3 0.00 1.45557 0.84  
13 11 1 o 70531.15 69368.00 0.00 1.44805 0.14  
17 1 1 o 190679.56 187553.81 180.00 1.44805 0.19  
16 4 4 o 3602.969 3538.694 180.00 1.45557 0.00  
12 12 2 o 31504.430 31048.553 0.00 1.44556 0.03  
11 9 9 o 52252.84 51258.55 0.00 1.46837 0.06  
11 11 7 o 33.497 32.669 180.00 1.44805 0.00  
16 6 2 o 1844.883 1809.967 0.00 1.43576 0.00  
14 10 0 o 65251.41 64076.97 180.00 1.43576 0.06  
17 3 1 o 1530.467 1479.207 180.00 1.42854 0.00  
13 11 3 o 59630.96 57686.93 0.00 1.42854 0.11  
14 8 6 o 309988.41 304493.88 180.00 1.43576 0.59  
14 10 2 o 7822.325 7480.926 180.00 1.42616 0.01  
13 9 7 o 26.698 26.128 0.00 1.42854 0.00  
15 7 5 o 353.587 341.867 0.00 1.42854 0.00  
12 12 4 o 2954.044 2694.320 0.00 1.41675 0.00  
17 3 3 o 2208.924 2061.394 180.00 1.40981 0.00  
15 9 1 o 12718.249 11633.651 180.00 1.40981 0.02  
16 6 4 o 1144.660 1049.674 180.00 1.40752 0.00  
10 10 10 o 33.578 30.996 180.00 1.42616 0.00  
12 10 8 o 349.730 322.080 180.00 1.40752 0.00  
14 10 4 o 703.837 617.777 0.00 1.39846 0.00  
13 11 5 o 4424.837 4097.711 180.00 1.39179 0.01  
17 5 1 o 47492.81 44111.92 180.00 1.39179 0.07  
15 9 3 o 16116.273 14963.827 180.00 1.39179 0.03  
16 8 0 o 32.337 31.863 0.00 1.38087 0.00  
17 5 3 o 108.626 103.997 0.00 1.37445 0.00  
16 8 2 o 119722.91 115780.57 0.00 1.37232 0.17  
12 12 6 o 99439.68 96184.50 0.00 1.37232 0.07  
11 11 9 o 7816.751 7487.292 0.00 1.37445 0.01  
15 7 7 o 16496.150 15831.494 180.00 1.37445 0.01  
14 8 8 o 232.668 225.374 180.00 1.37232 0.00  
18 2 0 o 8002.108 7871.741 180.00 1.36393 0.01  
15 9 5 o 104123.88 102472.98 180.00 1.35773 0.14  
16 6 6 o 1406431.9 1382897.9 0.00 1.36393 0.96  
18 2 2 o 14653.742 14433.203 180.00 1.35569 0.01  
14 10 6 o 3428.109 3378.732 0.00 1.35569 0.00  
13 13 1 o 45672.16 45047.40 0.00 1.34162 0.03

Supplementary Material (ESI) for Chemical Science  
This journal is (c) The Royal Society of Chemistry 2010

17 7 1 o 5110.455 5045.901 0.00 1.34162 0.01  
13 9 9 o 254872.94 250855.72 180.00 1.35773 0.17  
16 8 4 o 63596.01 62234.00 180.00 1.34759 0.08  
17 5 5 o 673825.4 664480.7 0.00 1.34162 0.41  
13 11 7 o 13644.638 13464.316 0.00 1.34162 0.02  
14 12 2 o 198547.83 194211.91 0.00 1.33183 0.22  
18 4 2 o 8381.719 8188.179 0.00 1.33183 0.01  
13 13 3 o 181198.41 175446.53 0.00 1.32606 0.10  
17 7 3 o 2251.344 2187.067 0.00 1.32606 0.00  
15 11 1 o 68.742 66.271 0.00 1.32606 0.00  
12 10 10 o 115365.00 112711.52 0.00 1.33183 0.07  
15 11 3 o 196021.38 191219.75 0.00 1.31104 0.19  
14 12 4 o 21132.031 20766.105 0.00 1.30919 0.02  
18 4 4 o 2092.370 2055.968 180.00 1.30919 0.00  
12 12 8 o 13218.251 12707.861 180.00 1.31661 0.01  
15 9 7 o 48509.70 47298.02 0.00 1.31104 0.05  
16 10 2 o 41530.52 40659.36 180.00 1.30190 0.04  
18 6 0 o 102209.50 100028.08 180.00 1.30190 0.05  
16 8 6 o 1138.374 1118.472 0.00 1.30919 0.00  
19 1 1 o 7771.260 7596.541 0.00 1.29651 0.00  
17 7 5 o 243462.56 237987.63 0.00 1.29651 0.22  
13 13 5 o 21315.232 20873.654 180.00 1.29651 0.01  
18 6 2 o 792.850 777.188 0.00 1.29473 0.00  
14 10 8 o 134661.16 131769.44 180.00 1.30190 0.12  
19 3 1 o 81168.46 77983.27 180.00 1.28245 0.06  
15 11 5 o 1285.270 1226.822 180.00 1.28245 0.00  
17 9 1 o 77018.84 74025.95 180.00 1.28245 0.06  
11 11 11 o 1859946.0 1816713.8 0.00 1.29651 0.27  
16 10 4 o 3502.288 3370.545 0.00 1.28073 0.00  
13 11 9 o 89571.74 86085.47 180.00 1.28245 0.07  
14 12 6 o 14734.795 14063.822 0.00 1.27390 0.01  
18 6 4 o 39761.20 37910.55 0.00 1.27390 0.03  
17 9 3 o 287717.09 277411.81 180.00 1.26885 0.20  
19 3 3 o 96826.83 93331.13 0.00 1.26885 0.03  
19 5 1 o 3228.863 3056.238 180.00 1.25566 0.00  
13 13 7 o 33914.441 32162.188 0.00 1.25566 0.01  
18 8 2 o 112842.77 107642.01 180.00 1.24763 0.06  
14 14 0 o 69308.05 66018.04 0.00 1.24763 0.01  
16 8 8 o 344807.41 329374.56 0.00 1.26056 0.11  
19 5 3 o 347815.81 329892.00 180.00 1.24288 0.19  
15 13 1 o 4366.667 4134.965 0.00 1.24288 0.00  
17 7 7 o 4569.578 4306.491 180.00 1.25566 0.00  
15 9 9 o 225.985 213.503 180.00 1.25566 0.00  
14 14 2 o 10074.568 9570.426 0.00 1.24131 0.00  
16 10 6 o 52954.55 50513.14 180.00 1.24763 0.03  
12 12 10 o 23786.592 22479.438 0.00 1.25404 0.01  
17 9 5 o 2.096 1.791 0.00 1.24288 0.00  
15 11 7 o 43433.16 41179.80 180.00 1.24288 0.02  
16 12 0 o 52750.00 47240.41 180.00 1.23509 0.01  
20 0 0 o 26426.689 23696.205 180.00 1.23509 0.00  
18 6 6 o 7352.269 6989.270 0.00 1.24131 0.00  
15 13 3 o 8955.322 7965.602 0.00 1.23048 0.00  
18 8 4 o 29402.936 25943.848 180.00 1.22896 0.01  
16 12 2 o 17258.455 15224.454 0.00 1.22896 0.01  
14 10 10 o 20215.455 19259.469 180.00 1.24131 0.01  
14 14 4 o 8779.578 7684.938 0.00 1.22292 0.00

Supplementary Material (ESI) for Chemical Science  
This journal is (c) The Royal Society of Chemistry 2010

|    |    |    |   |           |           |        |         |      |
|----|----|----|---|-----------|-----------|--------|---------|------|
| 20 | 2  | 2  | o | 119245.14 | 104968.56 | 180.00 | 1.22292 | 0.03 |
| 14 | 12 | 8  | o | 16028.252 | 14136.175 | 180.00 | 1.22896 | 0.01 |
| 19 | 7  | 1  | o | 52080.10  | 47060.29  | 0.00   | 1.21845 | 0.02 |
| 17 | 11 | 1  | o | 55189.00  | 49713.34  | 180.00 | 1.21845 | 0.02 |
| 19 | 5  | 5  | o | 11337.997 | 10236.681 | 0.00   | 1.21845 | 0.00 |
| 16 | 12 | 4  | o | 32710.182 | 29631.859 | 180.00 | 1.21111 | 0.01 |
| 20 | 4  | 0  | o | 32695.209 | 29566.838 | 180.00 | 1.21111 | 0.01 |
| 17 | 11 | 3  | o | 1334.984  | 1214.666  | 180.00 | 1.20676 | 0.00 |
| 15 | 13 | 5  | o | 107595.09 | 98068.08  | 0.00   | 1.20676 | 0.04 |
| 19 | 7  | 3  | o | 66652.27  | 60597.65  | 180.00 | 1.20676 | 0.02 |
| 20 | 4  | 2  | o | 1677.318  | 1531.588  | 0.00   | 1.20532 | 0.00 |
| 13 | 11 | 11 | o | 107863.86 | 97124.88  | 180.00 | 1.21845 | 0.02 |
| 13 | 13 | 9  | o | 18921.047 | 17160.771 | 0.00   | 1.20676 | 0.00 |
| 17 | 9  | 7  | o | 109247.60 | 99514.72  | 0.00   | 1.20676 | 0.04 |
| 18 | 8  | 6  | o | 203.429   | 177.121   | 0.00   | 1.19963 | 0.00 |
| 18 | 10 | 0  | o | 22519.010 | 20050.809 | 180.00 | 1.19963 | 0.00 |
| 16 | 10 | 8  | o | 16340.896 | 14927.419 | 0.00   | 1.20532 | 0.01 |
| 14 | 14 | 6  | o | 763805.8  | 699718.2  | 0.00   | 1.19401 | 0.10 |
| 18 | 10 | 2  | o | 401.092   | 364.186   | 0.00   | 1.19401 | 0.00 |
| 15 | 11 | 9  | o | 19934.748 | 18042.381 | 0.00   | 1.19540 | 0.01 |
| 20 | 4  | 4  | o | 141784.25 | 128982.67 | 180.00 | 1.18847 | 0.02 |
| 19 | 7  | 5  | o | 4136.714  | 3730.584  | 0.00   | 1.18436 | 0.00 |
| 17 | 11 | 5  | o | 379984.9  | 342620.88 | 180.00 | 1.18436 | 0.09 |
| 20 | 6  | 2  | o | 230059.70 | 198832.73 | 180.00 | 1.17761 | 0.05 |
| 16 | 12 | 6  | o | 3691.471  | 3329.428  | 180.00 | 1.18300 | 0.00 |
| 21 | 1  | 1  | o | 13205.937 | 10776.478 | 0.00   | 1.17362 | 0.00 |
| 19 | 9  | 1  | o | 166379.88 | 136893.42 | 0.00   | 1.17362 | 0.03 |
| 18 | 10 | 4  | o | 24961.506 | 21524.994 | 180.00 | 1.17761 | 0.01 |
| 12 | 12 | 12 | o | 815748.9  | 738182.1  | 180.00 | 1.18847 | 0.03 |
| 15 | 13 | 7  | o | 2158.888  | 1808.450  | 0.00   | 1.17362 | 0.00 |
| 14 | 12 | 10 | o | 17882.086 | 15447.253 | 0.00   | 1.17761 | 0.00 |
| 15 | 15 | 1  | o | 6785.820  | 4835.597  | 180.00 | 1.16316 | 0.00 |
| 19 | 9  | 3  | o | 2003.785  | 1460.250  | 180.00 | 1.16316 | 0.00 |
| 21 | 3  | 1  | o | 9269.698  | 6601.179  | 180.00 | 1.16316 | 0.00 |
| 20 | 6  | 4  | o | 35077.64  | 24998.242 | 0.00   | 1.16188 | 0.00 |
| 16 | 14 | 2  | o | 117036.91 | 79854.31  | 0.00   | 1.15677 | 0.01 |
| 18 | 8  | 8  | o | 29290.309 | 20932.111 | 0.00   | 1.16188 | 0.00 |
| 17 | 13 | 1  | o | 10113.345 | 6967.917  | 0.00   | 1.15298 | 0.00 |
| 21 | 3  | 3  | o | 135929.83 | 95506.31  | 0.00   | 1.15298 | 0.01 |
| 15 | 15 | 3  | o | 52127.22  | 36287.79  | 0.00   | 1.15298 | 0.00 |
| 17 | 9  | 9  | o | 74821.15  | 53647.55  | 180.00 | 1.16316 | 0.01 |
| 14 | 14 | 8  | o | 34371.719 | 23473.340 | 180.00 | 1.15677 | 0.00 |
| 17 | 11 | 7  | o | 76710.35  | 53802.46  | 0.00   | 1.15298 | 0.01 |
| 19 | 7  | 7  | o | 49555.78  | 34798.223 | 0.00   | 1.15298 | 0.00 |
| 20 | 8  | 0  | o | 1438982.1 | 982777.9  | 0.00   | 1.14675 | 0.07 |
| 18 | 10 | 6  | o | 9851.891  | 7046.129  | 180.00 | 1.15173 | 0.00 |
| 16 | 10 | 10 | o | 7813.422  | 5190.095  | 180.00 | 1.15677 | 0.00 |
| 19 | 9  | 5  | o | 59.261    | 1.789     | 180.00 | 1.14306 | 0.00 |
| 17 | 13 | 3  | o | 37123.91  | 21830.783 | 0.00   | 1.14306 | 0.00 |
| 21 | 5  | 1  | o | 89532.08  | 53097.01  | 180.00 | 1.14306 | 0.01 |
| 16 | 14 | 4  | o | 75.813    | 44.951    | 0.00   | 1.14184 | 0.00 |
| 20 | 8  | 2  | o | 3101.644  | 1690.918  | 0.00   | 1.14184 | 0.00 |
| 13 | 13 | 11 | o | 246.489   | 172.007   | 180.00 | 1.15298 | 0.00 |
| 16 | 12 | 8  | o | 17795.117 | 12302.395 | 0.00   | 1.14675 | 0.00 |
| 18 | 12 | 2  | o | 252.655   | 94.738    | 0.00   | 1.13699 | 0.00 |
| 20 | 6  | 6  | o | 27710.938 | 10214.401 | 0.00   | 1.13699 | 0.00 |



Supplementary Material (ESI) for Chemical Science  
This journal is (c) The Royal Society of Chemistry 2010

15 15 5 o 61618.97 20523.854 0.00 1.13340 0.00  
21 5 3 o 3.883 0.442 0.00 1.13340 0.00  
15 11 11 o 10411.838 6397.077 0.00 1.14306 0.00  
19 11 1 o 53353.75 12950.229 180.00 1.12397 0.00  
15 13 9 o 2693.337 862.697 0.00 1.13340 0.00  
20 8 4 o 141703.72 40671.61 0.00 1.12748 0.01  
22 2 0 o 390608.1 81474.29 0.00 1.11820 0.00  
17 13 5 o 15753.599 3911.227 180.00 1.12397 0.00  
18 12 4 o 33.861 6.360 0.00 1.12281 0.00  
19 11 3 o 8111.278 1216.725 180.00 1.11478 0.00  
21 7 1 o 20847.299 3940.600 0.00 1.11478 0.00  
22 2 2 o 160456.50 27602.895 0.00 1.11364 0.00  
16 14 6 o 45685.02 9532.403 180.00 1.11820 0.00  
19 9 7 o 99049.63 18266.660 180.00 1.11478 0.00  
21 5 5 o 89851.26 17069.445 180.00 1.11478 0.00  
18 10 8 o 35660.62 7647.455 180.00 1.11820 0.00  
14 12 12 o 2.839 0.073 180.00 1.12281 0.00  
21 7 3 o 336968.47 43933.86 0.00 1.10580 0.00  
17 11 9 o 36784.71 6858.638 180.00 1.11478 0.00  
14 14 10 o 28155.859 4889.941 0.00 1.11364 0.00  
22 4 2 o 608543.8 71471.26 0.00 1.10031 0.00  
20 10 2 o 772305.0 88951.52 180.00 1.10031 0.00  
15 15 7 o 385263.2 49583.52 180.00 1.10580 0.00  
20 8 6 o 4452.505 597.198 180.00 1.10470 0.00  
19 11 5 o 94904.16 8232.167 0.00 1.09705 0.00  
18 12 6 o 517149.3 60495.57 0.00 1.10031 0.00  
16 12 10 o 1356.660 196.170 180.00 1.10470 0.00  
16 16 0 o 679746.8 39541.77 180.00 1.09168 0.00  
17 13 7 o 13527.054 1097.488 180.00 1.09705 0.00  
17 15 1 o 2536.340 220.046 0.00 1.08849 0.00  
21 7 5 o 46994.36 3659.026 0.00 1.08849 0.00  
16 16 2 o 45042.07 4559.482 0.00 1.08744 0.00  
20 10 4 o 3817.642 382.754 0.00 1.08744 0.00  
22 4 4 o 86710.88 8940.392 0.00 1.08744 0.00  
22 6 0 o 2476951.5 311029.25 180.00 1.08325 0.00  
18 14 0 o 463509.9 57996.11 180.00 1.08325 0.00  
16 14 8 o 129089.60 13644.249 0.00 1.08744 0.00  
13 13 13 o 899420.3 76945.64 180.00 1.09705 0.00  
21 9 1 o 491328.7 68825.25 180.00 1.08013 0.00  
17 15 3 o 634999.9 87674.11 180.00 1.08013 0.00  
18 14 2 o 295.524 21.289 180.00 1.07910 0.00  
22 6 2 o 102472.58 15790.104 0.00 1.07910 0.00  
15 13 11 o 51693.88 3709.805 180.00 1.08849 0.00  
23 1 1 o 604394.3 150979.03 0.00 1.07197 0.00  
19 13 1 o 278994.09 70176.56 180.00 1.07197 0.00  
16 16 4 o 433802.5 96529.32 0.00 1.07501 0.00  
19 9 9 o 5692.887 770.931 180.00 1.08013 0.00  
18 10 10 o 10822.252 1698.307 0.00 1.07910 0.00  
19 11 7 o 109915.34 27024.715 0.00 1.07197 0.00  
21 9 3 o 63445.20 15523.093 180.00 1.07197 0.00  
18 12 8 o 2521.101 724.116 0.00 1.07096 0.00  
20 8 8 o 697.765 112.150 180.00 1.07501 0.00  
19 13 3 o 9969.833 3974.233 0.00 1.06398 0.00  
23 3 1 o 80754.13 32302.893 0.00 1.06398 0.00  
18 14 4 o 413376.8 157275.86 180.00 1.06696 0.01  
20 10 6 o 34530.883 13046.674 180.00 1.06696 0.00

Supplementary Material (ESI) for Chemical Science  
This journal is (c) The Royal Society of Chemistry 2010

```
22 6 4 o 200697.73 76457.73 180.00 1.06696 0.00
15 15 9 o 115734.99 28817.621 0.00 1.07197 0.00
20 12 0 o 373.194 135.110 0.00 1.05908 0.00
21 7 7 o 10526.186 4293.823 0.00 1.06398 0.00
17 15 5 o 147136.36 58442.23 0.00 1.06398 0.00
17 11 11 o 12462.910 2616.516 0.00 1.07197 0.00
23 3 3 o 476209.0 208287.22 0.00 1.05617 0.01
20 12 2 o 54944.97 24981.332 0.00 1.05521 0.00
17 13 9 o 131793.69 52807.77 0.00 1.06398 0.00
14 14 12 o 335865.38 131749.86 180.00 1.06696 0.00
22 8 2 o 64753.43 30826.156 180.00 1.05138 0.00
21 9 5 o 49017.35 21356.266 180.00 1.05617 0.00
16 16 6 o 84821.97 38884.14 0.00 1.05521 0.00
19 13 5 o 127512.11 68512.45 180.00 1.04853 0.01
23 5 1 o 157846.56 84313.51 180.00 1.04853 0.01
18 14 6 o 5318.913 2927.855 180.00 1.04759 0.00
16 12 12 o 155081.45 61167.04 0.00 1.05908 0.00
22 6 6 o 349014.72 195080.47 0.00 1.04759 0.01
16 14 10 o 73.110 24.411 0.00 1.05138 0.00
_reflns_number_total          373
_reflns_limit_h_min           1
_reflns_limit_h_max          23
_reflns_limit_k_min           0
_reflns_limit_k_max          16
_reflns_limit_l_min           0
_reflns_limit_l_max          13
_reflns_d_resolution_high      1.048
_reflns_d_resolution_low      14.262
#-eof-eof-eof-eof-eof-eof-eof-eof-eof-eof-eof-eof-eof-#
```

(b)

```
data_DESREV_publ

_pd_block_id
2010-07-26T11:56|DESHR|CEAK|stadip

_audit_creation_method "from EXP file using GSAS2CIF"
_audit_creation_date   2010-07-26T11:56
_audit_author_name     CEAK
_audit_update_record   ; 2010-07-26T11:56 Initial CIF as created by GSAS2CIF
;

_refine_ls_shift/su_max    1.03
_refine_ls_shift/su_mean  0.32
_computing_structure_refinement  GSAS
_refine_ls_number_parameters  45
_refine_ls_goodness_of_fit_all  1.02
_refine_ls_number_restraints  0
_refine_ls_matrix_type      full

_pd_phase_name
"Ru1% NaY desorbed NOx no H2"
_cell_length_a             24.72590(21)
```

**Supplementary Material (ESI) for Chemical Science**  
**This journal is (c) The Royal Society of Chemistry 2010**

```

_cell_length_b          24.7259
_cell_length_c          24.7259
_cell_angle_alpha      90.0
_cell_angle_beta       90.0
_cell_angle_gamma      90.0
_cell_volume            15116.7(4)
_symmetry_cell_setting  cubic
_symmetry_space_group_name_H-M  "F d -3 m"

loop_
  _atom_site_type_symbol
  _atom_site_label
  _atom_site_fract_x
  _atom_site_fract_y
  _atom_site_fract_z
  _atom_site_occupancy
  _atom_site_thermal_displace_type
  _atom_site_U_iso_or_equiv
  _atom_site_symmetry_multiplicity
O
O1  0.89300(16) 0.10700(16) 0.0      1.0      Uiso  0.0059(27) 96
O
O2  0.96719(28) 0.07828(16) 0.07828(16) 1.0      Uiso  0.0111(27) 96
O
O3  0.99997(16) 0.14416(23) 0.99997(16) 1.0      Uiso  0.0012(29) 96
O
O4  0.92931(20) 0.17802(17) 0.07198(17) 1.0      Uiso  0.0029(32) 96
Si
T1  0.94682(10) 0.12453(10) 0.03568(9)  1.0      Uiso  0.0024(5)  192
Na
sii 0.23504(16) 0.23504(16) 0.23504(16) 0.916(12) Uiso  0.017(4)  32
Na
SI' 0.0679(6)  0.0679(6)  0.0679(6)  0.262(9) Uiso  0.010(12) 32
Na
siii 0.375      0.375      0.2105(17) 0.191(18) Uiso  0.021(23) 48
Na
sV  0.5      0.5      0.5      0.237(30) Uiso  0.042(8)  16
Ru
ru  0.0      0.0      0.0      0.0967(34) Uiso  0.026(13) 16
O
ow1 0.3196(8) 0.3196(8) 0.5200(9) 0.244(12) Uiso  0.017(16) 96
O
ow2 0.3086(6) 0.3086(6) 0.2181(8) 0.194(7)  Uiso  0.077(10) 96
O
O14 0.375      0.375      0.6030(29) 0.181(21) Uiso  0.08(4)   48
O
O15 0.375      0.375      0.4628(30) 0.174(14) Uiso  0.10(5)   48

_chemical_formula_sum      "Na0.26 O2.31 Ru0.01 Si"
_chemical_formula_weight   71.89
_cell_formula_units_Z      192

loop_
  _atom_type_symbol
  _atom_type_number_in_cell
  _atom_type_scatter_dispersion_real

```

Supplementary Material (ESI) for Chemical Science  
This journal is (c) The Royal Society of Chemistry 2010

```
_atom_type_scatter_dispersion_imag
_atom_type_scatter_Cromer_Mann_a1
_atom_type_scatter_Cromer_Mann_a2
_atom_type_scatter_Cromer_Mann_a3
_atom_type_scatter_Cromer_Mann_a4
_atom_type_scatter_Cromer_Mann_b1
_atom_type_scatter_Cromer_Mann_b2
_atom_type_scatter_Cromer_Mann_b3
_atom_type_scatter_Cromer_Mann_b4
_atom_type_scatter_Cromer_Mann_c
_atom_type_scatter_source
O      443.167  0.000  0.000
3.04850 13.2771 2.28680 5.70110 1.54630 0.32390 0.86700 32.9089 0.25080
International_Tables_Vol_C
Si     192.0  0.000  0.000
6.29150 2.43860 3.03530 32.3337 1.98910 0.67850 1.54100 81.6937 1.14070
International_Tables_Vol_C
Na     50.631  0.000  0.000
4.76260 3.28500 3.17360 8.84220 1.26740 0.31360 1.11280 129.424 0.67600
International_Tables_Vol_C
Ru     1.547  0.000  0.000
19.2674 0.80852 12.9182 8.43467 4.86337 24.7997 1.56756 94.2928 5.37874
International_Tables_Vol_C
_diffraction_radiation_probe      x-ray
_diffraction_radiation_polarisation_ratio  0.0
_diffraction_radiation_wavelength  1.540562
_diffraction_radiation_type        Cu_K\alpha~1~
_pd_proc_ls_profile_R_factor        0.0444
_pd_proc_ls_profile_wR_factor       0.0606
_pd_proc_ls_profile_wR_expected     0.0598
_refine_ls_R_Fsqd_factor            0.11349

_pd_proc_ls_background_function
; GSAS Background function number 1 with 10 terms.
Shifted Chebyshev function of 1st kind
  1: 148.093  2: -103.222  3: 49.0362  4: -16.3916
  5: 4.92265  6: -16.1140  7: 26.6737  8: -14.4236
  9: 6.88823 10: 1.34373
;

_pd_spec_mounting
;sealed glass capillary .7mm outer diameter packing density 40%
;
_pd_spec_mount_mode      'transmission'
_pd_spec_shape           'cylinder'
_exptl_absorpt_process_details
; GSAS Absorption/surface roughness correction: function number 0
Debye-Scherrer absorption correction
Term (= MU.r/wave) = 1.7234
Correction is not refined.
;
_exptl_absorpt_correction_T_min  0.02124
_exptl_absorpt_correction_T_max  0.07318

_pd_proc_ls_profile_function
;
```

Supplementary Material (ESI) for Chemical Science  
This journal is (c) The Royal Society of Chemistry 2010

CW Profile function number 3 with 19 terms  
Pseudovoigt profile coefficients as parameterized in  
P. Thompson, D.E. Cox & J.B. Hastings (1987). J. Appl. Cryst.,20,79-83.  
Asymmetry correction of L.W. Finger, D.E. Cox & A. P. Jephcoat (1994).  
J. Appl. Cryst.,27,892-900.  
#1(GU) = 0.000 #2(GV) = -1.448 #3(GW) = 3.938  
#4(GP) = 0.002 #5(LX) = 1.436 #6(LY) = 0.195  
#7(S/L) = 0.0325 #8(H/L) = 0.0180  
#9(trns) = 0.00 #10(shft)= 0.0000  
#11(stec)= 0.00 #12(ptec)= 0.00 #13(sfec)= 0.00  
#14(L11) = 0.063 #15(L22) = 0.064 #16(L33) = 0.019  
#17(L12) = 0.007 #18(L13) = 0.000 #19(L23) = 0.003  
Peak tails are ignored where the intensity is below 0.0010 times the peak  
Aniso. broadening axis 0.0 0.0 1.0  
;  
\_pd\_proc\_ls\_peak\_cutoff 0.00100  
\_pd\_proc\_info\_datetime 2010-07-26T11:56:11  
\_pd\_calc\_method "Rietveld Refinement"  
  
\_pd\_meas\_2theta\_range\_min 3.0  
\_pd\_meas\_2theta\_range\_max 94.99  
\_pd\_meas\_2theta\_range\_inc 0.01  
\_pd\_proc\_2theta\_range\_min 2.99179  
\_pd\_proc\_2theta\_range\_max 94.9818  
\_pd\_proc\_2theta\_range\_inc 0.01  
  
loop\_  
\_refln\_index\_h  
\_refln\_index\_k  
\_refln\_index\_l  
\_refln\_observed\_status  
\_refln\_F\_squared\_meas  
\_refln\_F\_squared\_calc  
\_refln\_phase\_calc  
\_refln\_d\_spacing  
\_gsas\_i100\_meas  
1 1 1 o 1794474.6 1781148.6 180.00 14.27553 100.00  
2 2 0 o 457061.5 454049.3 0.00 8.74194 14.45  
3 1 1 o 254877.70 251366.73 0.00 7.45515 11.78  
2 2 2 o 86607.31 65151.80 180.00 7.13777 1.22  
4 0 0 o 6486.916 5957.100 0.00 6.18149 0.05  
3 3 1 o 609491.4 638402.6 180.00 5.67252 16.57  
4 2 2 o 10695.398 6001.079 180.00 5.04716 0.23  
5 1 1 o 132770.45 120558.19 0.00 4.75851 2.58  
3 3 3 o 152188.48 138599.97 0.00 4.75851 0.98  
4 4 0 o 380291.1 374563.7 180.00 4.37097 3.12  
5 3 1 o 11651.406 13778.230 0.00 4.17945 0.35  
4 4 2 o 19336.451 15354.152 180.00 4.12099 0.28  
6 2 0 o 127398.81 119188.40 0.00 3.90952 1.69  
5 3 3 o 808412.9 807097.4 180.00 3.77067 9.95  
6 2 2 o 24433.246 24196.420 180.00 3.72758 0.30  
4 4 4 o 564.164 378.070 0.00 3.56888 0.00  
5 5 1 o 62249.29 57746.86 0.00 3.46233 0.65  
7 1 1 o 3234.019 3010.740 180.00 3.46233 0.03  
6 4 2 o 386291.9 373666.7 180.00 3.30414 7.32  
5 5 3 o 307.299 227.236 180.00 3.21904 0.00

Supplementary Material (ESI) for Chemical Science  
This journal is (c) The Royal Society of Chemistry 2010

|    |   |   |   |           |           |        |         |      |
|----|---|---|---|-----------|-----------|--------|---------|------|
| 7  | 3 | 1 | o | 10998.896 | 8215.928  | 0.00   | 3.21904 | 0.20 |
| 8  | 0 | 0 | o | 41782.89  | 36753.22  | 0.00   | 3.09074 | 0.08 |
| 7  | 3 | 3 | o | 118821.44 | 118208.51 | 180.00 | 3.02076 | 0.95 |
| 6  | 4 | 4 | o | 1205.160  | 1127.315  | 180.00 | 2.99846 | 0.01 |
| 6  | 6 | 0 | o | 561565.7  | 556853.2  | 0.00   | 2.91398 | 2.08 |
| 8  | 2 | 2 | o | 138612.33 | 138104.13 | 0.00   | 2.91398 | 1.04 |
| 7  | 5 | 1 | o | 60962.93  | 59458.11  | 0.00   | 2.85511 | 0.86 |
| 5  | 5 | 5 | o | 2724553.8 | 2752775.3 | 180.00 | 2.85511 | 6.44 |
| 6  | 6 | 2 | o | 878.839   | 946.972   | 180.00 | 2.83626 | 0.01 |
| 8  | 4 | 0 | o | 408479.2  | 396755.1  | 0.00   | 2.76445 | 2.72 |
| 9  | 1 | 1 | o | 7092.707  | 6876.389  | 180.00 | 2.71403 | 0.04 |
| 7  | 5 | 3 | o | 111742.07 | 108192.84 | 0.00   | 2.71403 | 1.42 |
| 8  | 4 | 2 | o | 41495.60  | 42263.93  | 0.00   | 2.69782 | 0.51 |
| 6  | 6 | 4 | o | 631800.7  | 610932.2  | 180.00 | 2.63579 | 3.83 |
| 9  | 3 | 1 | o | 203393.19 | 201408.83 | 0.00   | 2.59198 | 2.37 |
| 8  | 4 | 4 | o | 194596.13 | 182522.64 | 0.00   | 2.52358 | 1.08 |
| 9  | 3 | 3 | o | 3.244     | 3.493     | 180.00 | 2.48505 | 0.00 |
| 7  | 7 | 1 | o | 959.373   | 990.941   | 180.00 | 2.48505 | 0.01 |
| 7  | 5 | 5 | o | 56168.47  | 58508.15  | 180.00 | 2.48505 | 0.32 |
| 8  | 6 | 2 | o | 4321.663  | 3616.721  | 0.00   | 2.42458 | 0.05 |
| 10 | 2 | 0 | o | 10773.963 | 9419.001  | 0.00   | 2.42458 | 0.05 |
| 9  | 5 | 1 | o | 3288.089  | 2957.728  | 180.00 | 2.39035 | 0.03 |
| 7  | 7 | 3 | o | 61740.97  | 54767.75  | 0.00   | 2.39035 | 0.31 |
| 10 | 2 | 2 | o | 19494.648 | 18412.025 | 180.00 | 2.37926 | 0.09 |
| 6  | 6 | 6 | o | 1106368.6 | 1052873.9 | 0.00   | 2.37926 | 1.72 |
| 9  | 5 | 3 | o | 632.480   | 684.372   | 0.00   | 2.30571 | 0.01 |
| 8  | 6 | 4 | o | 9720.134  | 11087.825 | 180.00 | 2.29575 | 0.08 |
| 10 | 4 | 2 | o | 57.070    | 51.145    | 0.00   | 2.25716 | 0.00 |
| 11 | 1 | 1 | o | 169162.31 | 162764.03 | 180.00 | 2.22946 | 0.72 |
| 7  | 7 | 5 | o | 141453.13 | 136473.22 | 0.00   | 2.22946 | 0.58 |
| 8  | 8 | 0 | o | 758913.8  | 751917.1  | 0.00   | 2.18549 | 1.43 |
| 11 | 3 | 1 | o | 43904.59  | 44986.38  | 180.00 | 2.16032 | 0.34 |
| 9  | 7 | 1 | o | 32829.555 | 33541.445 | 0.00   | 2.16032 | 0.24 |
| 8  | 8 | 2 | o | 1223.750  | 1152.545  | 180.00 | 2.15212 | 0.00 |
| 10 | 4 | 4 | o | 52341.29  | 49098.91  | 0.00   | 2.15212 | 0.19 |
| 9  | 5 | 5 | o | 48606.88  | 49946.82  | 180.00 | 2.16032 | 0.19 |
| 10 | 6 | 0 | o | 51947.61  | 46831.14  | 0.00   | 2.12023 | 0.20 |
| 8  | 6 | 6 | o | 454.619   | 404.585   | 0.00   | 2.12023 | 0.00 |
| 11 | 3 | 3 | o | 376379.0  | 362175.4  | 0.00   | 2.09723 | 1.28 |
| 9  | 7 | 3 | o | 72010.23  | 69104.04  | 180.00 | 2.09723 | 0.51 |
| 10 | 6 | 2 | o | 64396.45  | 61245.00  | 180.00 | 2.08972 | 0.44 |
| 12 | 0 | 0 | o | 336194.31 | 312159.34 | 180.00 | 2.06050 | 0.30 |
| 8  | 8 | 4 | o | 121725.68 | 113259.90 | 180.00 | 2.06050 | 0.42 |
| 11 | 5 | 1 | o | 4477.294  | 3664.092  | 0.00   | 2.03936 | 0.03 |
| 7  | 7 | 7 | o | 136527.89 | 115840.77 | 0.00   | 2.03936 | 0.15 |
| 12 | 2 | 2 | o | 5638.066  | 3534.009  | 0.00   | 2.00554 | 0.02 |
| 10 | 6 | 4 | o | 173.785   | 101.732   | 0.00   | 2.00554 | 0.00 |
| 11 | 5 | 3 | o | 2943.781  | 2339.571  | 0.00   | 1.98604 | 0.02 |
| 9  | 7 | 5 | o | 25069.404 | 19978.078 | 180.00 | 1.98604 | 0.16 |
| 12 | 4 | 0 | o | 8757.883  | 6835.030  | 0.00   | 1.95476 | 0.03 |
| 9  | 9 | 1 | o | 48279.93  | 45296.62  | 180.00 | 1.93669 | 0.13 |
| 12 | 4 | 2 | o | 97919.20  | 91637.00  | 0.00   | 1.93077 | 0.54 |
| 8  | 8 | 6 | o | 154213.39 | 144477.41 | 0.00   | 1.93077 | 0.43 |
| 10 | 8 | 2 | o | 200429.92 | 197482.97 | 0.00   | 1.90765 | 1.11 |
| 11 | 7 | 1 | o | 1237.303  | 1152.245  | 0.00   | 1.89084 | 0.01 |
| 13 | 1 | 1 | o | 42422.84  | 39246.10  | 180.00 | 1.89084 | 0.11 |

Supplementary Material (ESI) for Chemical Science  
This journal is (c) The Royal Society of Chemistry 2010

9 9 3 o 38344.04 35315.48 0.00 1.89084 0.10  
11 5 5 o 122.273 92.197 0.00 1.89084 0.00  
10 6 6 o 9607.492 8439.593 180.00 1.88534 0.03  
12 4 4 o 34470.133 35323.72 0.00 1.86379 0.09  
11 7 3 o 74051.99 68405.13 0.00 1.84810 0.37  
13 3 1 o 14981.793 13784.277 180.00 1.84810 0.08  
10 8 4 o 219.442 199.625 180.00 1.84296 0.00  
9 7 7 o 102800.97 94954.18 0.00 1.84810 0.26  
12 6 2 o 42732.95 43601.49 180.00 1.82282 0.21  
9 9 5 o 203756.55 199889.98 0.00 1.80814 0.47  
13 3 3 o 21774.100 21354.010 0.00 1.80814 0.05  
13 5 1 o 112962.34 111098.02 180.00 1.77066 0.49  
8 8 8 o 252939.66 231705.06 0.00 1.78444 0.19  
11 7 5 o 117095.90 115163.31 180.00 1.77066 0.51  
12 6 4 o 3840.611 3748.686 180.00 1.76614 0.02  
10 10 0 o 1186337.9 1219962.6 180.00 1.74839 1.24  
14 2 0 o 156259.84 160750.86 180.00 1.74839 0.33  
11 9 1 o 2024.102 2230.506 180.00 1.73542 0.01  
13 5 3 o 231.609 245.195 0.00 1.73542 0.00  
10 8 6 o 9888.354 10168.797 0.00 1.74839 0.04  
10 10 2 o 45676.39 53367.41 180.00 1.73116 0.09  
14 2 2 o 973.882 1155.427 180.00 1.73116 0.00  
12 8 0 o 36852.38 36692.40 0.00 1.71444 0.07  
11 9 3 o 501166.7 494675.6 180.00 1.70220 1.89  
12 8 2 o 13088.890 12779.273 180.00 1.69819 0.05  
9 9 7 o 16810.318 16560.912 0.00 1.70220 0.03  
10 10 4 o 57274.99 58236.26 180.00 1.68239 0.10  
14 4 2 o 28788.221 29267.375 180.00 1.68239 0.11  
13 7 1 o 9532.213 10620.989 0.00 1.67082 0.03  
13 5 5 o 41837.66 46765.98 180.00 1.67082 0.07  
12 6 6 o 38010.90 38646.25 180.00 1.68239 0.07  
11 7 7 o 38274.44 43045.75 180.00 1.67082 0.07  
12 8 4 o 77096.27 81139.45 180.00 1.65207 0.27  
15 1 1 o 36810.55 40857.92 180.00 1.64112 0.06  
11 9 5 o 7407.931 8208.342 0.00 1.64112 0.02  
13 7 3 o 49370.54 54636.99 0.00 1.64112 0.16  
14 4 4 o 598.600 631.971 0.00 1.63752 0.00  
14 6 0 o 592.159 589.202 180.00 1.62334 0.00  
10 8 8 o 18774.477 19901.682 0.00 1.63752 0.03  
15 3 1 o 248.229 241.980 0.00 1.61294 0.00  
14 6 2 o 144409.70 140435.14 0.00 1.60952 0.43  
10 10 6 o 26167.838 25420.885 180.00 1.60952 0.04  
11 11 1 o 588554.0 593161.5 0.00 1.58617 0.86  
15 3 3 o 81880.30 82450.77 180.00 1.58617 0.12  
13 7 5 o 28842.135 29044.510 0.00 1.58617 0.08  
12 8 6 o 16587.229 16718.281 0.00 1.58292 0.05  
14 6 4 o 48350.49 48531.30 0.00 1.57010 0.14  
12 10 2 o 3586.154 3596.512 180.00 1.57010 0.01  
9 9 9 o 3505.911 3527.594 0.00 1.58617 0.00  
13 9 1 o 45686.09 43072.26 180.00 1.56069 0.13  
15 5 1 o 7999.591 7550.922 0.00 1.56069 0.02  
11 11 3 o 3165.579 2990.471 0.00 1.56069 0.00  
11 9 7 o 65596.88 61795.19 0.00 1.56069 0.17  
16 0 0 o 828674.4 814427.1 0.00 1.54537 0.26  
15 5 3 o 123319.96 108394.67 0.00 1.53640 0.31  
13 9 3 o 26594.984 23345.039 180.00 1.53640 0.07

Supplementary Material (ESI) for Chemical Science  
This journal is (c) The Royal Society of Chemistry 2010

12 10 4 o 4309.573 3831.480 0.00 1.53344 0.01  
16 2 2 o 374.609 381.058 0.00 1.52178 0.00  
14 8 2 o 38776.82 39598.82 180.00 1.52178 0.09  
11 11 5 o 521878.9 505446.1 180.00 1.51320 0.60  
10 10 8 o 169704.39 174175.30 0.00 1.52178 0.20  
14 6 6 o 2920.200 2822.915 0.00 1.51038 0.00  
13 7 7 o 11.518 10.844 180.00 1.51320 0.00  
15 7 1 o 50945.56 46716.03 180.00 1.49103 0.11  
16 4 0 o 77333.20 73096.81 0.00 1.49923 0.09  
15 5 5 o 81614.59 74580.16 180.00 1.49103 0.09  
13 9 5 o 57388.65 52492.48 180.00 1.49103 0.13  
12 8 8 o 494254.4 467618.4 0.00 1.49923 0.55  
16 4 2 o 14206.404 13359.854 180.00 1.48833 0.03  
14 8 4 o 860.164 808.885 180.00 1.48833 0.00  
15 7 3 o 23461.477 22698.574 0.00 1.46981 0.05  
12 10 6 o 317551.19 311734.72 180.00 1.47766 0.65  
12 12 0 o 1702925.6 1711386.8 0.00 1.45699 0.82  
11 9 9 o 68896.24 66573.21 0.00 1.46981 0.07  
17 1 1 o 221510.78 233166.20 180.00 1.44946 0.21  
13 11 1 o 67641.84 71096.18 0.00 1.44946 0.13  
16 4 4 o 9799.470 9833.723 180.00 1.45699 0.01  
12 12 2 o 18944.119 19983.646 0.00 1.44698 0.02  
11 11 7 o 56.778 60.883 180.00 1.44946 0.00  
16 6 2 o 11132.253 10918.330 0.00 1.43717 0.02  
14 10 0 o 112276.38 110230.02 180.00 1.43717 0.10  
13 11 3 o 41338.06 39674.39 0.00 1.42994 0.07  
17 3 1 o 1671.741 1600.563 180.00 1.42994 0.00  
15 7 5 o 659.896 632.941 180.00 1.42994 0.00  
14 8 6 o 293877.91 287957.34 180.00 1.43717 0.52  
14 10 2 o 7932.486 7758.830 180.00 1.42755 0.01  
13 9 7 o 226.950 218.773 0.00 1.42994 0.00  
12 12 4 o 3511.321 3898.905 0.00 1.41813 0.00  
17 3 3 o 5496.913 5595.740 180.00 1.41118 0.00  
15 9 1 o 8014.131 8246.719 180.00 1.41118 0.01  
10 10 10 o 520.717 504.211 0.00 1.42755 0.00  
16 6 4 o 1769.401 1887.700 180.00 1.40889 0.00  
12 10 8 o 2027.416 2160.596 180.00 1.40889 0.00  
14 10 4 o 566.210 669.058 0.00 1.39983 0.00  
15 9 3 o 6578.887 7159.144 180.00 1.39315 0.01  
17 5 1 o 46011.93 49945.43 180.00 1.39315 0.07  
13 11 5 o 518.987 572.082 180.00 1.39315 0.00  
16 8 0 o 12251.143 14311.442 180.00 1.38222 0.01  
16 8 2 o 108279.13 117963.30 0.00 1.37366 0.14  
15 7 7 o 24805.799 27626.908 180.00 1.37579 0.02  
17 5 3 o 3035.906 3380.308 0.00 1.37579 0.00  
12 12 6 o 103352.05 112593.96 0.00 1.37366 0.07  
11 11 9 o 9937.942 11127.765 0.00 1.37579 0.01  
18 2 2 o 17789.557 18650.688 180.00 1.35701 0.01  
14 8 8 o 845.819 919.935 180.00 1.37366 0.00  
18 2 0 o 12364.775 12651.846 180.00 1.36526 0.01  
16 6 6 o 1486288.9 1520859.3 0.00 1.36526 0.94  
15 9 5 o 118226.71 122162.86 180.00 1.35906 0.14  
16 8 4 o 104162.00 117671.38 180.00 1.34891 0.12  
14 10 6 o 944.741 989.827 0.00 1.35701 0.00  
17 7 1 o 348.555 364.948 0.00 1.34293 0.00  
13 13 1 o 19576.393 20738.852 0.00 1.34293 0.01



Supplementary Material (ESI) for Chemical Science  
This journal is (c) The Royal Society of Chemistry 2010

13 9 9 o 286605.66 295429.28 180.00 1.35906 0.17  
17 5 5 o 784554.1 832402.6 0.00 1.34293 0.44  
13 11 7 o 18067.500 19119.020 0.00 1.34293 0.02  
14 12 2 o 191727.59 174662.34 0.00 1.33313 0.20  
18 4 2 o 7168.609 6463.324 0.00 1.33313 0.01  
17 7 3 o 2293.484 2199.205 0.00 1.32736 0.00  
13 13 3 o 223276.27 213201.53 0.00 1.32736 0.11  
15 11 1 o 2463.248 2350.999 0.00 1.32736 0.00  
12 10 10 o 131500.53 118121.41 0.00 1.33313 0.07  
15 11 3 o 178333.75 166925.61 0.00 1.31232 0.16  
16 8 6 o 1240.612 1179.504 0.00 1.31047 0.00  
18 4 4 o 6116.802 5826.751 180.00 1.31047 0.00  
14 12 4 o 46107.16 43929.48 0.00 1.31047 0.04  
12 12 8 o 14982.764 15656.877 180.00 1.31790 0.01  
15 9 7 o 66749.55 62189.97 0.00 1.31232 0.06  
18 6 0 o 99471.66 93106.42 180.00 1.30317 0.04  
16 10 2 o 30140.822 28266.037 180.00 1.30317 0.03  
13 13 5 o 19683.123 19049.277 180.00 1.29778 0.01  
17 7 5 o 264442.63 255109.38 0.00 1.29778 0.22  
19 1 1 o 23332.027 22513.346 0.00 1.29778 0.01  
18 6 2 o 59.935 58.835 0.00 1.29599 0.00  
14 10 8 o 121891.67 113857.50 180.00 1.30317 0.10  
17 9 1 o 54144.34 50686.28 180.00 1.28371 0.04  
11 11 11 o 2163811.8 2084664.4 0.00 1.29778 0.29  
15 11 5 o 8299.491 7735.267 180.00 1.28371 0.01  
19 3 1 o 62091.47 57992.21 180.00 1.28371 0.05  
16 10 4 o 719.605 674.904 0.00 1.28198 0.00  
17 9 3 o 326337.69 263232.50 180.00 1.27009 0.21  
13 11 9 o 86082.66 80309.21 180.00 1.28371 0.06  
14 12 6 o 8439.897 7236.394 0.00 1.27514 0.01  
18 6 4 o 39612.22 33808.477 0.00 1.27514 0.03  
19 3 3 o 76668.57 61447.53 0.00 1.27009 0.02  
19 5 1 o 369.765 344.176 180.00 1.25689 0.00  
16 8 8 o 356204.5 300457.81 0.00 1.26179 0.11  
15 9 9 o 2915.992 2738.802 180.00 1.25689 0.00  
13 13 7 o 37929.34 35603.73 0.00 1.25689 0.01  
17 7 7 o 2795.377 2596.885 180.00 1.25689 0.00  
18 8 2 o 105413.38 92817.29 180.00 1.24885 0.06  
16 10 6 o 49282.13 43362.96 180.00 1.24885 0.03  
14 14 0 o 56654.85 49693.52 0.00 1.24885 0.01  
12 12 10 o 11889.725 11589.223 0.00 1.25527 0.00  
19 5 3 o 329660.38 285074.84 180.00 1.24410 0.16  
17 9 5 o 3230.557 2788.012 0.00 1.24410 0.00  
15 13 1 o 21562.121 18695.521 0.00 1.24410 0.01  
14 14 2 o 16089.408 14578.457 0.00 1.24253 0.00  
15 11 7 o 56463.73 48718.56 180.00 1.24410 0.03  
16 12 0 o 48021.30 48337.83 180.00 1.23630 0.01  
20 0 0 o 44953.63 45126.56 180.00 1.23630 0.00  
14 10 10 o 26974.363 24356.494 180.00 1.24253 0.01  
18 6 6 o 7325.387 6631.727 0.00 1.24253 0.00  
15 13 3 o 9892.671 11042.923 0.00 1.23169 0.00  
16 12 2 o 28239.414 31442.049 0.00 1.23016 0.01  
18 8 4 o 26011.502 28977.229 180.00 1.23016 0.01  
17 11 1 o 69744.89 62441.22 180.00 1.21964 0.03  
14 14 4 o 9663.604 8972.976 0.00 1.22412 0.00  
20 2 2 o 110663.41 102811.86 180.00 1.22412 0.02

Supplementary Material (ESI) for Chemical Science  
This journal is (c) The Royal Society of Chemistry 2010

14 12 8 o 11469.672 12803.827 180.00 1.23016 0.00  
19 5 5 o 8412.190 7498.158 0.00 1.21964 0.00  
19 7 1 o 50445.38 45183.18 0.00 1.21964 0.02  
17 11 3 o 598.532 515.802 180.00 1.20794 0.00  
13 11 11 o 61326.18 54117.60 180.00 1.21964 0.01  
16 12 4 o 61296.66 58406.04 180.00 1.21229 0.02  
20 4 0 o 26005.674 24757.482 180.00 1.21229 0.00  
19 7 3 o 53266.30 45769.63 180.00 1.20794 0.02  
15 13 5 o 131665.13 113750.61 0.00 1.20794 0.04  
17 9 7 o 145044.69 124452.72 0.00 1.20794 0.05  
13 13 9 o 3508.942 2935.886 0.00 1.20794 0.00  
18 10 0 o 13716.390 14609.286 180.00 1.20080 0.00  
20 4 2 o 4067.628 3687.606 0.00 1.20650 0.00  
16 10 8 o 5609.600 5081.979 0.00 1.20650 0.00  
14 14 6 o 717458.1 600475.3 0.00 1.19517 0.09  
18 10 2 o 1692.234 1410.024 180.00 1.19517 0.00  
18 8 6 o 316.377 342.785 0.00 1.20080 0.00  
15 11 9 o 11982.727 10181.641 0.00 1.19657 0.00  
17 11 5 o 481456.3 401733.6 180.00 1.18552 0.11  
16 12 6 o 8304.665 7232.072 180.00 1.18416 0.00  
20 4 4 o 170395.98 138994.92 180.00 1.18963 0.02  
19 7 5 o 6910.327 5753.706 0.00 1.18552 0.00  
20 6 2 o 231670.45 177855.14 180.00 1.17876 0.05  
18 10 4 o 17542.842 13491.915 180.00 1.17876 0.00  
12 12 12 o 935422.4 759426.0 180.00 1.18963 0.04  
21 1 1 o 53561.55 45058.85 0.00 1.17477 0.00  
15 13 7 o 922.944 799.577 0.00 1.17477 0.00  
19 9 1 o 127686.20 108635.30 0.00 1.17477 0.02  
14 12 10 o 44508.61 33706.738 0.00 1.17876 0.01  
15 15 1 o 3108.938 3447.409 180.00 1.16430 0.00  
16 14 2 o 93502.11 64313.80 0.00 1.15790 0.01  
21 3 1 o 18419.744 20376.738 180.00 1.16430 0.00  
19 9 3 o 36.502 40.519 180.00 1.16430 0.00  
20 6 4 o 45466.36 45706.36 0.00 1.16301 0.01  
17 13 1 o 8158.478 5374.149 0.00 1.15411 0.00  
15 15 3 o 176652.67 118883.35 0.00 1.15411 0.01  
17 9 9 o 49265.88 53744.16 180.00 1.16430 0.00  
14 14 8 o 27850.945 18713.785 180.00 1.15790 0.00  
18 8 8 o 29340.805 29082.957 0.00 1.16301 0.00  
17 11 7 o 83024.19 55410.83 0.00 1.15411 0.01  
19 7 7 o 31330.494 20718.205 0.00 1.15411 0.00  
21 3 3 o 108062.04 72260.70 0.00 1.15411 0.01  
18 10 6 o 5476.376 3904.839 180.00 1.15285 0.00  
16 10 10 o 22189.854 14602.146 180.00 1.15790 0.00  
17 13 3 o 9132.994 8235.295 0.00 1.14418 0.00  
16 14 4 o 4438.928 4994.696 0.00 1.14296 0.00  
13 13 11 o 717.233 478.039 180.00 1.15411 0.00  
20 8 0 o 1679206.6 1085616.3 0.00 1.14787 0.07  
16 12 8 o 6874.340 4363.304 0.00 1.14787 0.00  
18 12 2 o 327.419 2714.001 0.00 1.13810 0.00  
19 9 5 o 2748.420 2495.057 180.00 1.14418 0.00  
21 5 1 o 76199.70 68238.70 180.00 1.14418 0.01  
20 8 2 o 19.543 22.440 0.00 1.14296 0.00  
15 15 5 o -803.891 40038.31 0.00 1.13450 0.00  
15 11 11 o 11700.014 10298.015 0.00 1.14418 0.00  
20 6 6 o 3490.686 38361.32 0.00 1.13810 0.00

Supplementary Material (ESI) for Chemical Science  
This journal is (c) The Royal Society of Chemistry 2010

|    |    |      |           |           |        |         |      |
|----|----|------|-----------|-----------|--------|---------|------|
| 20 | 8  | 4 o  | 3498.571  | 27004.209 | 0.00   | 1.12858 | 0.00 |
| 15 | 13 | 9 o  | -16.378   | 341.701   | 180.00 | 1.13450 | 0.00 |
| 21 | 5  | 3 o  | -62.530   | 126.307   | 180.00 | 1.13450 | 0.00 |
| 19 | 11 | 1 o  | -1258.680 | 16788.316 | 180.00 | 1.12507 | 0.00 |
| 17 | 13 | 5 o  | -597.789  | 15054.224 | 180.00 | 1.12507 | 0.00 |
| 18 | 12 | 4 o  | -0.080    | 0.162     | 0.00   | 1.12391 | 0.00 |
| 16 | 14 | 6 o  | 22197.105 | 26753.484 | 180.00 | 1.11929 | 0.00 |
| 22 | 2  | 0 o  | 50663.88  | 58115.84  | 0.00   | 1.11929 | 0.00 |
| 21 | 7  | 1 o  | -368.948  | 8553.765  | 0.00   | 1.11587 | 0.00 |
| 21 | 5  | 5 o  | -741.721  | 14937.479 | 180.00 | 1.11587 | 0.00 |
| 19 | 11 | 3 o  | -63.792   | 58.150    | 0.00   | 1.11587 | 0.00 |
| 22 | 2  | 2 o  | -287.174  | 9426.469  | 0.00   | 1.11473 | 0.00 |
| 18 | 10 | 8 o  | 12799.911 | 14425.771 | 180.00 | 1.11929 | 0.00 |
| 14 | 12 | 12 o | -14.056   | 844.357   | 180.00 | 1.12391 | 0.00 |
| 17 | 11 | 9 o  | -1197.173 | 15363.178 | 180.00 | 1.11587 | 0.00 |
| 19 | 9  | 7 o  | -607.341  | 4013.930  | 180.00 | 1.11587 | 0.00 |
| 14 | 14 | 10 o | -28.140   | 106.327   | 180.00 | 1.11473 | 0.00 |
| 15 | 15 | 7 o  | 40299.06  | 18202.596 | 180.00 | 1.10689 | 0.00 |
| 21 | 7  | 3 o  | 180554.30 | 82842.53  | 0.00   | 1.10689 | 0.00 |
| 20 | 8  | 6 o  | 425.791   | 118.075   | 0.00   | 1.10578 | 0.00 |
| 18 | 12 | 6 o  | 681185.0  | 63963.92  | 0.00   | 1.10138 | 0.00 |
| 20 | 10 | 2 o  | 1230333.8 | 116057.70 | 180.00 | 1.10138 | 0.01 |
| 22 | 4  | 2 o  | 688073.4  | 63884.79  | 0.00   | 1.10138 | 0.00 |
| 16 | 12 | 10 o | 9815.265  | 3033.605  | 180.00 | 1.10578 | 0.00 |
| 16 | 16 | 0 o  | 82371.39  | 80040.11  | 180.00 | 1.09274 | 0.00 |
| 19 | 11 | 5 o  | 45258.73  | 11820.634 | 0.00   | 1.09812 | 0.00 |
| 17 | 13 | 7 o  | 265.571   | 51.817    | 180.00 | 1.09812 | 0.00 |
| 17 | 15 | 1 o  | 1709.729  | 321.645   | 0.00   | 1.08956 | 0.00 |
| 16 | 16 | 2 o  | 73093.09  | 8630.947  | 0.00   | 1.08850 | 0.00 |
| 22 | 6  | 0 o  | 8766049.  | 355220.4  | 180.00 | 1.08430 | 0.00 |
| 18 | 14 | 0 o  | 834721.6  | 34280.059 | 180.00 | 1.08430 | 0.00 |
| 21 | 7  | 5 o  | 5381.241  | 962.286   | 0.00   | 1.08956 | 0.00 |
| 16 | 14 | 8 o  | 173372.80 | 21407.588 | 0.00   | 1.08850 | 0.00 |
| 22 | 4  | 4 o  | 47698.55  | 5979.986  | 0.00   | 1.08850 | 0.00 |
| 20 | 10 | 4 o  | 227.413   | 29.743    | 180.00 | 1.08850 | 0.00 |
| 13 | 13 | 13 o | 297302.22 | 81219.16  | 180.00 | 1.09812 | 0.00 |
| 21 | 9  | 1 o  | 1995581.5 | 149194.86 | 180.00 | 1.08119 | 0.00 |
| 17 | 15 | 3 o  | 1875438.3 | 139385.72 | 180.00 | 1.08119 | 0.00 |
| 22 | 6  | 2 o  | 42341.79  | 4235.038  | 0.00   | 1.08016 | 0.00 |
| 18 | 14 | 2 o  | 9776.321  | 940.382   | 180.00 | 1.08016 | 0.00 |
| 15 | 13 | 11 o | 16395.539 | 2847.554  | 180.00 | 1.08956 | 0.00 |
| 16 | 16 | 4 o  | 433060.5  | 59735.41  | 0.00   | 1.07606 | 0.00 |
| 19 | 9  | 9 o  | 284.210   | 15.475    | 180.00 | 1.08119 | 0.00 |
| 23 | 1  | 1 o  | 1696311.8 | 195680.28 | 0.00   | 1.07301 | 0.01 |
| 19 | 13 | 1 o  | 561354.6  | 65903.45  | 180.00 | 1.07301 | 0.00 |
| 21 | 9  | 3 o  | 139849.14 | 15861.530 | 180.00 | 1.07301 | 0.00 |
| 20 | 8  | 8 o  | 39196.54  | 5444.754  | 180.00 | 1.07606 | 0.00 |
| 18 | 10 | 10 o | 2646.611  | 261.264   | 0.00   | 1.08016 | 0.00 |
| 18 | 14 | 4 o  | 919977.4  | 139005.44 | 180.00 | 1.06800 | 0.01 |
| 20 | 10 | 6 o  | 154549.44 | 22925.746 | 180.00 | 1.06800 | 0.00 |
| 22 | 6  | 4 o  | 604165.7  | 90924.74  | 180.00 | 1.06800 | 0.01 |
| 15 | 15 | 9 o  | 256855.95 | 29540.145 | 0.00   | 1.07301 | 0.00 |
| 19 | 11 | 7 o  | 93140.04  | 10415.630 | 0.00   | 1.07301 | 0.00 |
| 18 | 12 | 8 o  | 21953.627 | 2912.239  | 0.00   | 1.07201 | 0.00 |
| 17 | 15 | 5 o  | 378714.1  | 86357.46  | 0.00   | 1.06502 | 0.01 |
| 23 | 3  | 1 o  | 160403.17 | 37078.34  | 0.00   | 1.06502 | 0.00 |

Supplementary Material (ESI) for Chemical Science  
This journal is (c) The Royal Society of Chemistry 2010

|                           |    |    |   |           |           |        |         |      |
|---------------------------|----|----|---|-----------|-----------|--------|---------|------|
| 19                        | 13 | 3  | o | 19678.893 | 4532.001  | 0.00   | 1.06502 | 0.00 |
| 17                        | 11 | 11 | o | 44726.47  | 4405.381  | 0.00   | 1.07301 | 0.00 |
| 20                        | 12 | 0  | o | 24.446    | 0.671     | 180.00 | 1.06012 | 0.00 |
| 21                        | 7  | 7  | o | 60234.99  | 14003.844 | 0.00   | 1.06502 | 0.00 |
| 17                        | 13 | 9  | o | 246220.78 | 56211.24  | 0.00   | 1.06502 | 0.00 |
| 14                        | 14 | 12 | o | 675854.8  | 98658.60  | 180.00 | 1.06800 | 0.00 |
| 23                        | 3  | 3  | o | 581444.8  | 218985.36 | 0.00   | 1.05721 | 0.01 |
| 21                        | 9  | 5  | o | 116690.50 | 43935.98  | 180.00 | 1.05721 | 0.00 |
| 16                        | 16 | 6  | o | 80596.80  | 36324.39  | 0.00   | 1.05624 | 0.00 |
| 20                        | 12 | 2  | o | 6183.032  | 2744.461  | 0.00   | 1.05624 | 0.00 |
| 22                        | 8  | 2  | o | 59634.77  | 36488.45  | 180.00 | 1.05241 | 0.00 |
| 16                        | 12 | 12 | o | 131955.25 | 56027.30  | 0.00   | 1.06012 | 0.00 |
| 23                        | 5  | 1  | o | 126221.73 | 80398.55  | 180.00 | 1.04956 | 0.01 |
| 19                        | 13 | 5  | o | 64469.40  | 41115.32  | 180.00 | 1.04956 | 0.00 |
| 22                        | 6  | 6  | o | 213378.86 | 179758.97 | 0.00   | 1.04861 | 0.01 |
| 18                        | 14 | 6  | o | 10154.902 | 8459.910  | 180.00 | 1.04861 | 0.00 |
| 16                        | 14 | 10 | o | 774.459   | 510.503   | 180.00 | 1.05241 | 0.00 |
| _reflns_number_total      |    |    |   |           | 373       |        |         |      |
| _reflns_limit_h_min       |    |    |   |           | 1         |        |         |      |
| _reflns_limit_h_max       |    |    |   |           | 23        |        |         |      |
| _reflns_limit_k_min       |    |    |   |           | 0         |        |         |      |
| _reflns_limit_k_max       |    |    |   |           | 16        |        |         |      |
| _reflns_limit_l_min       |    |    |   |           | 0         |        |         |      |
| _reflns_limit_l_max       |    |    |   |           | 13        |        |         |      |
| _reflns_d_resolution_high |    |    |   |           | 1.049     |        |         |      |
| _reflns_d_resolution_low  |    |    |   |           | 14.276    |        |         |      |

#--eof--eof--eof--eof--eof--eof--eof--eof--eof--eof--eof--eof--eof--#

**Table S5** Representation of the occupation numbers received after Rietveld refinement of a Ru(1%)/Na-Y zeolite after adsorption-desorption cycles with and without H<sub>2</sub> during regeneration.

| atom         | site        | no H <sub>2</sub><br>ads/des* | with H <sub>2</sub> |             |
|--------------|-------------|-------------------------------|---------------------|-------------|
|              |             |                               | des                 | ads         |
| <b>Ru</b>    | <b>U</b>    | <b>0.0</b>                    | <b>1.1</b>          | <b>0.0</b>  |
| <b>Ru</b>    | <b>SI</b>   | <b>1.6</b>                    | <b>0.0</b>          | <b>1.3</b>  |
| <b>Na</b>    | <b>SII'</b> | <b>0.0</b>                    | <b>0.0</b>          | <b>16.1</b> |
| <b>Na</b>    | <b>SI'</b>  | <b>16.1</b>                   | <b>15.3</b>         | <b>15.2</b> |
| <b>Na</b>    | <b>SIII</b> | <b>8.9</b>                    | <b>3.2</b>          | <b>8.6</b>  |
| <b>Na</b>    | <b>SV</b>   | <b>3.8</b>                    | <b>2.0</b>          | <b>8.6</b>  |
| <b>Na</b>    | <b>SII</b>  | <b>20.6</b>                   | <b>28.0</b>         | <b>2.0</b>  |
| <b>Na</b>    | <b>sum</b>  | <b>49.4</b>                   | <b>48.5</b>         | <b>50.4</b> |
| <b>water</b> |             | <b>84.6</b>                   | <b>85.6</b>         | <b>83.1</b> |

\* patterns of ad- and desorbed samples refined with identical occupation numbers

**Table S6** Average NO<sub>x</sub> adsorption capacity of a Ru(3%)/Na-Y zeolite after 5 min. adsorption with and without SO<sub>2</sub> in lean or rich phases. The NO<sub>x</sub> adsorption capacities were calculated over 10 stable and reversible NO<sub>x</sub> cycles.

| <b>SO<sub>2</sub> in lean phase<br/>(ppm)</b> | <b>SO<sub>2</sub> in rich phase<br/>(ppm)</b> | <b>NO adsorption capacity<br/>(mg NO<sub>x</sub>/g)</b> |
|-----------------------------------------------|-----------------------------------------------|---------------------------------------------------------|
| <b>0</b>                                      | <b>0</b>                                      | <b>2.60 ± 0.03</b>                                      |
| .....                                         |                                               |                                                         |
| <b>0</b>                                      | <b>50</b>                                     | <b>2.70 ± 0.04</b>                                      |
| .....                                         |                                               |                                                         |
| <b>50</b>                                     | <b>0</b>                                      | <b>2.50 ± 0.04</b>                                      |

**Table S7** Rietveld parameters for the refined Ru(3%)/Na-Y structures after Ru ion exchange and after pretreatment.

| Rietveld parameters | Ru(3%)/Na-Y<br>Ion exchanged | Ru(3%)/Na-Y<br>After pretreatment |
|---------------------|------------------------------|-----------------------------------|
| $R_p$               | 0.0488                       | 0.0472                            |
| $R_{wp}$            | 0.0645                       | 0.0720                            |
| $R_e$               | 0.0559                       | 0.0434                            |
| $R_F$               | 0.19703                      | 0.18967                           |
| $\chi^2$            | 1.15                         | 1.67                              |

Rietveld refinement was used to minimize  $\sum w_i (I_{0,i} - I_{c,i})^2$  where  $I_{0,i}$  and  $I_{c,i}$  are the observed and calculated powder diffraction intensities for the  $i^{\text{th}}$  point respectively. Weights,  $w_i$  are  $1/I_{0,i}$ . Weighted and unweighted profile R-factors are defined as  $R_{wp} = \{[\sum w_i (I_{0,i} - I_{c,i})^2] / [\sum w_i (I_{0,i})^2]\}^{1/2}$  and  $R_p = \sum |I_{0,i} - I_{c,i}| / \sum I_{0,i}$ . The structure R-factor is defined as  $R_F = \sum [(F_o - F_c)^2] / [\sum (F_o)^2]$ . The expected R-factor (the statistically best possible value for  $R_{wp}$ ) is defined as  $R_e = [(N-P) / (\sum w_i I_{0,i}^2)]^{1/2}$  where N is the number of observed powder diffraction data points and P is the number of refined parameters.  $\chi^2$  was calculated from  $(R_{wp}/R_e)^2$ .

**Table S8** Atomic coordinates, occupation parameters, isotropic type and displacements ( $\text{\AA}^2$ ) and symmetry multiplicity for Ru(3%)/Na-Y adsorbent after (a) Ru ion exchange and (b) after pretreatment at 450 °C for 1 h under a flow of 5% O<sub>2</sub>, 3% H<sub>2</sub>O and N<sub>2</sub>.

(a)

| Atom |      | x/a         | y/b         | z/c         | Occupancy  | thermal parameter type | u <sub>iso</sub> or u <sub>equiv</sub> | symmetry multiplicity |
|------|------|-------------|-------------|-------------|------------|------------------------|----------------------------------------|-----------------------|
| O    | O1   | 0.89175(17) | 0.10826(17) | 0           | 1          | Uiso                   | 0.0045(24)                             | 96                    |
| O    | O2   | 0.96946(20) | 0.07997(15) | 0.07997(15) | 1          | Uiso                   | 0.0426(17)                             | 96                    |
| O    | O3   | 1.00037(18) | 0.14284(21) | 1.00037(18) | 1          | Uiso                   | 0.0102(27)                             | 96                    |
| O    | O4   | 0.93064(25) | 0.17876(20) | 0.07124(20) | 1          | Uiso                   | 0.0372(32)                             | 96                    |
| Si   | T1   | 0.94664(9)  | 0.12646(9)  | 0.03651(9)  | 1          | Uiso                   | 0.01776                                | 192                   |
| Na   | SI1* | -0.17581    | -0.17581    | -0.17581    | 0.2938(25) | Uiso                   | 0.059(6)                               | 32                    |
| Na   | SI2  | 0.26162     | 0.26162     | 0.26162     | 0.6083(33) | Uiso                   | 0.295(14)                              | 32                    |
| O    | ow2  | 0.3379(5)   | 0.3379(5)   | 0.2393(5)   | 0.6083(33) | Uiso                   | 0.251(13)                              | 96                    |
| Na   | SI3  | 0.375       | 0.375       | 0.5439(7)   | 0.6083(33) | Uiso                   | 0.198(10)                              | 48                    |
| Ru   | Ru15 | 0.5         | 0.5         | 0.5         | 0.1480(18) | Uiso                   | 0.02854                                | 16                    |
| N    | NH3  | 0.5         | 0.5         | 0.4086      | 0.1480(18) | Uiso                   | 0.02792                                | 96                    |

(b)

| Atom |      | x/a          | y/b          | z/c          | Occupancy | thermal parameter type | u <sub>iso</sub> or u <sub>equiv</sub> | symmetry multiplicity |
|------|------|--------------|--------------|--------------|-----------|------------------------|----------------------------------------|-----------------------|
| O    | O1   | 0.89146(32)  | 0.10854(32)  | 0            | 1         | Uiso                   | 0.0702                                 | 96                    |
| O    | O2   | 0.9670(4)    | 0.08008(31)  | 0.08008(31)  | 1         | Uiso                   | 0.01893                                | 96                    |
| O    | O3   | 0.99910(28)  | 0.1468(4)    | 0.99910(28)  | 1         | Uiso                   | 0.05696                                | 96                    |
| O    | O4   | 0.92874(32)  | 0.18016(25)  | 0.06984(25)  | 1         | Uiso                   | 0.00743                                | 96                    |
| Si   | T1   | 0.94445(21)  | 0.12702(18)  | 0.03481(17)  | 1         | Uiso                   | 0.03297                                | 192                   |
| Na   | SI1  | -0.2370(4)   | -0.2370(4)   | -0.2370(4)   | 0.61689   | Uiso                   | 0.025(8)                               | 32                    |
| Na   | SI1* | -0.06774(27) | -0.06774(27) | -0.06774(27) | 0.97804   | Uiso                   | 0.100(5)                               | 32                    |
| O    | ow   | 0.3046(11)   | 0.3046(11)   | 0.3046(11)   | 0.6169    | Uiso                   | 0.71(5)                                | 32                    |
| Ru   | Ru   | 0            | 0            | 0            | 0.09508   | Uiso                   | 0.272(33)                              | 16                    |



Table S9 Framework angles and bondlengths

| <b>NOx adsorbed on Ru1%NaY cycled with H2</b>    |            |          |            |          |            |
|--------------------------------------------------|------------|----------|------------|----------|------------|
| Vector                                           | Length /Å  | Angle    | Degrees /° | Angle    | Degrees /° |
| T1_O1                                            | 1.6470(18) | T1_O1_T1 | 140.37(26) | O1_T1_O2 | 107.58(20) |
| T1_O2                                            | 1.6872(17) | T1_O2_T1 | 142.62(31) | O1_T1_O3 | 110.45(18) |
| T1_O3                                            | 1.6169(18) | T1_O3_T1 | 150.77(27) | O1_T1_O4 | 107.36(21) |
| T1_O4                                            | 1.6044(21) | T1_O4_T1 | 140.23(33) | O2_T1_O3 | 107.28(23) |
| Average:                                         | 1.639      | Average: | 143.5      | O2_T1_O4 | 111.42(25) |
|                                                  |            |          |            | O3_T1_O4 | 112.66(23) |
|                                                  |            |          |            | Average: | 109.5      |
| <b>Ru1%NaY cycled with H2</b>                    |            |          |            |          |            |
| Vector                                           | Length /Å  | Angle    | Degrees /° | Angle    | Degrees /° |
| T1_O1                                            | 1.642(7)   | T1_O1_T1 | 141.12(10) | O1_T1_O2 | 108.6(8)   |
| T1_O2                                            | 1.623(6)   | T1_O2_T1 | 145.52(11) | O1_T1_O3 | 109.1(7)   |
| T1_O3                                            | 1.594(6)   | T1_O3_T1 | 150.50(14) | O1_T1_O4 | 110.4(7)   |
| T1_O4                                            | 1.654(7)   | T1_O4_T1 | 143.64(10) | O2_T1_O3 | 110.0(9)   |
| Average:                                         | 1.628      | Average: | 145.2      | O2_T1_O4 | 109.9(8)   |
|                                                  |            |          |            | O3_T1_O4 | 108.9(10)  |
|                                                  |            |          |            | Average: | 109.5      |
| <b>NOx adsorbed on Ru1%NaY cycled without H2</b> |            |          |            |          |            |
| Vector                                           | Length /Å  | Angle    | Degrees /° | Angle    | Degrees /° |
| T1_O1                                            | 1.6592(28) | T1_O1_T1 | 137.2(4)   | O1_T1_O2 | 112.60(31) |
| T1_O2                                            | 1.6412(23) | T1_O2_T1 | 144.9(5)   | O1_T1_O3 | 114.83(22) |
| T1_O3                                            | 1.6472(28) | T1_O3_T1 | 143.9(4)   | O1_T1_O4 | 106.23(27) |
| T1_O4                                            | 1.6360(25) | T1_O4_T1 | 140.5(4)   | O2_T1_O3 | 106.13(33) |
| Average:                                         | 1.646      | Average: | 141.6      | O2_T1_O4 | 106.86(30) |
|                                                  |            |          |            | O3_T1_O4 | 109.9(4)   |
|                                                  |            |          |            | Average: | 109.4      |
| <b>Ru1%NaY cycled without H2</b>                 |            |          |            |          |            |
| Vector                                           | Length /Å  | Angle    | Degrees /° | Angle    | Degrees /° |
| T1_O1                                            | 1.6545(31) | T1_O1_T1 | 134.9(5)   | O1_T1_O2 | 114.1(4)   |
| T1_O2                                            | 1.6343(25) | T1_O2_T1 | 143.8(5)   | O1_T1_O3 | 115.51(24) |
| T1_O3                                            | 1.6559(33) | T1_O3_T1 | 139.5(4)   | O1_T1_O4 | 106.73(30) |
| T1_O4                                            | 1.6559(26) | T1_O4_T1 | 142.9(4)   | O2_T1_O3 | 107.7(4)   |
| Average:                                         | 1.650      | Average: | 140.3      | O2_T1_O4 | 106.86(33) |
|                                                  |            |          |            | O3_T1_O4 | 105.2(4)   |
|                                                  |            |          |            | Average: | 109.4      |

## References

- 1 R. Sounak and A. Baiker, *Chem. Rev.*, 2009, **109**, 4054-4091.
- 2 H. Mahzoul, J. F. Brillhac and P. Gilot, *Appl. Catal B*, 1999, **20**, 47-55.
- 3 L. Lietti, P. Forzatti, I. Nova and E. Tronconi, *J. Catal.*, 2001, **204**, 175-191.
- 4 T. Lesage, C. Verrier, P. Bazin, J. Saussey and M. Daturi, *Phys. Chem. Chem. Phys.*, 2003, **5**, 4435-4440.
- 5 K. Eguchi, M. Watabe, S. Ogata and H Arai, *J. Catal.*, 1996, **158**, 420-426.
- 6 F. Rodrigues, L. Juste, C. Potvin, J. F. Tempere, G. Blanchard and G. Djega-Mariadassou, *Catal. Lett.*, 2001, **72**, 59-64.
- 7 W. B. Li, R. T. Yang, K. Krist and J. R. Regalbuto, *Energy&Fuels*, 1997, **11**, 428-432.
- 8 I. Nova, L. Castoldi, L. Lietti, E. Tronconi, P. Forzatti, F. Prinetto and G. Ghiotti, *J. Catal.*, 2004, **222**, 377-388.
- 9 T. Lesage, J. Saussey, S. Malo, M. Hervieu, C. Hedouin, G. Blanchard and M. Daturi, *Appl. Catal. B*, 2007, **72**, 166-177.
- 10 K. Yamamoto, R. Kikuchi, T. Takeguchi and K. Eguchi, *J. Catal.*, 2006, **238**, 449-457.
- 11 T. J. Toops, D. B. Smith, W. S. Epling, J. E. Parks and W. P Patridge, *Appl. Catal. B*, 2005, **58**, 255-264.
- 12 W.J. Mortier, "Compilation of extra-framework sites in zeolites", Butterworth, Guildford, 1982.
- 13 L. Zhou, K. Seff, *J. Phys. Chem. B*, 1999, **103**, 9512-9518.
- 14 W. T. Lim, S. M. Seo, G. H. K., H. S. Lee, K. Seff *J. Phys. Chem. C*, 2007, **111**, 18294-18306.
- 15 D.H. Olson, *J. Phys. Chem.*, 1970, **74**, 2758-2764 (1970).
- 16 C. E. A. Kirschhock, B. Hunger, J. Martens, and P. A. Jacobs *J. Phys. Chem. B*, 2000, **104**, 439-448.
- 17 A. Sultana, R. Loenders, O. Monticelli, C. Kirschhock, P.A. Jacobs, J.A. Martens, *Angew. Chem. Int. Ed.* 2000, **39**, 2934-2937.

**Supplementary Material (ESI) for Chemical Science**  
**This journal is (c) The Royal Society of Chemistry 2010**

18 C.E.A. Kirschhock, A. Sultana, E. Godard, J.A. Martens, *Angew. Chem. Int. Ed.* 2004,  
**43**, 3722-3724.
